# Supplementary material for: Theoretical study on reaction mechanism of phosphate-catalysed N–S acyl transfer of N-sulfanylethylanilide (SEAlide)
Source: Royal Society of Chemistry journal article supplement (doi:10.1039/d0ob01968b), 2020-01-01
Supplement: d0ob01968b1.pdf [file d0ob01968b1.pdf]

Supplementary Information for

**Theoretical study on reaction mechanism of phosphate-catalyzed N-S acyl transfer  
of *N*-sulfanylethylanilide (SEAlide)**

Akira Shigenaga<sup>\*a</sup>

<sup>a</sup> Faculty of Pharmacy and Pharmaceutical Sciences, Fukuyama University, Hiroshima 729-0292, Japan.

E-mail:

shigenaga@fukuyama-u.ac.jp

**Table of Contents**

Supplemental figures

|               |     |
|---------------|-----|
| Fig. S1.....  | S2  |
| Fig. S2.....  | S3  |
| Fig. S3.....  | S4  |
| Fig. S4.....  | S5  |
| Fig. S5.....  | S6  |
| Fig. S6.....  | S7  |
| Fig. S7.....  | S8  |
| Fig. S8.....  | S9  |
| Fig. S9.....  | S9  |
| Fig. S10..... | S10 |

Cartesian coordinates and energies

|                                                           |     |
|-----------------------------------------------------------|-----|
| <b>2</b> .....                                            | S11 |
| <b>3</b> .....                                            | S13 |
| <b>without additives</b> .....                            | S14 |
| <b>with H<sub>2</sub>O</b> .....                          | S24 |
| <b>with H<sub>2</sub>PO<sub>4</sub><sup>-</sup></b> ..... | S36 |
| <b>with HSO<sub>4</sub><sup>-</sup></b> .....             | S49 |
| <b>with HCO<sub>3</sub><sup>-</sup></b> .....             | S62 |

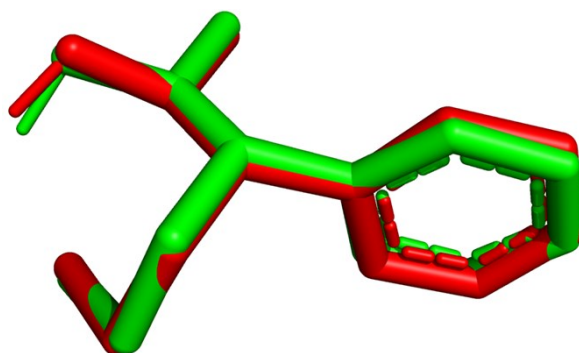

Fig. S1. Overlay of **ts1** optimized in gas phase (green) and water (red). Non-polar hydrogens are omitted for clarity. Images are generated using PyMOL (The PyMOL Molecular Graphics System, Version 4.3. Schrödinger, LCC).

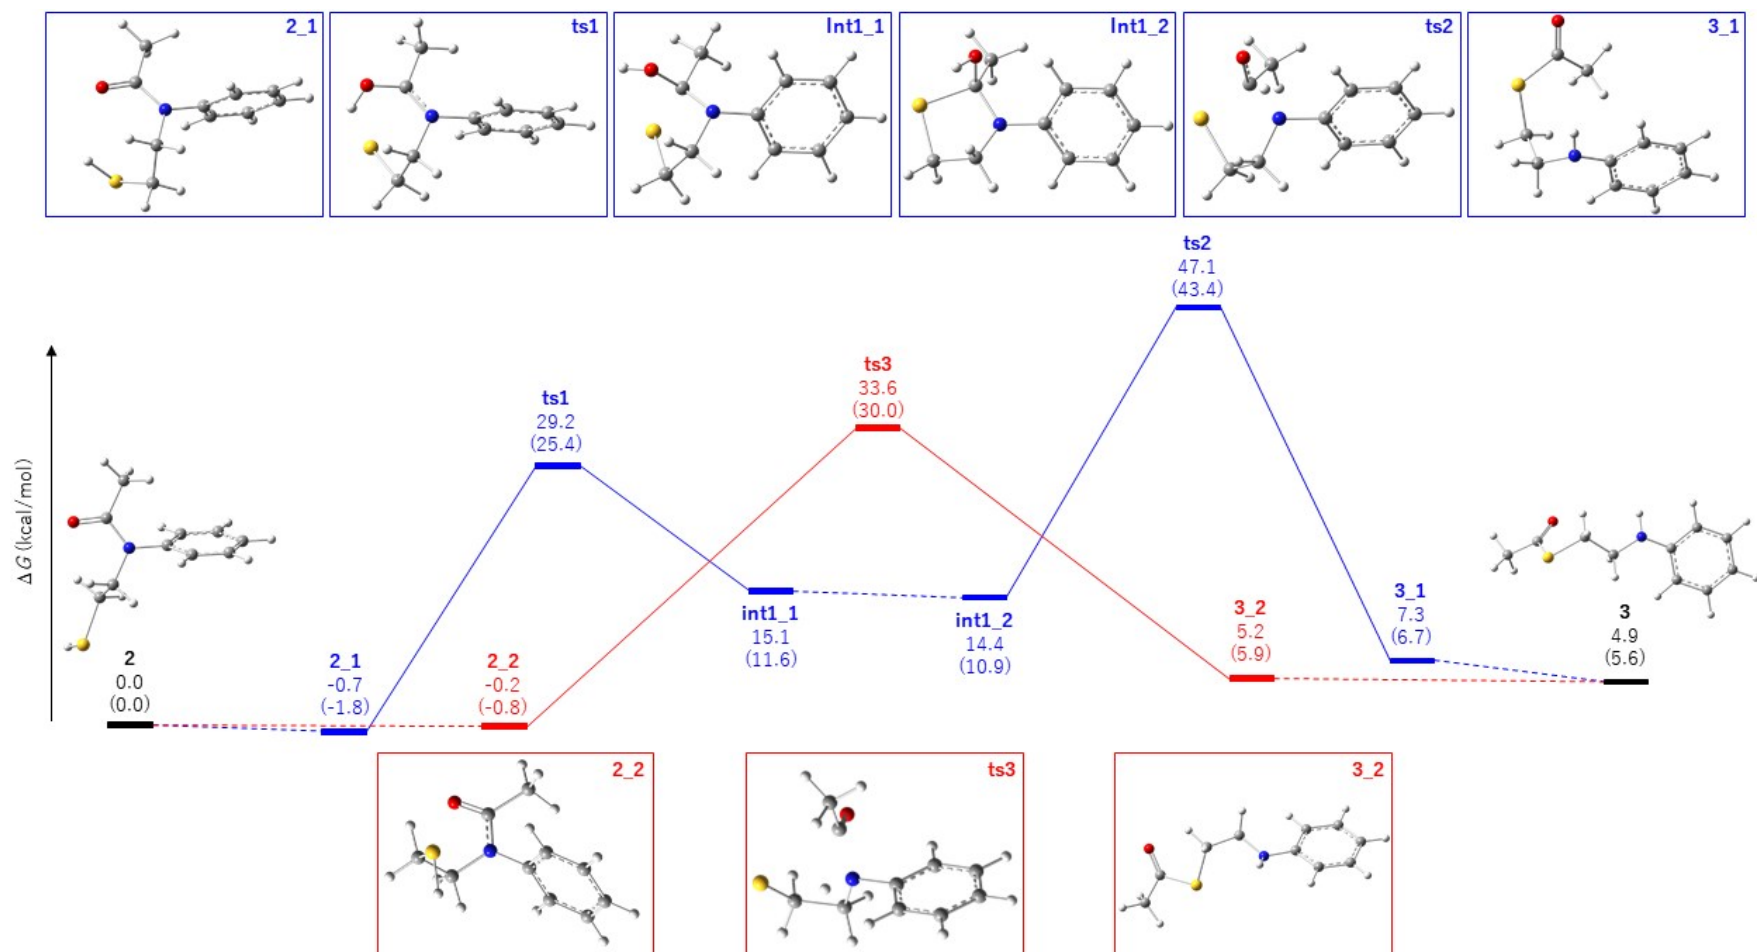

Fig. S2. Calculated Gibbs free energy profile of a reaction depicted in Scheme 2 (blue: stepwise mechanism; red: concerted mechanism) and optimized structures (H: white; C: grey; N: blue; O: red; S: yellow). Compound number  $x_n$  means the  $n$ th conformer of  $x$ .  $\Delta H$  values are shown in parentheses (kcal/mol).

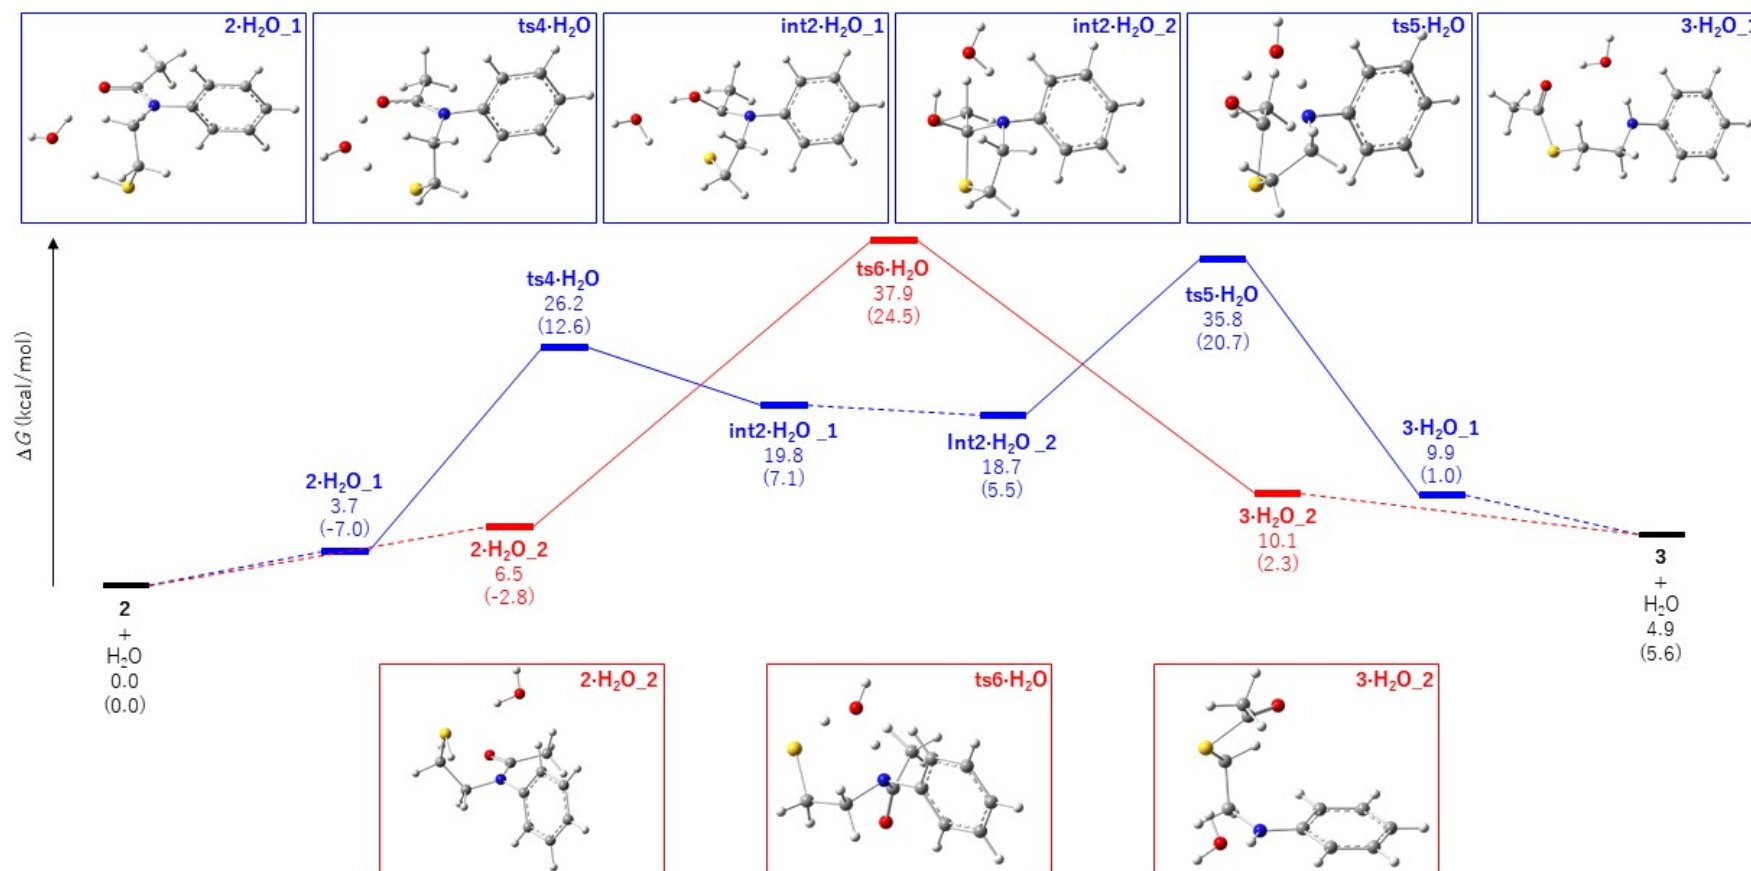

Fig. S3. Calculated Gibbs free energy profile of a reaction in the presence of  $\text{H}_2\text{O}$  depicted in Scheme 3 (blue: stepwise mechanism; red: concerted mechanism) and optimized structures (H: white; C: grey; N: blue; O: red; S: yellow). Compound number  $x_n$  means the  $n$ th conformer of  $x$ .  $\Delta H$  values are shown in parentheses (kcal/mol).

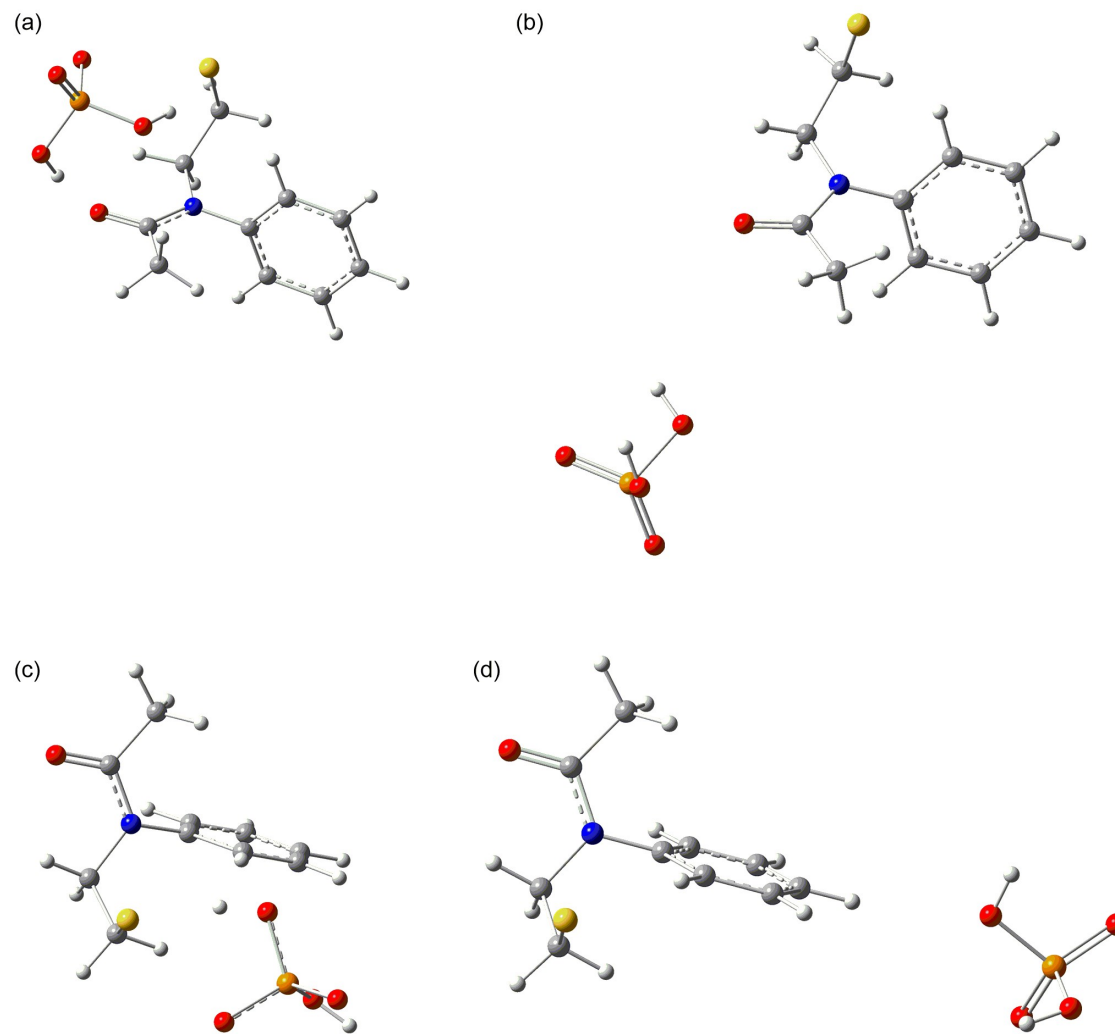

Fig. S4. Structural optimization of  $2 \cdot \text{HPO}_4^{2-}$  at B3LYP/6-31+G(d);  $2 \cdot \text{HPO}_4^{2-}$ \_1 (a) before optimization (an optimized structure of  $2 \cdot \text{H}_2\text{PO}_4^-$ \_1 was diverted) and (b) in the middle of optimization;  $2 \cdot \text{HPO}_4^{2-}$ \_2 (c) before optimization (an optimized structures of  $2 \cdot \text{H}_2\text{PO}_4^-$ \_2 was diverted) and (d) in the middle of optimization.

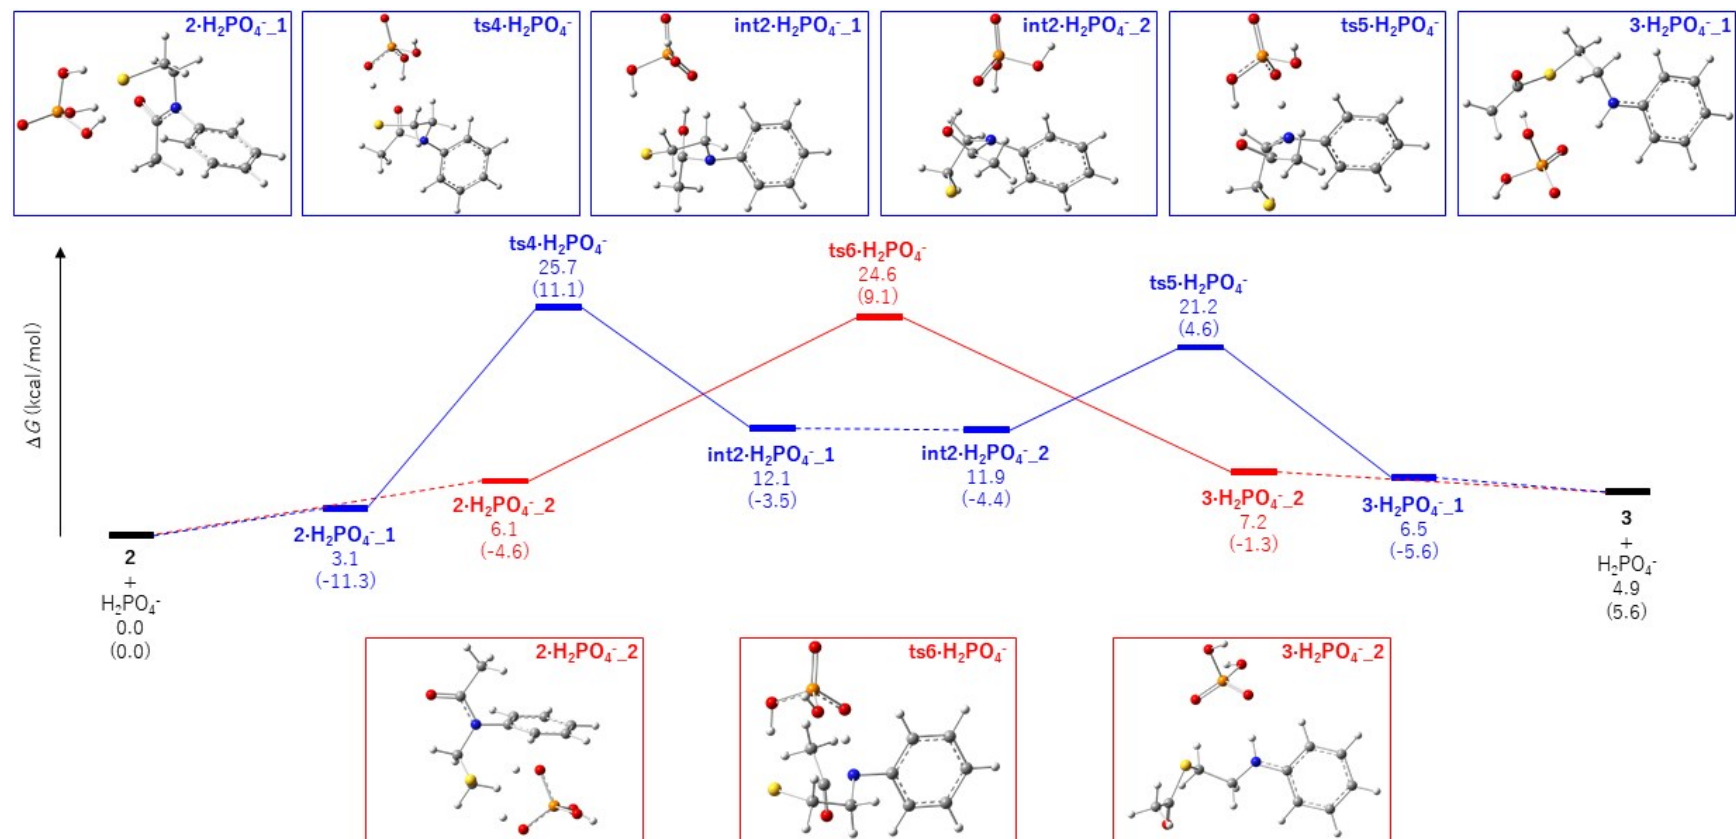

Fig. S5. Calculated Gibbs free energy profile of a reaction in the presence of  $\text{H}_2\text{PO}_4^-$  depicted in Scheme 3 (blue: stepwise mechanism; red: concerted mechanism) and optimized structures (H: white; C: grey; N: blue; O: red; P: orange; S: yellow). Compound number  $x_n$  means the  $n$ th conformer of  $x$ .  $\Delta H$  values are shown in parentheses (kcal/mol).

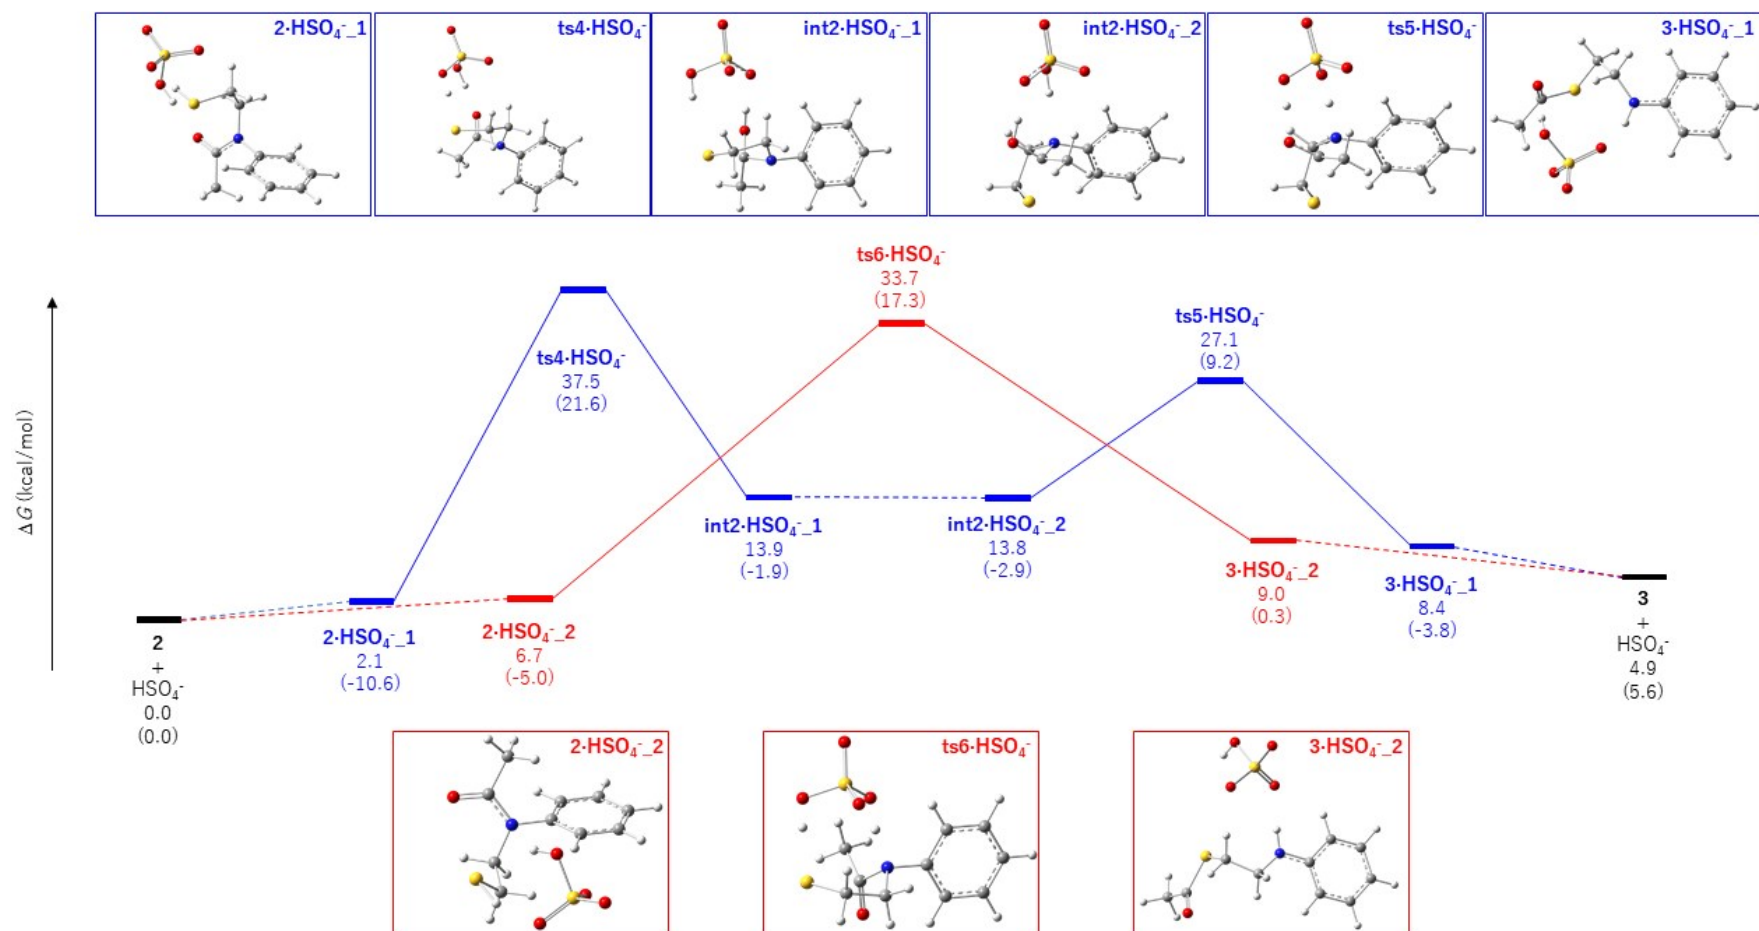

Fig. S6. Calculated Gibbs free energy profile of a reaction in the presence of HSO<sub>4</sub><sup>-</sup> depicted in Scheme 3 (blue: stepwise mechanism; red: concerted mechanism) and optimized structures (H: white; C: grey; N: blue; O: red; S: yellow). Compound number **x**<sub>n</sub> means the **n** th conformer of **x**. ΔH values are shown in parentheses (kcal/mol).

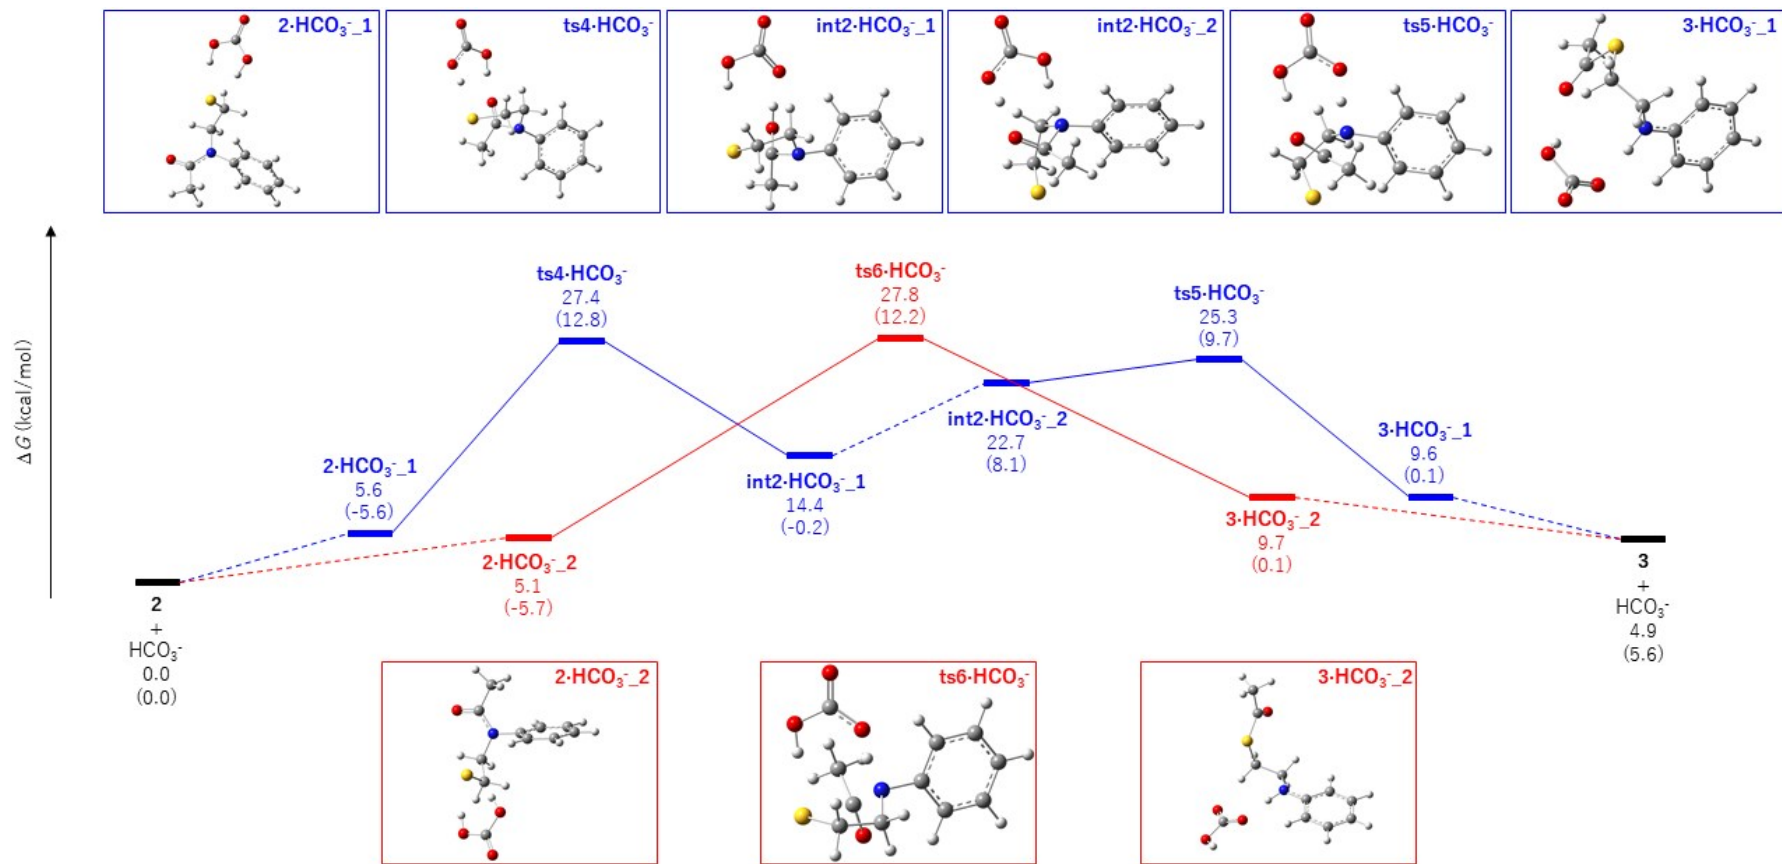

Fig. S7. Calculated Gibbs free energy profile of a reaction in the presence of  $\text{HCO}_3^-$  depicted in Scheme 3 (blue: stepwise mechanism; red: concerted mechanism) and optimized structures (H: white; C: grey; N: blue; O: red; S: yellow). Compound number  $x_n$  means the  $n$ th conformer of  $x$ .  $\Delta H$  values are shown in parentheses (kcal/mol).



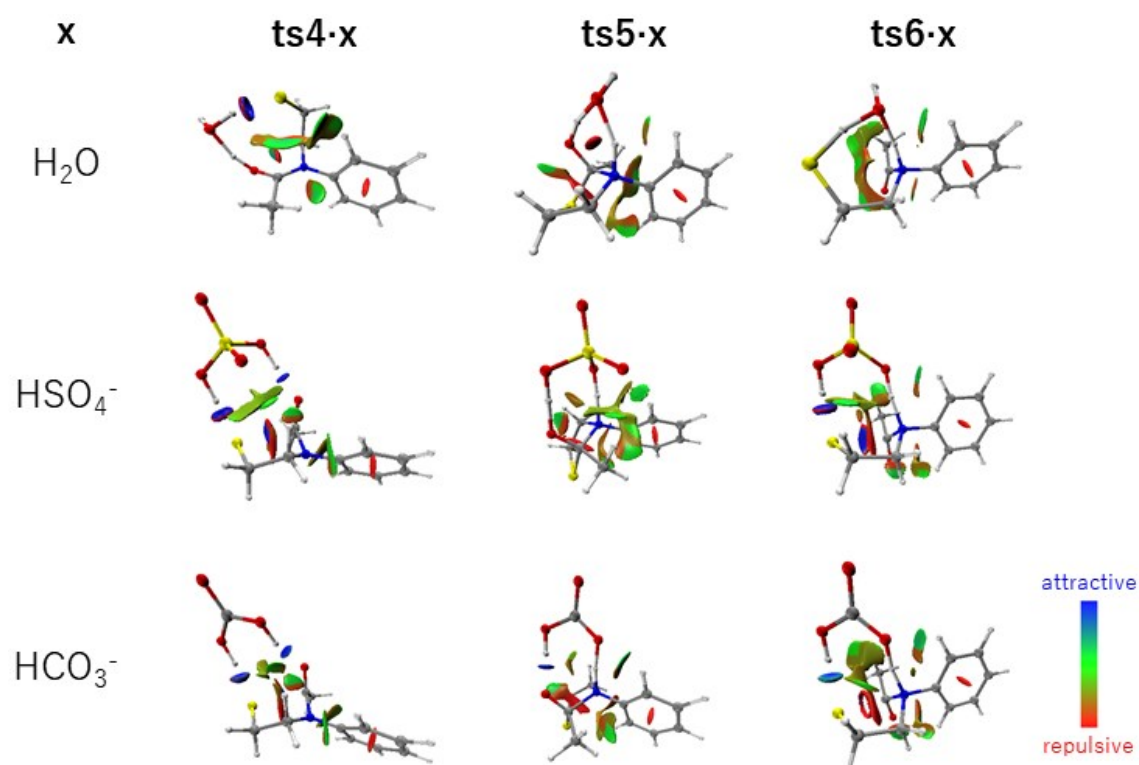

Fig. S8. NCI analyses of **ts4·x**, **ts5·x** and **ts6·x** (H: white; C: grey; N: blue; O: red; S: yellow). Transition states (**x** = H<sub>2</sub>PO<sub>4</sub><sup>-</sup>) are depicted in Fig. S9.

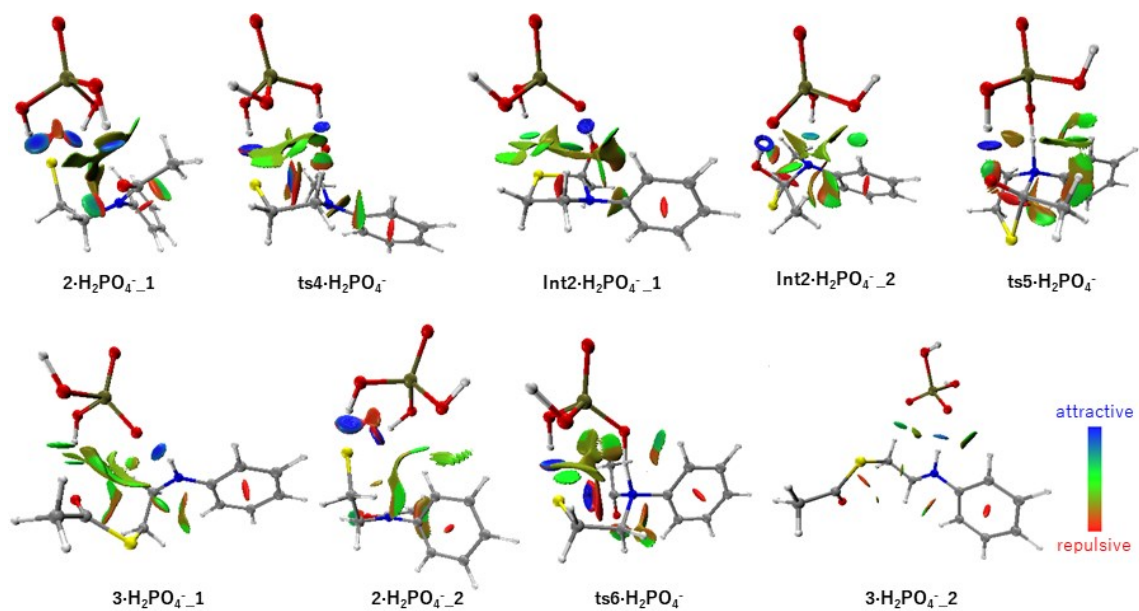

Fig. S9. NCI analyses of intermediates and transition states of the H<sub>2</sub>PO<sub>4</sub><sup>-</sup>-catalysed reaction (H: white; C: grey; N: blue; O: red; P: ochre; S: yellow).

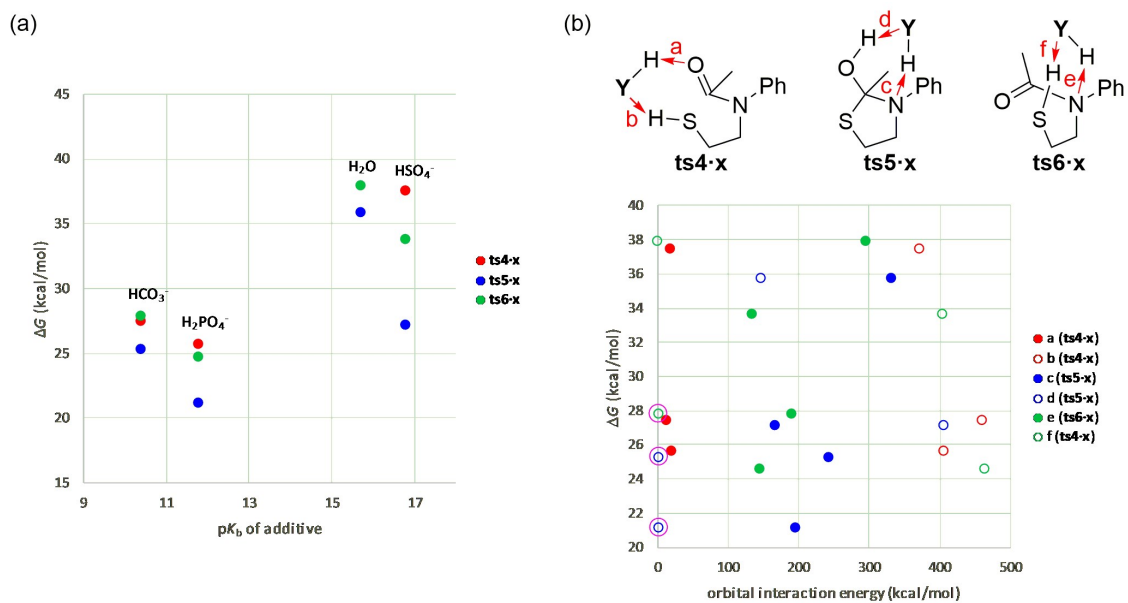

Fig. S10. Relationship between  $\Delta G$  of transition states and (a)  $pK_b$  of additives<sup>20,24,27</sup> or (b) sum of donor-acceptor interaction energies estimated using NBO analysis<sup>29</sup> at M06-2X/6-311+G(d,p) (Purple circles: covalent bond).  $\text{ts4}\cdot\text{H}_2\text{O}$  is not plotted because its conformation is quite different to that of other  $\text{ts4}\cdot\text{x}$  (Fig. 3).

2

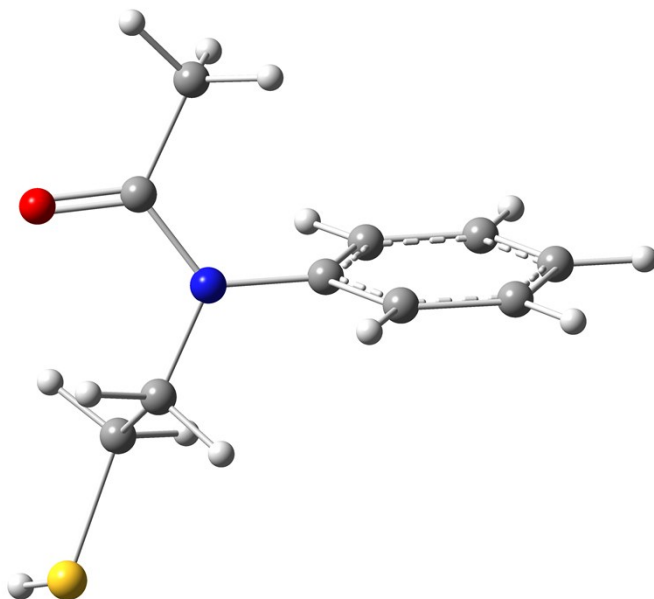

Level of theory: M06-2X/6-311+G(d,p) in PCM (water)//B3LYP/6-31+G(d), 1 atm, 298.15 K

Energy: -916.9897706 hartree/particle

Thermal correction to Gibbs free energy: 0.168964 hartree/particle

Thermal correction to Enthalpy: 0.226025 hartree/particle

Number of imaginary frequencies: 0

| Center Number | Atomic Number | Atomic Type | Coordinates (Angstroms) |           |           |
|---------------|---------------|-------------|-------------------------|-----------|-----------|
|               |               |             | X                       | Y         | Z         |
| 1             | 6             | 0           | 1.570882                | -0.299194 | -1.141665 |
| 2             | 6             | 0           | 2.750960                | -1.033436 | -1.289156 |
| 3             | 6             | 0           | 3.414347                | -1.530263 | -0.164245 |
| 4             | 6             | 0           | 2.895613                | -1.286284 | 1.111434  |
| 5             | 6             | 0           | 1.723227                | -0.543211 | 1.262179  |
| 6             | 6             | 0           | 1.056136                | -0.043136 | 0.135352  |
| 7             | 1             | 0           | 1.044415                | 0.077074  | -2.014703 |
| 8             | 1             | 0           | 3.145109                | -1.224084 | -2.283981 |
| 9             | 1             | 0           | 4.328728                | -2.105951 | -0.280101 |
| 10            | 1             | 0           | 3.407453                | -1.668478 | 1.990785  |
| 11            | 1             | 0           | 1.322133                | -0.340044 | 2.251816  |
| 12            | 6             | 0           | -1.380686               | -0.040808 | 0.668153  |
| 13            | 1             | 0           | -1.078729               | -0.897704 | 1.278531  |
| 14            | 1             | 0           | -2.007122               | 0.620250  | 1.271290  |
| 15            | 6             | 0           | -2.162907               | -0.513566 | -0.562455 |
| 16            | 1             | 0           | -1.521907               | -1.115921 | -1.213178 |
| 17            | 1             | 0           | -2.531663               | 0.355178  | -1.112596 |
| 18            | 16            | 0           | -3.593967               | -1.537682 | 0.006083  |
| 19            | 1             | 0           | -4.211775               | -1.614096 | -1.191429 |
| 20            | 6             | 0           | -0.267978               | 2.057787  | 0.068980  |
| 21            | 6             | 0           | 1.008555                | 2.824210  | -0.236869 |
| 22            | 1             | 0           | 1.864045                | 2.478908  | 0.350615  |
| 23            | 1             | 0           | 1.271711                | 2.723530  | -1.296317 |
| 24            | 1             | 0           | 0.815424                | 3.879022  | -0.032283 |
| 25            | 8             | 0           | -1.357015               | 2.624985  | 0.122864  |
| 26            | 7             | 0           | -0.162446               | 0.697536  | 0.298724  |

2 optimized in PCM (water)

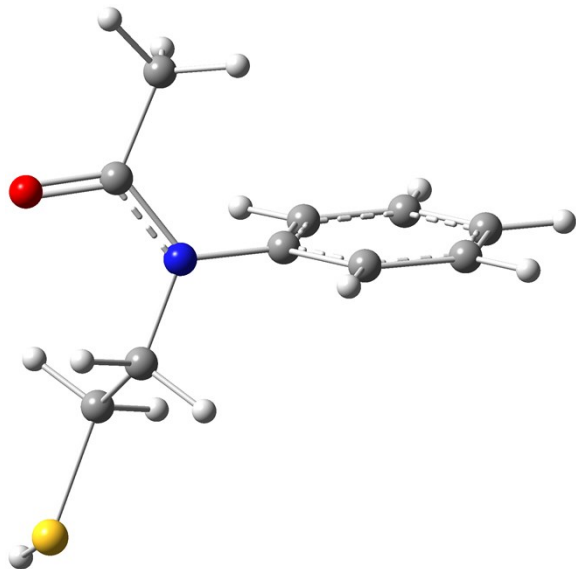

Level of theory: M06-2X/6-311+G(d,p) in PCM (water)//B3LYP/6-31+G(d) in PCM (water), 1 atm, 298.15 K

Energy: -916.98982617 hartree/particle

Thermal correction to Gibbs free energy: 0.168834 hartree/particle

Thermal correction to Enthalpy: 0.22592 hartree/particle

Number of imaginary frequencies: 0

| Center Number | Atomic Number | Atomic Type | Coordinates (Angstroms) |           |           |
|---------------|---------------|-------------|-------------------------|-----------|-----------|
|               |               |             | X                       | Y         | Z         |
| 1             | 6             | 0           | -1.531627               | -0.358633 | 1.141929  |
| 2             | 6             | 0           | -2.703171               | -1.110495 | 1.275369  |
| 3             | 6             | 0           | -3.386214               | -1.555239 | 0.139324  |
| 4             | 6             | 0           | -2.896444               | -1.243813 | -1.134114 |
| 5             | 6             | 0           | -1.731110               | -0.485659 | -1.271845 |
| 6             | 6             | 0           | -1.049169               | -0.038568 | -0.132580 |
| 7             | 1             | 0           | -0.993304               | -0.019445 | 2.022543  |
| 8             | 1             | 0           | -3.075793               | -1.352852 | 2.266940  |
| 9             | 1             | 0           | -4.294203               | -2.142757 | 0.244769  |
| 10            | 1             | 0           | -3.423791               | -1.585440 | -2.020666 |
| 11            | 1             | 0           | -1.350690               | -0.232895 | -2.257928 |
| 12            | 6             | 0           | 1.383342                | -0.010692 | -0.670799 |
| 13            | 1             | 0           | 1.090721                | -0.810709 | -1.356773 |
| 14            | 1             | 0           | 2.034793                | 0.684504  | -1.204496 |
| 15            | 6             | 0           | 2.108877                | -0.591772 | 0.547677  |
| 16            | 1             | 0           | 1.463432                | -1.295508 | 1.079177  |
| 17            | 1             | 0           | 2.402963                | 0.211150  | 1.227525  |
| 18            | 16            | 0           | 3.622734                | -1.485419 | -0.030196 |
| 19            | 1             | 0           | 4.021792                | -1.918470 | 1.183268  |
| 20            | 6             | 0           | 0.245470                | 2.067838  | -0.040931 |
| 21            | 6             | 0           | -1.036847               | 2.803870  | 0.299115  |
| 22            | 1             | 0           | -1.889092               | 2.461319  | -0.293624 |
| 23            | 1             | 0           | -1.288052               | 2.660818  | 1.356271  |
| 24            | 1             | 0           | -0.871610               | 3.869171  | 0.126690  |
| 25            | 8             | 0           | 1.328521                | 2.667487  | -0.103053 |
| 26            | 7             | 0           | 0.166039                | 0.719557  | -0.283572 |

3

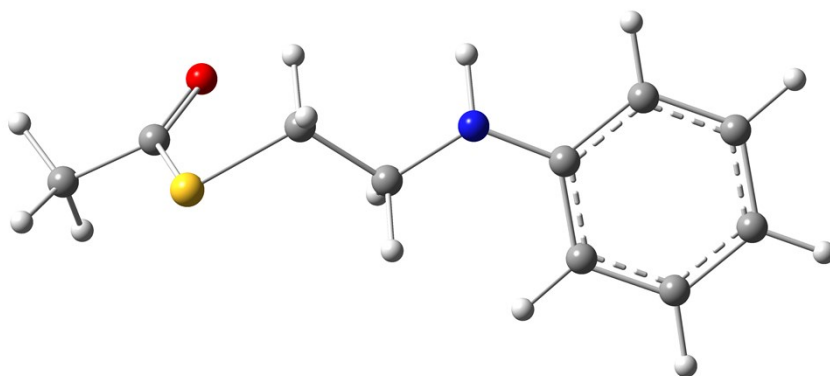

Level of theory: M06-2X/6-311+G(d,p) in PCM (water)//B3LYP/6-31+G(d), 1 atm, 298.15 K

Energy: -916.98261587 hartree/particle

Thermal correction to Gibbs free energy: 0.169555 hartree/particle

Thermal correction to Enthalpy: 0.22772 hartree/particle

Number of imaginary frequencies: 0

| Center<br>Number | Atomic<br>Number | Atomic<br>Type | Coordinates (Angstroms) |           |           |
|------------------|------------------|----------------|-------------------------|-----------|-----------|
|                  |                  |                | X                       | Y         | Z         |
| 1                | 6                | 0              | 4.808661                | 0.640708  | 0.404508  |
| 2                | 6                | 0              | 4.513493                | -0.725710 | 0.490862  |
| 3                | 6                | 0              | 3.228059                | -1.192387 | 0.232978  |
| 4                | 6                | 0              | 2.192219                | -0.301402 | -0.117831 |
| 5                | 6                | 0              | 2.489994                | 1.071703  | -0.193162 |
| 6                | 6                | 0              | 3.787469                | 1.527382  | 0.061178  |
| 7                | 1                | 0              | 5.812961                | 1.003181  | 0.604704  |
| 8                | 1                | 0              | 5.292111                | -1.435713 | 0.759676  |
| 9                | 1                | 0              | 3.015436                | -2.258497 | 0.291131  |
| 10               | 1                | 0              | 1.717178                | 1.789988  | -0.445820 |
| 11               | 1                | 0              | 3.992174                | 2.593463  | -0.004692 |
| 12               | 7                | 0              | 0.925007                | -0.817576 | -0.414475 |
| 13               | 1                | 0              | 0.746362                | -1.708877 | 0.035189  |
| 14               | 6                | 0              | -0.251240               | 0.037547  | -0.486069 |
| 15               | 1                | 0              | -0.463625               | 0.540965  | 0.471244  |
| 16               | 1                | 0              | -0.076423               | 0.816258  | -1.236165 |
| 17               | 6                | 0              | -1.460840               | -0.799551 | -0.910291 |
| 18               | 1                | 0              | -1.659362               | -1.598148 | -0.187772 |
| 19               | 1                | 0              | -1.295076               | -1.245627 | -1.895267 |
| 20               | 16               | 0              | -2.996170               | 0.188787  | -1.034360 |
| 21               | 6                | 0              | -3.629853               | 0.017860  | 0.646111  |
| 22               | 6                | 0              | -4.906237               | 0.793935  | 0.896139  |
| 23               | 1                | 0              | -5.382770               | 1.130188  | -0.028736 |
| 24               | 1                | 0              | -5.597267               | 0.165163  | 1.466101  |
| 25               | 1                | 0              | -4.664836               | 1.671351  | 1.508220  |
| 26               | 8                | 0              | -3.075443               | -0.647720 | 1.495841  |

**without additives**

2\_1

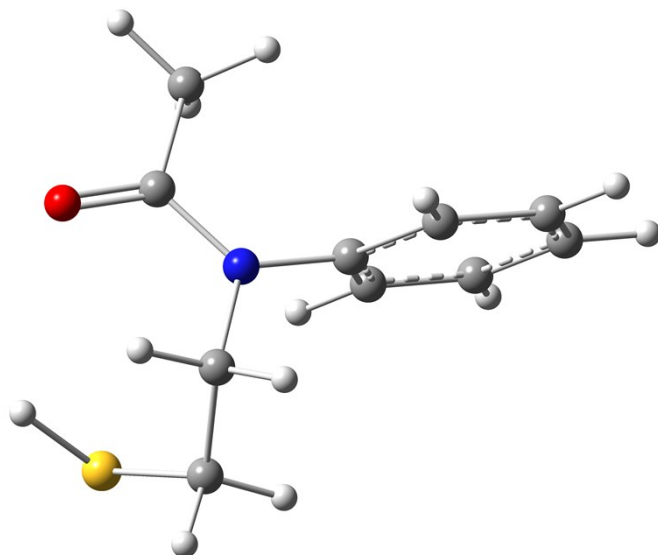

Level of theory: M06-2X/6-311+G(d,p) in PCM (water)//B3LYP/6-31+G(d), 1 atm, 298.15 K

Energy: -916.99262379 hartree/particle

Thermal correction to Gibbs free energy: 0.170630 hartree/particle

Thermal correction to Enthalpy: 0.225952 hartree/particle

Number of imaginary frequencies: 0

| Center Number | Atomic Number | Atomic Type | Coordinates (Angstroms) |           |           |
|---------------|---------------|-------------|-------------------------|-----------|-----------|
|               |               |             | X                       | Y         | Z         |
| 1             | 6             | 0           | 1.185469                | -0.625239 | -0.968116 |
| 2             | 6             | 0           | 2.500125                | -0.990395 | -1.272005 |
| 3             | 6             | 0           | 3.552925                | -0.579688 | -0.449585 |
| 4             | 6             | 0           | 3.288533                | 0.200873  | 0.680338  |
| 5             | 6             | 0           | 1.977011                | 0.573941  | 0.982908  |
| 6             | 6             | 0           | 0.921383                | 0.166530  | 0.156444  |
| 7             | 1             | 0           | 0.358471                | -0.949400 | -1.593661 |
| 8             | 1             | 0           | 2.699074                | -1.601353 | -2.148768 |
| 9             | 1             | 0           | 4.573982                | -0.866948 | -0.686528 |
| 10            | 1             | 0           | 4.103276                | 0.524972  | 1.322699  |
| 11            | 1             | 0           | 1.764587                | 1.190423  | 1.852830  |
| 12            | 7             | 0           | -0.426678               | 0.537602  | 0.487527  |
| 13            | 6             | 0           | -1.113482               | -0.243428 | 1.519998  |
| 14            | 1             | 0           | -0.458131               | -0.313835 | 2.398598  |
| 15            | 1             | 0           | -2.002682               | 0.324038  | 1.801594  |
| 16            | 6             | 0           | -1.503685               | -1.668541 | 1.105343  |
| 17            | 1             | 0           | -2.033853               | -2.135991 | 1.942229  |
| 18            | 1             | 0           | -0.614453               | -2.274268 | 0.901321  |
| 19            | 16            | 0           | -2.523611               | -1.794170 | -0.424525 |
| 20            | 6             | 0           | -1.121480               | 1.536299  | -0.170366 |
| 21            | 6             | 0           | -0.368948               | 2.330200  | -1.224267 |
| 22            | 1             | 0           | -0.941103               | 3.237033  | -1.428020 |
| 23            | 1             | 0           | 0.647310                | 2.590692  | -0.914356 |
| 24            | 1             | 0           | -0.292939               | 1.751031  | -2.151877 |
| 25            | 8             | 0           | -2.300062               | 1.777570  | 0.087635  |
| 26            | 1             | 0           | -3.321513               | -0.734509 | -0.171866 |

ts1

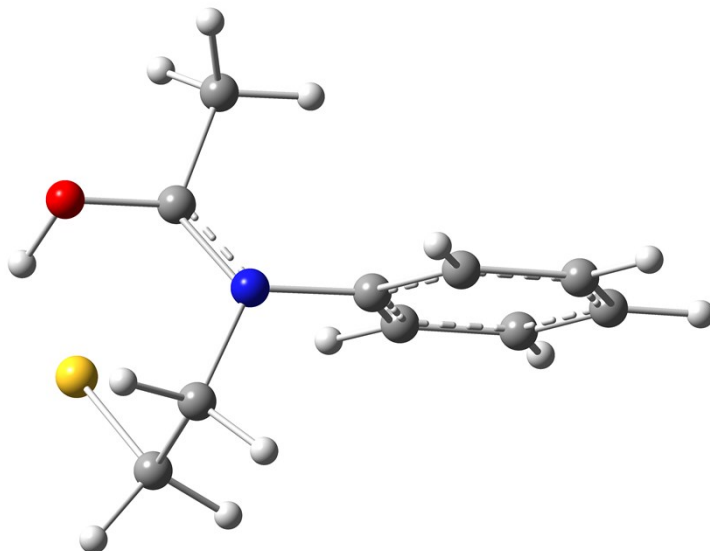

Level of theory: M06-2X/6-311+G(d,p) in PCM (water)//B3LYP/6-31+G(d), 1 atm, 298.15 K

Energy: -916.94898367 hartree/particle

Thermal correction to Gibbs free energy: 0.174706 hartree/particle

Thermal correction to Enthalpy: 0.225794 hartree/particle

Number of imaginary frequencies: 1

IRC calc: OK

| Center Number | Atomic Number | Atomic Type | Coordinates (Angstroms) |           |           |
|---------------|---------------|-------------|-------------------------|-----------|-----------|
|               |               |             | X                       | Y         | Z         |
| 1             | 6             | 0           | 1.234104                | -0.750806 | -0.751185 |
| 2             | 6             | 0           | 2.551106                | -1.091209 | -1.070367 |
| 3             | 6             | 0           | 3.619092                | -0.513490 | -0.376724 |
| 4             | 6             | 0           | 3.372292                | 0.412311  | 0.641332  |
| 5             | 6             | 0           | 2.058874                | 0.762088  | 0.966440  |
| 6             | 6             | 0           | 0.999837                | 0.180603  | 0.265469  |
| 7             | 1             | 0           | 0.390106                | -1.183574 | -1.282867 |
| 8             | 1             | 0           | 2.740365                | -1.811884 | -1.861468 |
| 9             | 1             | 0           | 4.641053                | -0.784018 | -0.628717 |
| 10            | 1             | 0           | 4.199349                | 0.864495  | 1.181952  |
| 11            | 1             | 0           | 1.851020                | 1.482106  | 1.753286  |
| 12            | 7             | 0           | -0.355524               | 0.524294  | 0.646635  |
| 13            | 6             | 0           | -1.010556               | -0.391082 | 1.600061  |
| 14            | 1             | 0           | -0.260645               | -0.694000 | 2.335940  |
| 15            | 1             | 0           | -1.799708               | 0.167521  | 2.107491  |
| 16            | 6             | 0           | -1.602945               | -1.618962 | 0.847556  |
| 17            | 1             | 0           | -2.304067               | -2.096050 | 1.541305  |
| 18            | 1             | 0           | -0.806824               | -2.344546 | 0.642519  |
| 19            | 16            | 0           | -2.456317               | -1.164384 | -0.704941 |
| 20            | 6             | 0           | -1.151717               | 1.212392  | -0.178307 |
| 21            | 6             | 0           | -0.623126               | 2.022784  | -1.318716 |
| 22            | 1             | 0           | -0.646884               | 3.079192  | -1.017246 |
| 23            | 1             | 0           | 0.388889                | 1.753659  | -1.617332 |
| 24            | 1             | 0           | -1.303301               | 1.911715  | -2.166851 |
| 25            | 8             | 0           | -2.381313               | 1.567827  | 0.235922  |
| 26            | 1             | 0           | -2.930890               | 0.725079  | 0.123870  |

ts1 optimized in PCM (water)

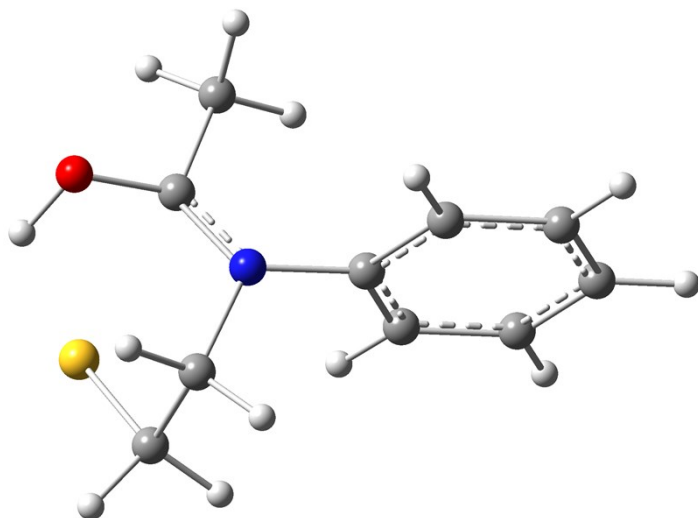

Level of theory: M06-2X/6-311+G(d,p) in PCM (water)//B3LYP/6-31+G(d) in PCM (water), 1 atm, 298.15 K

Energy: -916.94853209 hartree/particle

Thermal correction to Gibbs free energy: 0.174256 hartree/particle

Thermal correction to Enthalpy: 0.226279 hartree/particle

Number of imaginary frequencies: 1

IRC calc: OK

| Center Number | Atomic Number | Atomic Type | Coordinates (Angstroms) |           |           |
|---------------|---------------|-------------|-------------------------|-----------|-----------|
|               |               |             | X                       | Y         | Z         |
| 1             | 6             | 0           | 1.300839                | -0.943035 | -0.587924 |
| 2             | 6             | 0           | 2.634577                | -1.241327 | -0.880785 |
| 3             | 6             | 0           | 3.667271                | -0.480930 | -0.322259 |
| 4             | 6             | 0           | 3.367061                | 0.586201  | 0.530295  |
| 5             | 6             | 0           | 2.036031                | 0.892774  | 0.827932  |
| 6             | 6             | 0           | 1.011447                | 0.126225  | 0.266423  |
| 7             | 1             | 0           | 0.494597                | -1.516221 | -1.034254 |
| 8             | 1             | 0           | 2.864123                | -2.067838 | -1.547531 |
| 9             | 1             | 0           | 4.702268                | -0.718428 | -0.552282 |
| 10            | 1             | 0           | 4.165392                | 1.180637  | 0.965555  |
| 11            | 1             | 0           | 1.788508                | 1.716755  | 1.490731  |
| 12            | 7             | 0           | -0.355079               | 0.448822  | 0.626579  |
| 13            | 6             | 0           | -1.031704               | -0.439944 | 1.582688  |
| 14            | 1             | 0           | -0.288361               | -0.810047 | 2.291510  |
| 15            | 1             | 0           | -1.774479               | 0.145177  | 2.128043  |
| 16            | 6             | 0           | -1.716067               | -1.611026 | 0.813538  |
| 17            | 1             | 0           | -2.454506               | -2.046759 | 1.493638  |
| 18            | 1             | 0           | -0.976576               | -2.386401 | 0.590348  |
| 19            | 16            | 0           | -2.527901               | -1.048686 | -0.731439 |
| 20            | 6             | 0           | -1.140012               | 1.149960  | -0.196927 |
| 21            | 6             | 0           | -0.606520               | 1.863836  | -1.397054 |
| 22            | 1             | 0           | -0.275838               | 2.865609  | -1.088421 |
| 23            | 1             | 0           | 0.230381                | 1.346295  | -1.864131 |
| 24            | 1             | 0           | -1.416110               | 1.990249  | -2.118442 |
| 25            | 8             | 0           | -2.285851               | 1.691157  | 0.309823  |
| 26            | 1             | 0           | -2.978174               | 0.992531  | 0.268055  |



int1\_1

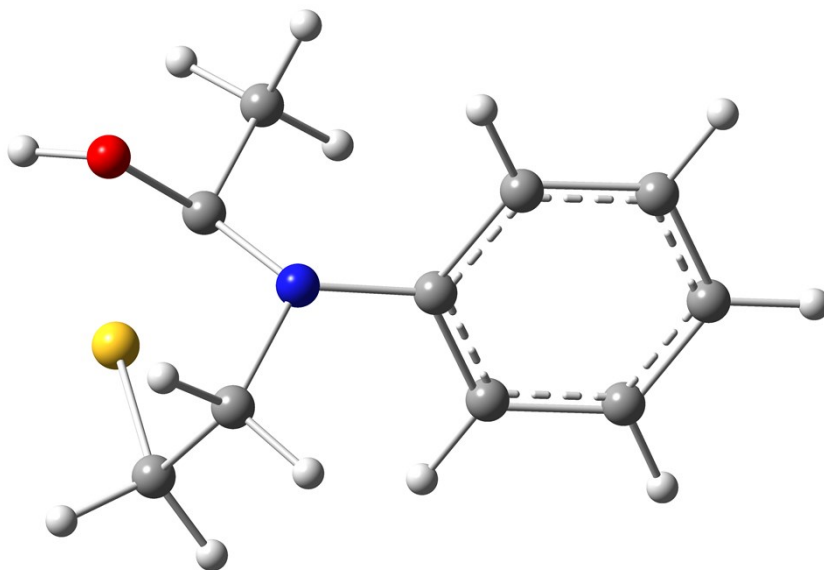

Level of theory: M06-2X/6-311+G(d,p) in PCM (water)//B3LYP/6-31+G(d), 1 atm, 298.15 K

Energy: -916.97336682 hartree/particle

Thermal correction to Gibbs free energy: 0.176680 hartree/particle

Thermal correction to Enthalpy: 0.228077 hartree/particle

Number of imaginary frequencies: 0

| Center<br>Number | Atomic<br>Number | Atomic<br>Type | Coordinates (Angstroms) |           |           |
|------------------|------------------|----------------|-------------------------|-----------|-----------|
|                  |                  |                | X                       | Y         | Z         |
| 1                | 6                | 0              | 1.423224                | -1.134823 | -0.259478 |
| 2                | 6                | 0              | 2.757541                | -1.317906 | -0.633362 |
| 3                | 6                | 0              | 3.698315                | -0.308813 | -0.412286 |
| 4                | 6                | 0              | 3.297942                | 0.883610  | 0.198607  |
| 5                | 6                | 0              | 1.969991                | 1.060625  | 0.591085  |
| 6                | 6                | 0              | 1.016353                | 0.058542  | 0.357644  |
| 7                | 1                | 0              | 0.697999                | -1.916917 | -0.460799 |
| 8                | 1                | 0              | 3.057514                | -2.248280 | -1.109306 |
| 9                | 1                | 0              | 4.734264                | -0.452134 | -0.708151 |
| 10               | 1                | 0              | 4.023863                | 1.670564  | 0.387574  |
| 11               | 1                | 0              | 1.657346                | 1.968574  | 1.098555  |
| 12               | 7                | 0              | -0.327992               | 0.284457  | 0.798383  |
| 13               | 6                | 0              | -1.026792               | -0.803533 | 1.486576  |
| 14               | 1                | 0              | -0.295288               | -1.455078 | 1.970731  |
| 15               | 1                | 0              | -1.659125               | -0.360766 | 2.261079  |
| 16               | 6                | 0              | -1.928348               | -1.584787 | 0.485593  |
| 17               | 1                | 0              | -2.855444               | -1.906087 | 0.967777  |
| 18               | 1                | 0              | -1.427734               | -2.469617 | 0.080757  |
| 19               | 16               | 0              | -2.290416               | -0.426084 | -0.895353 |
| 20               | 6                | 0              | -1.259689               | 0.963893  | -0.057564 |
| 21               | 6                | 0              | -0.662684               | 1.864451  | -1.130938 |
| 22               | 1                | 0              | -0.139557               | 2.702010  | -0.659400 |
| 23               | 1                | 0              | 0.026390                | 1.323684  | -1.783119 |
| 24               | 1                | 0              | -1.473152               | 2.274179  | -1.742361 |
| 25               | 8                | 0              | -2.122821               | 1.706942  | 0.799938  |
| 26               | 1                | 0              | -2.994326               | 1.764444  | 0.376217  |

int1\_2

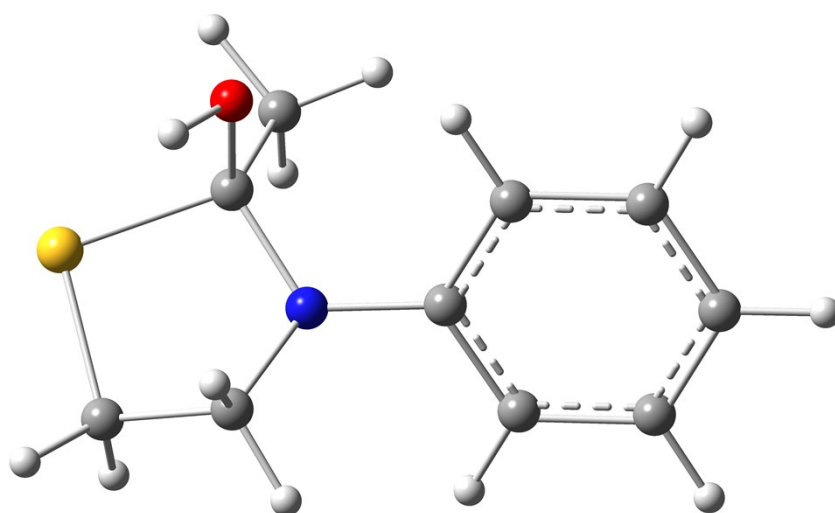

Level of theory: M06-2X/6-311+G(d,p) in PCM (water)//B3LYP/6-31+G(d), 1 atm, 298.15 K

Energy: -916.97421990 hartree/particle

Thermal correction to Gibbs free energy: 0.176349 hartree/particle

Thermal correction to Enthalpy: 0.227868 hartree/particle

Number of imaginary frequencies: 0

| Center Number | Atomic Number | Atomic Type | Coordinates (Angstroms) |           |           |
|---------------|---------------|-------------|-------------------------|-----------|-----------|
|               |               |             | X                       | Y         | Z         |
| 1             | 6             | 0           | -1.828233               | 0.852872  | -0.391028 |
| 2             | 6             | 0           | -3.225598               | 0.879098  | -0.333752 |
| 3             | 6             | 0           | -3.945901               | -0.236630 | 0.096237  |
| 4             | 6             | 0           | -3.251498               | -1.386240 | 0.488117  |
| 5             | 6             | 0           | -1.857828               | -1.410384 | 0.459504  |
| 6             | 6             | 0           | -1.125459               | -0.294983 | 0.012972  |
| 7             | 1             | 0           | -1.280500               | 1.715003  | -0.752710 |
| 8             | 1             | 0           | -3.750852               | 1.779160  | -0.644601 |
| 9             | 1             | 0           | -5.031923               | -0.212338 | 0.129010  |
| 10            | 1             | 0           | -3.795158               | -2.260678 | 0.837587  |
| 11            | 1             | 0           | -1.323102               | -2.292146 | 0.803502  |
| 12            | 7             | 0           | 0.299012                | -0.389885 | -0.000947 |
| 13            | 6             | 0           | 0.918782                | -1.366094 | -0.898379 |
| 14            | 1             | 0           | 0.333361                | -2.288982 | -0.899047 |
| 15            | 1             | 0           | 0.963251                | -1.002197 | -1.941640 |
| 16            | 6             | 0           | 2.324830                | -1.592859 | -0.350857 |
| 17            | 1             | 0           | 3.008983                | -1.986803 | -1.107191 |
| 18            | 1             | 0           | 2.308399                | -2.264702 | 0.512400  |
| 19            | 16            | 0           | 2.884411                | 0.078189  | 0.170625  |
| 20            | 6             | 0           | 1.138822                | 0.774289  | 0.226374  |
| 21            | 6             | 0           | 0.851694                | 1.451175  | 1.563396  |
| 22            | 1             | 0           | -0.146019               | 1.900190  | 1.554730  |
| 23            | 1             | 0           | 0.908776                | 0.720460  | 2.373049  |
| 24            | 1             | 0           | 1.581484                | 2.246074  | 1.738870  |
| 25            | 8             | 0           | 1.036868                | 1.805131  | -0.764407 |
| 26            | 1             | 0           | 1.519444                | 1.523296  | -1.558565 |

ts2

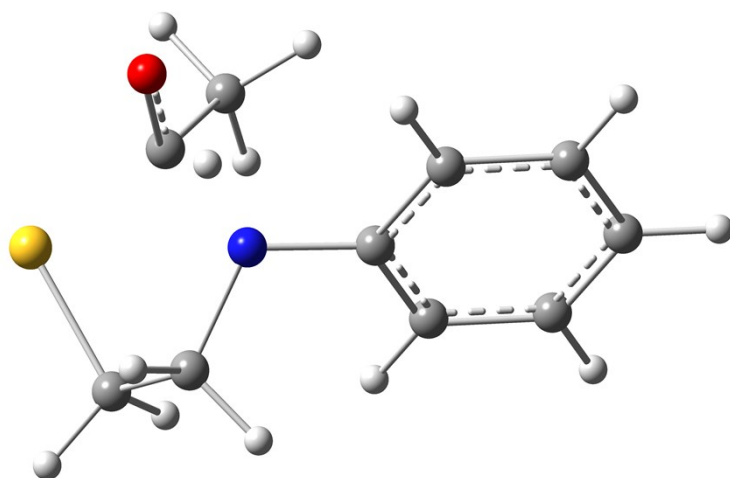

Level of theory: M06-2X/6-311+G(d,p) in PCM (water)//B3LYP/6-31+G(d), 1 atm, 298.15 K

Energy: -916.91735427 hartree/particle

Thermal correction to Gibbs free energy: 0.171634 hartree/particle

Thermal correction to Enthalpy: 0.222721 hartree/particle

Number of imaginary frequencies: 1

IRC calc: OK

| Center Number | Atomic Number | Atomic Type | Coordinates (Angstroms) |           |           |
|---------------|---------------|-------------|-------------------------|-----------|-----------|
|               |               |             | X                       | Y         | Z         |
| 1             | 6             | 0           | -1.924147               | 0.887941  | -0.829980 |
| 2             | 6             | 0           | -3.273078               | 0.826076  | -0.471195 |
| 3             | 6             | 0           | -3.738154               | -0.208270 | 0.344262  |
| 4             | 6             | 0           | -2.845567               | -1.181521 | 0.803987  |
| 5             | 6             | 0           | -1.495423               | -1.120684 | 0.454079  |
| 6             | 6             | 0           | -1.031126               | -0.084855 | -0.367390 |
| 7             | 1             | 0           | -1.559319               | 1.689298  | -1.465856 |
| 8             | 1             | 0           | -3.959177               | 1.585804  | -0.835751 |
| 9             | 1             | 0           | -4.788209               | -0.257841 | 0.619243  |
| 10            | 1             | 0           | -3.198165               | -1.988485 | 1.440947  |
| 11            | 1             | 0           | -0.808168               | -1.875391 | 0.825259  |
| 12            | 7             | 0           | 0.362578                | 0.029535  | -0.739217 |
| 13            | 6             | 0           | 1.031180                | -1.211767 | -1.227106 |
| 14            | 1             | 0           | 0.276160                | -1.969857 | -1.455988 |
| 15            | 1             | 0           | 1.562107                | -0.959064 | -2.149768 |
| 16            | 6             | 0           | 2.035281                | -1.676792 | -0.172814 |
| 17            | 1             | 0           | 2.755069                | -2.380621 | -0.602018 |
| 18            | 1             | 0           | 1.540910                | -2.168434 | 0.673188  |
| 19            | 16            | 0           | 2.912934                | -0.163203 | 0.354265  |
| 20            | 6             | 0           | 1.329201                | 0.922261  | 0.242705  |
| 21            | 6             | 0           | 0.775203                | 1.187241  | 1.632672  |
| 22            | 1             | 0           | -0.176732               | 1.723269  | 1.563013  |
| 23            | 1             | 0           | 0.646634                | 0.272501  | 2.218836  |
| 24            | 1             | 0           | 1.492649                | 1.831250  | 2.151278  |
| 25            | 8             | 0           | 1.399321                | 1.969193  | -0.579669 |
| 26            | 1             | 0           | 0.696453                | 1.110737  | -1.294064 |

3\_1

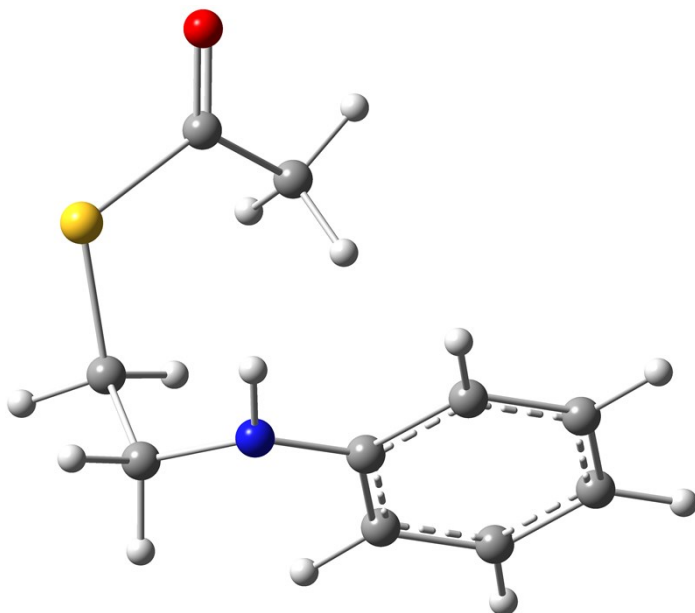

Level of theory: M06-2X/6-311+G(d,p) in PCM (water)//B3LYP/6-31+G(d), 1 atm, 298.15 K

Energy: -916.98076526 hartree/particle

Thermal correction to Gibbs free energy: 0.171552 hartree/particle

Thermal correction to Enthalpy: 0.227684 hartree/particle

Number of imaginary frequencies: 0

| Center Number | Atomic Number | Atomic Type | Coordinates (Angstroms) |           |           |
|---------------|---------------|-------------|-------------------------|-----------|-----------|
|               |               |             | X                       | Y         | Z         |
| 1             | 6             | 0           | -2.083859               | 0.660310  | -1.029702 |
| 2             | 6             | 0           | -3.260868               | 0.832690  | -0.306185 |
| 3             | 6             | 0           | -3.686720               | -0.136679 | 0.609940  |
| 4             | 6             | 0           | -2.907200               | -1.281606 | 0.784082  |
| 5             | 6             | 0           | -1.722484               | -1.466042 | 0.065129  |
| 6             | 6             | 0           | -1.291977               | -0.495821 | -0.861416 |
| 7             | 1             | 0           | -1.769453               | 1.421323  | -1.741728 |
| 8             | 1             | 0           | -3.849495               | 1.733977  | -0.459574 |
| 9             | 1             | 0           | -4.604504               | -0.000025 | 1.174416  |
| 10            | 1             | 0           | -3.217745               | -2.048689 | 1.489674  |
| 11            | 1             | 0           | -1.145713               | -2.372139 | 0.222693  |
| 12            | 7             | 0           | -0.147035               | -0.654622 | -1.642848 |
| 13            | 6             | 0           | 0.928475                | -1.568847 | -1.312772 |
| 14            | 1             | 0           | 0.515250                | -2.573509 | -1.159294 |
| 15            | 1             | 0           | 1.578834                | -1.636863 | -2.191370 |
| 16            | 6             | 0           | 1.773689                | -1.193943 | -0.077740 |
| 17            | 1             | 0           | 2.512194                | -1.980805 | 0.113719  |
| 18            | 1             | 0           | 1.147158                | -1.107304 | 0.812125  |
| 19            | 16            | 0           | 2.724277                | 0.366672  | -0.326056 |
| 20            | 6             | 0           | 2.013663                | 1.641569  | 0.752766  |
| 21            | 6             | 0           | 0.931723                | 1.289531  | 1.750944  |
| 22            | 1             | 0           | 0.683629                | 2.197218  | 2.306174  |
| 23            | 1             | 0           | 0.032467                | 0.912953  | 1.252393  |
| 24            | 1             | 0           | 1.279712                | 0.522085  | 2.451726  |
| 25            | 8             | 0           | 2.474855                | 2.756399  | 0.637782  |
| 26            | 1             | 0           | 0.160480                | 0.191028  | -2.107037 |

2\_2

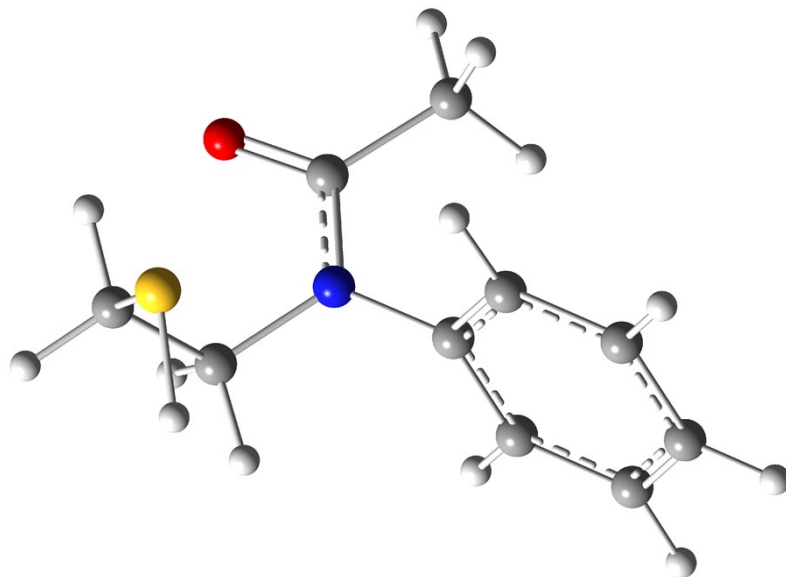

Level of theory: M06-2X/6-311+G(d,p) in PCM (water)//B3LYP/6-31+G(d), 1 atm, 298.15 K

Energy: -916.99090264 hartree/particle

Thermal correction to Gibbs free energy: 0.169799 hartree/particle

Thermal correction to Enthalpy: 0.225847 hartree/particle

Number of imaginary frequencies: 0

| Center Number | Atomic Number | Atomic Type | Coordinates (Angstroms) |           |           |
|---------------|---------------|-------------|-------------------------|-----------|-----------|
|               |               |             | X                       | Y         | Z         |
| 1             | 6             | 0           | -1.327247               | -0.712827 | 1.012105  |
| 2             | 6             | 0           | -2.656493               | -1.089522 | 1.222856  |
| 3             | 6             | 0           | -3.661330               | -0.643683 | 0.359445  |
| 4             | 6             | 0           | -3.333393               | 0.184635  | -0.718127 |
| 5             | 6             | 0           | -2.007027               | 0.571504  | -0.925320 |
| 6             | 6             | 0           | -0.999472               | 0.124731  | -0.059625 |
| 7             | 1             | 0           | -0.536647               | -1.079154 | 1.659242  |
| 8             | 1             | 0           | -2.904210               | -1.739546 | 2.058126  |
| 9             | 1             | 0           | -4.693638               | -0.941497 | 0.523574  |
| 10            | 1             | 0           | -4.109389               | 0.536583  | -1.393062 |
| 11            | 1             | 0           | -1.747008               | 1.226097  | -1.753627 |
| 12            | 6             | 0           | 1.114578                | -0.104645 | -1.389099 |
| 13            | 1             | 0           | 0.402678                | -0.690358 | -1.977650 |
| 14            | 1             | 0           | 1.518710                | 0.689896  | -2.029293 |
| 15            | 6             | 0           | 2.296509                | -0.978680 | -0.951912 |
| 16            | 1             | 0           | 2.975180                | -0.388913 | -0.331765 |
| 17            | 1             | 0           | 2.852134                | -1.293180 | -1.841929 |
| 18            | 16            | 0           | 1.883595                | -2.460685 | 0.057770  |
| 19            | 6             | 0           | 0.957061                | 1.584140  | 0.363657  |
| 20            | 6             | 0           | 0.156716                | 2.284202  | 1.448773  |
| 21            | 1             | 0           | -0.851714               | 2.549347  | 1.116053  |
| 22            | 1             | 0           | 0.050819                | 1.641365  | 2.330175  |
| 23            | 1             | 0           | 0.701861                | 3.185747  | 1.733366  |
| 24            | 8             | 0           | 2.099157                | 1.941218  | 0.074550  |
| 25            | 1             | 0           | 1.150974                | -3.103562 | -0.879541 |
| 26            | 7             | 0           | 0.364481                | 0.521769  | -0.289580 |

ts3

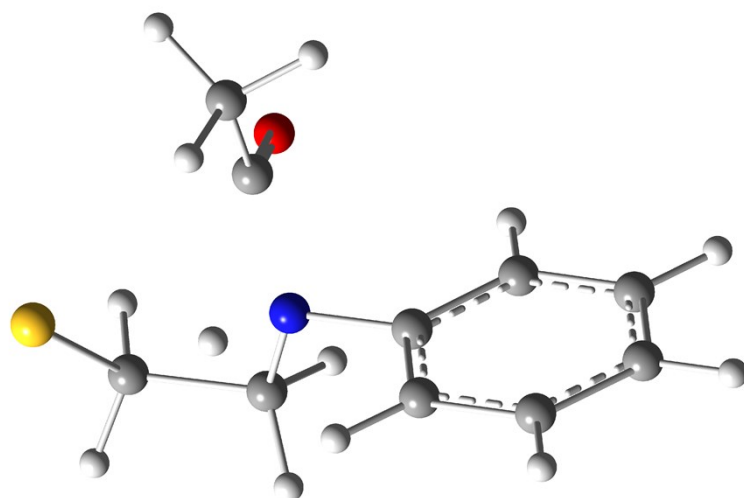

Level of theory: M06-2X/6-311+G(d,p) in PCM (water)//B3LYP/6-31+G(d), 1 atm, 298.15 K

Energy: -916.94273535 hartree/particle

Thermal correction to Gibbs free energy: 0.175404 hartree/particle

Thermal correction to Enthalpy: 0.226746 hartree/particle

Number of imaginary frequencies: 1

IRC calc: OK

| Center Number | Atomic Number | Atomic Type | Coordinates (Angstroms) |           |           |
|---------------|---------------|-------------|-------------------------|-----------|-----------|
|               |               |             | X                       | Y         | Z         |
| 1             | 6             | 0           | -1.707005               | -1.178552 | 0.690448  |
| 2             | 6             | 0           | -3.102490               | -1.213798 | 0.745998  |
| 3             | 6             | 0           | -3.856791               | -0.266661 | 0.048597  |
| 4             | 6             | 0           | -3.214188               | 0.718502  | -0.708090 |
| 5             | 6             | 0           | -1.819959               | 0.761543  | -0.774209 |
| 6             | 6             | 0           | -1.077930               | -0.191540 | -0.071308 |
| 7             | 1             | 0           | -1.113003               | -1.912959 | 1.228711  |
| 8             | 1             | 0           | -3.596078               | -1.981057 | 1.335766  |
| 9             | 1             | 0           | -4.941869               | -0.295242 | 0.094204  |
| 10            | 1             | 0           | -3.797696               | 1.456967  | -1.250754 |
| 11            | 1             | 0           | -1.315910               | 1.525947  | -1.357833 |
| 12            | 6             | 0           | 1.006078                | -0.675452 | -1.397263 |
| 13            | 1             | 0           | 0.560856                | -1.660939 | -1.562102 |
| 14            | 1             | 0           | 0.717916                | -0.000862 | -2.205284 |
| 15            | 6             | 0           | 2.537132                | -0.744557 | -1.185104 |
| 16            | 1             | 0           | 2.996696                | 0.158155  | -1.598725 |
| 17            | 1             | 0           | 2.924500                | -1.605787 | -1.739074 |
| 18            | 16            | 0           | 2.951448                | -0.871952 | 0.601546  |
| 19            | 6             | 0           | 1.021768                | 1.198828  | 0.284575  |
| 20            | 6             | 0           | 0.866878                | 1.536966  | 1.741391  |
| 21            | 1             | 0           | -0.057914               | 2.117315  | 1.872975  |
| 22            | 1             | 0           | 0.836933                | 0.649790  | 2.375373  |
| 23            | 1             | 0           | 1.710921                | 2.162267  | 2.038358  |
| 24            | 8             | 0           | 1.299332                | 1.957430  | -0.610616 |
| 25            | 1             | 0           | 0.852790                | -0.806681 | 0.594524  |
| 26            | 7             | 0           | 0.383295                | -0.169545 | -0.116594 |

## 3\_2

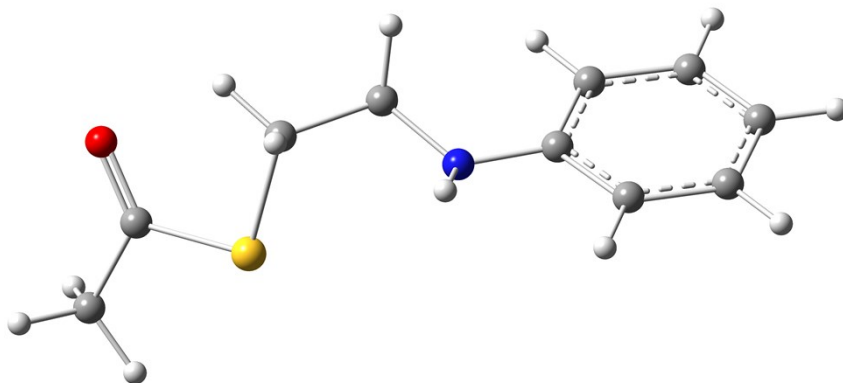

Level of theory: M06-2X/6-311+G(d,p) in PCM (water)//B3LYP/6-31+G(d), 1 atm, 298.15 K

Energy: -916.98203739 hartree/particle

Thermal correction to Gibbs free energy: 0.169531 hartree/particle

Thermal correction to Enthalpy: 0.227644 hartree/particle

Number of imaginary frequencies: 0

| Center<br>Number | Atomic<br>Number | Atomic<br>Type | Coordinates (Angstroms) |           |           |
|------------------|------------------|----------------|-------------------------|-----------|-----------|
|                  |                  |                | X                       | Y         | Z         |
| 1                | 6                | 0              | -2.789890               | -1.991897 | 0.184929  |
| 2                | 6                | 0              | -4.171476               | -2.031095 | 0.023064  |
| 3                | 6                | 0              | -4.833647               | -1.039693 | -0.712066 |
| 4                | 6                | 0              | -4.081353               | -0.012924 | -1.283784 |
| 5                | 6                | 0              | -2.691961               | 0.034978  | -1.133126 |
| 6                | 6                | 0              | -2.024240               | -0.955004 | -0.388384 |
| 7                | 1                | 0              | -2.289324               | -2.762149 | 0.769298  |
| 8                | 1                | 0              | -4.736315               | -2.842181 | 0.476595  |
| 9                | 1                | 0              | -5.912315               | -1.071404 | -0.836476 |
| 10               | 1                | 0              | -4.573998               | 0.764839  | -1.862661 |
| 11               | 1                | 0              | -2.137075               | 0.844018  | -1.596552 |
| 12               | 6                | 0              | 0.243121                | -0.089257 | -0.958517 |
| 13               | 1                | 0              | 0.184451                | -0.326368 | -2.036933 |
| 14               | 1                | 0              | -0.055180               | 0.958088  | -0.839745 |
| 15               | 6                | 0              | 1.694044                | -0.247061 | -0.514276 |
| 16               | 1                | 0              | 2.357761                | 0.344744  | -1.152530 |
| 17               | 1                | 0              | 2.011095                | -1.294768 | -0.573671 |
| 18               | 16               | 0              | 1.988697                | 0.338759  | 1.201543  |
| 19               | 6                | 0              | 3.288667                | 1.555060  | 0.912859  |
| 20               | 6                | 0              | 3.784326                | 2.214086  | 2.184054  |
| 21               | 1                | 0              | 3.754141                | 3.300694  | 2.051592  |
| 22               | 1                | 0              | 3.197845                | 1.933081  | 3.062806  |
| 23               | 1                | 0              | 4.829816                | 1.924494  | 2.341223  |
| 24               | 8                | 0              | 3.731275                | 1.821007  | -0.186051 |
| 25               | 1                | 0              | -0.255340               | -1.834869 | 0.060622  |
| 26               | 7                | 0              | -0.644057               | -0.927129 | -0.168297 |

**with H<sub>2</sub>O**

H<sub>2</sub>O

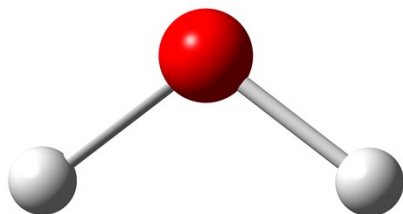

Level of theory: M06-2X/6-311+G(d,p) in PCM (water)//B3LYP/6-31+G(d), 1 atm, 298.15 K

Energy: -76.42874237 hartree/particle

Thermal correction to Gibbs free energy: 0.003434 hartree/particle

Thermal correction to Enthalpy: 0.024874 hartree/particle

Number of imaginary frequencies: 0

| Center<br>Number | Atomic<br>Number | Atomic<br>Type | Coordinates (Angstroms) |           |           |
|------------------|------------------|----------------|-------------------------|-----------|-----------|
|                  |                  |                | X                       | Y         | Z         |
| 1                | 8                | 0              | 0.000000                | 0.000000  | 0.117291  |
| 2                | 1                | 0              | 0.000000                | -0.771299 | -0.469165 |
| 3                | 1                | 0              | 0.000000                | 0.771299  | -0.469165 |



2·H<sub>2</sub>O\_1

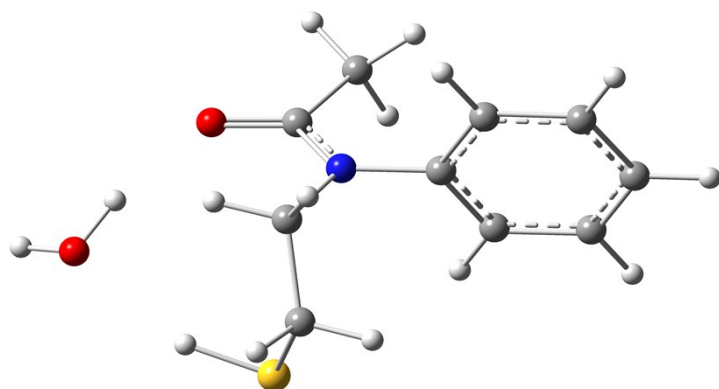

Level of theory: M06-2X/6-311+G(d,p) in PCM (water)//B3LYP/6-31+G(d), 1 atm, 298.15 K

Energy: -993.43270547 hartree/particle

Thermal correction to Gibbs free energy: 0.192556 hartree/particle

Thermal correction to Enthalpy: 0.253858 hartree/particle

Number of imaginary frequencies: 0

| Center Number | Atomic Number | Atomic Type | Coordinates (Angstroms) |           |           |
|---------------|---------------|-------------|-------------------------|-----------|-----------|
|               |               |             | X                       | Y         | Z         |
| 1             | 6             | 0           | -1.621989               | 0.603256  | -0.935365 |
| 2             | 6             | 0           | -2.966027               | 0.931930  | -1.133711 |
| 3             | 6             | 0           | -3.948591               | 0.425753  | -0.278292 |
| 4             | 6             | 0           | -3.584834               | -0.413969 | 0.779257  |
| 5             | 6             | 0           | -2.243772               | -0.751048 | 0.976584  |
| 6             | 6             | 0           | -1.260566               | -0.248107 | 0.115221  |
| 7             | 1             | 0           | -0.848061               | 1.004803  | -1.583339 |
| 8             | 1             | 0           | -3.242437               | 1.590468  | -1.953032 |
| 9             | 1             | 0           | -4.992471               | 0.685708  | -0.432817 |
| 10            | 1             | 0           | -4.344503               | -0.811232 | 1.447397  |
| 11            | 1             | 0           | -1.953897               | -1.411170 | 1.790270  |
| 12            | 7             | 0           | 0.120995                | -0.583218 | 0.340209  |
| 13            | 6             | 0           | 0.819908                | 0.145685  | 1.409004  |
| 14            | 1             | 0           | 0.244400                | 0.026755  | 2.337769  |
| 15            | 1             | 0           | 1.787060                | -0.335366 | 1.552194  |
| 16            | 6             | 0           | 0.999752                | 1.648388  | 1.152757  |
| 17            | 1             | 0           | 1.523134                | 2.077207  | 2.013862  |
| 18            | 1             | 0           | 0.027991                | 2.147609  | 1.081530  |
| 19            | 16            | 0           | 1.885743                | 2.101571  | -0.393879 |
| 20            | 6             | 0           | 0.784941                | -1.518432 | -0.412597 |
| 21            | 6             | 0           | -0.001025               | -2.248634 | -1.486405 |
| 22            | 1             | 0           | -1.007166               | -2.528307 | -1.162648 |
| 23            | 1             | 0           | -0.103129               | -1.613019 | -2.373664 |
| 24            | 1             | 0           | 0.564241                | -3.140256 | -1.763134 |
| 25            | 8             | 0           | 1.981681                | -1.782062 | -0.237593 |
| 26            | 1             | 0           | 3.507827                | -0.896884 | 0.217556  |
| 27            | 8             | 0           | 4.188946                | -0.247580 | 0.500041  |
| 28            | 1             | 0           | 3.013301                | 1.389491  | -0.140696 |
| 29            | 1             | 0           | 5.027804                | -0.550050 | 0.123512  |

## ts4·H<sub>2</sub>O

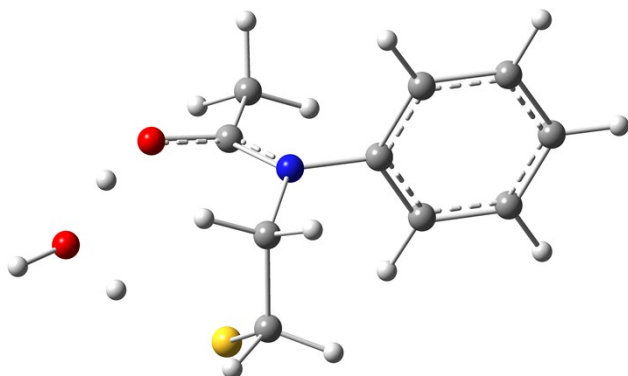

Level of theory: M06-2X/6-311+G(d,p) in PCM (water)//B3LYP/6-31+G(d), 1 atm, 298.15 K

Energy: -993.39782131 hartree/particle

Thermal correction to Gibbs free energy: 0.193431 hartree/particle

Thermal correction to Enthalpy: 0.250346 hartree/particle

Number of imaginary frequencies: 1

IRC calc: OK

| Center Number | Atomic Number | Atomic Type | Coordinates (Angstroms) |           |           |
|---------------|---------------|-------------|-------------------------|-----------|-----------|
|               |               |             | X                       | Y         | Z         |
| 1             | 6             | 0           | -1.596027               | 0.862851  | -0.625895 |
| 2             | 6             | 0           | -2.917970               | 1.131089  | -0.991204 |
| 3             | 6             | 0           | -3.966142               | 0.358125  | -0.482156 |
| 4             | 6             | 0           | -3.695017               | -0.693605 | 0.397914  |
| 5             | 6             | 0           | -2.376990               | -0.970463 | 0.770724  |
| 6             | 6             | 0           | -1.336475               | -0.192950 | 0.254318  |
| 7             | 1             | 0           | -0.764335               | 1.437334  | -1.027895 |
| 8             | 1             | 0           | -3.126015               | 1.947207  | -1.678054 |
| 9             | 1             | 0           | -4.991527               | 0.574404  | -0.770408 |
| 10            | 1             | 0           | -4.505951               | -1.297203 | 0.796621  |
| 11            | 1             | 0           | -2.151583               | -1.780623 | 1.459256  |
| 12            | 7             | 0           | 0.015937                | -0.477177 | 0.682325  |
| 13            | 6             | 0           | 0.619754                | 0.420370  | 1.690841  |
| 14            | 1             | 0           | -0.144206               | 0.625994  | 2.447126  |
| 15            | 1             | 0           | 1.437322                | -0.128775 | 2.156186  |
| 16            | 6             | 0           | 1.135571                | 1.749855  | 1.061777  |
| 17            | 1             | 0           | 1.816489                | 2.184810  | 1.803595  |
| 18            | 1             | 0           | 0.292856                | 2.444255  | 0.968557  |
| 19            | 16            | 0           | 1.949239                | 1.642685  | -0.581815 |
| 20            | 6             | 0           | 0.825073                | -1.268900 | -0.015304 |
| 21            | 6             | 0           | 0.404039                | -1.922366 | -1.299210 |
| 22            | 1             | 0           | 0.052682                | -2.940104 | -1.082956 |
| 23            | 1             | 0           | -0.381249               | -1.375628 | -1.819653 |
| 24            | 1             | 0           | 1.283082                | -2.006468 | -1.943613 |
| 25            | 8             | 0           | 1.955818                | -1.619547 | 0.520364  |
| 26            | 1             | 0           | 2.872305                | -1.316555 | -0.028201 |
| 27            | 8             | 0           | 3.852890                | -0.620952 | -0.608763 |
| 28            | 1             | 0           | 3.330782                | 0.301364  | -0.571563 |
| 29            | 1             | 0           | 4.635396                | -0.532776 | -0.039870 |

int2·H<sub>2</sub>O\_1

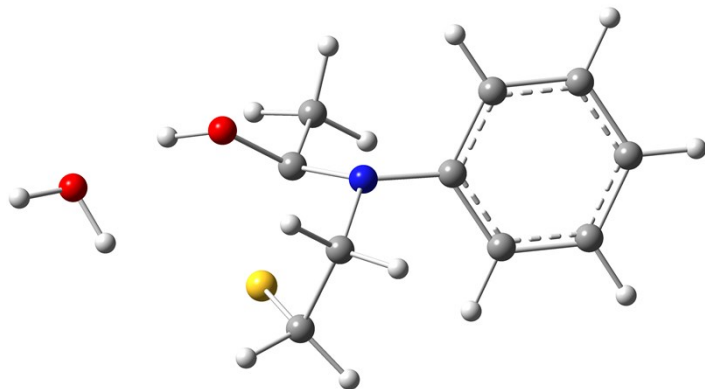

Level of theory: M06-2X/6-311+G(d,p) in PCM (water)//B3LYP/6-31+G(d), 1 atm, 298.15 K

Energy: -993.41215574 hartree/particle

Thermal correction to Gibbs free energy: 0.197601 hartree/particle

Thermal correction to Enthalpy: 0.255876 hartree/particle

Number of imaginary frequencies: 0

| Center Number | Atomic Number | Atomic Type | Coordinates (Angstroms) |           |           |
|---------------|---------------|-------------|-------------------------|-----------|-----------|
|               |               |             | X                       | Y         | Z         |
| 1             | 6             | 0           | -1.893146               | 1.160100  | -0.202716 |
| 2             | 6             | 0           | -3.206313               | 1.273091  | -0.668036 |
| 3             | 6             | 0           | -4.062459               | 0.169247  | -0.643511 |
| 4             | 6             | 0           | -3.599574               | -1.049514 | -0.137652 |
| 5             | 6             | 0           | -2.294756               | -1.159303 | 0.345974  |
| 6             | 6             | 0           | -1.424541               | -0.059401 | 0.310016  |
| 7             | 1             | 0           | -1.230433               | 2.017962  | -0.253186 |
| 8             | 1             | 0           | -3.554867               | 2.224831  | -1.061520 |
| 9             | 1             | 0           | -5.081855               | 0.259020  | -1.009684 |
| 10            | 1             | 0           | -4.260527               | -1.911987 | -0.101798 |
| 11            | 1             | 0           | -1.937597               | -2.092051 | 0.772650  |
| 12            | 7             | 0           | -0.103278               | -0.222509 | 0.838807  |
| 13            | 6             | 0           | 0.437597                | 0.835555  | 1.693574  |
| 14            | 1             | 0           | -0.386243               | 1.355587  | 2.188280  |
| 15            | 1             | 0           | 1.058731                | 0.365107  | 2.459796  |
| 16            | 6             | 0           | 1.322122                | 1.815019  | 0.858672  |
| 17            | 1             | 0           | 2.199316                | 2.126520  | 1.432130  |
| 18            | 1             | 0           | 0.772667                | 2.713188  | 0.561035  |
| 19            | 16            | 0           | 1.822776                | 0.909170  | -0.659027 |
| 20            | 6             | 0           | 0.944615                | -0.726866 | -0.000490 |
| 21            | 6             | 0           | 0.525047                | -1.556387 | -1.206401 |
| 22            | 1             | 0           | 0.056712                | -2.485221 | -0.865422 |
| 23            | 1             | 0           | -0.165700               | -1.017621 | -1.858304 |
| 24            | 1             | 0           | 1.417927                | -1.820491 | -1.781857 |
| 25            | 8             | 0           | 1.834275                | -1.420140 | 0.830790  |
| 26            | 1             | 0           | 2.694141                | -1.542769 | 0.371657  |
| 27            | 8             | 0           | 4.303899                | -1.177173 | -0.522805 |
| 28            | 1             | 0           | 4.008114                | -0.249075 | -0.626211 |
| 29            | 1             | 0           | 5.115151                | -1.150201 | 0.006774  |

int2·H<sub>2</sub>O\_2

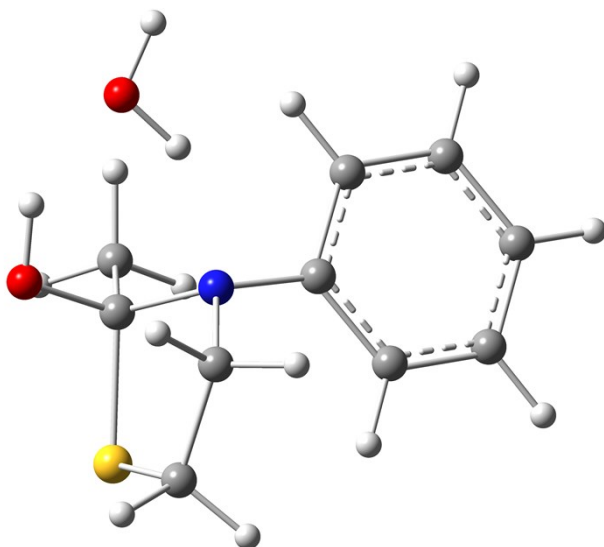

Level of theory: M06-2X/6-311+G(d,p) in PCM (water)//B3LYP/6-31+G(d), 1 atm, 298.15 K

Energy: -993.41461066 hartree/particle

Thermal correction to Gibbs free energy: 0.198285 hartree/particle

Thermal correction to Enthalpy: 0.25583 hartree/particle

Number of imaginary frequencies: 0

| Center Number | Atomic Number | Atomic Type | Coordinates (Angstroms) |           |           |
|---------------|---------------|-------------|-------------------------|-----------|-----------|
|               |               |             | X                       | Y         | Z         |
| 1             | 6             | 0           | -1.930770               | 1.014647  | 0.193628  |
| 2             | 6             | 0           | -3.284642               | 0.707402  | 0.338211  |
| 3             | 6             | 0           | -3.755653               | -0.565043 | 0.003192  |
| 4             | 6             | 0           | -2.857300               | -1.525161 | -0.467752 |
| 5             | 6             | 0           | -1.498785               | -1.223254 | -0.596847 |
| 6             | 6             | 0           | -1.018976               | 0.053471  | -0.268430 |
| 7             | 1             | 0           | -1.572292               | 2.009062  | 0.444071  |
| 8             | 1             | 0           | -3.972063               | 1.467504  | 0.700694  |
| 9             | 1             | 0           | -4.810666               | -0.804495 | 0.105832  |
| 10            | 1             | 0           | -3.209333               | -2.520227 | -0.727874 |
| 11            | 1             | 0           | -0.815275               | -1.990591 | -0.941709 |
| 12            | 7             | 0           | 0.366394                | 0.437320  | -0.412476 |
| 13            | 6             | 0           | 1.083152                | -0.123941 | -1.579711 |
| 14            | 1             | 0           | 0.374233                | -0.261943 | -2.399612 |
| 15            | 1             | 0           | 1.829037                | 0.610466  | -1.891441 |
| 16            | 6             | 0           | 1.811953                | -1.447181 | -1.205795 |
| 17            | 1             | 0           | 2.818000                | -1.461085 | -1.632667 |
| 18            | 1             | 0           | 1.276883                | -2.333306 | -1.561162 |
| 19            | 16            | 0           | 1.894484                | -1.501210 | 0.628479  |
| 20            | 6             | 0           | 1.255661                | 0.251246  | 0.763753  |
| 21            | 6             | 0           | 0.588699                | 0.464503  | 2.118604  |
| 22            | 1             | 0           | 0.240969                | 1.500036  | 2.206906  |
| 23            | 1             | 0           | -0.253472               | -0.210956 | 2.282193  |
| 24            | 1             | 0           | 1.339715                | 0.294792  | 2.895090  |
| 25            | 1             | 0           | 0.476934                | 2.387727  | -0.722522 |
| 26            | 1             | 0           | 2.074047                | 2.012585  | 0.489998  |
| 27            | 8             | 0           | 2.382451                | 1.090201  | 0.615370  |
| 28            | 8             | 0           | 0.961704                | 3.236625  | -0.598232 |
| 29            | 1             | 0           | 0.305801                | 3.949030  | -0.595699 |

ts5·H<sub>2</sub>O

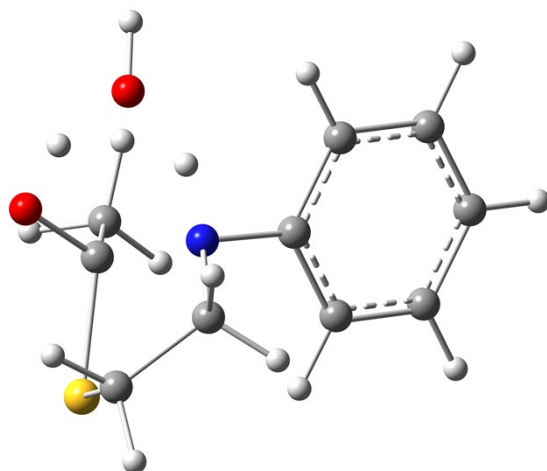

Level of theory: M06-2X/6-311+G(d,p) in PCM (water)//B3LYP/6-31+G(d), 1 atm, 298.15 K

Energy: -993.38414345 hartree/particle

Thermal correction to Gibbs free energy: 0.195081 hartree/particle

Thermal correction to Enthalpy: 0.249531 hartree/particle

Number of imaginary frequencies: 1

IRC calc: OK

| Center Number | Atomic Number | Atomic Type | Coordinates (Angstroms) |           |           |
|---------------|---------------|-------------|-------------------------|-----------|-----------|
|               |               |             | X                       | Y         | Z         |
| 1             | 6             | 0           | -1.981355               | 1.163886  | -0.153114 |
| 2             | 6             | 0           | -3.346144               | 0.919082  | 0.022948  |
| 3             | 6             | 0           | -3.822093               | -0.392063 | 0.086942  |
| 4             | 6             | 0           | -2.926715               | -1.460450 | -0.028260 |
| 5             | 6             | 0           | -1.562541               | -1.224275 | -0.206279 |
| 6             | 6             | 0           | -1.090699               | 0.092304  | -0.265237 |
| 7             | 1             | 0           | -1.608670               | 2.182086  | -0.213251 |
| 8             | 1             | 0           | -4.034043               | 1.756271  | 0.104796  |
| 9             | 1             | 0           | -4.883443               | -0.582008 | 0.221961  |
| 10            | 1             | 0           | -3.289355               | -2.483691 | 0.022278  |
| 11            | 1             | 0           | -0.865211               | -2.053142 | -0.278502 |
| 12            | 7             | 0           | 0.326882                | 0.390683  | -0.444565 |
| 13            | 6             | 0           | 0.938789                | -0.224432 | -1.686424 |
| 14            | 1             | 0           | 0.210846                | -0.915661 | -2.112599 |
| 15            | 1             | 0           | 1.118845                | 0.586089  | -2.398552 |
| 16            | 6             | 0           | 2.237764                | -0.959511 | -1.323125 |
| 17            | 1             | 0           | 3.097921                | -0.287127 | -1.337073 |
| 18            | 1             | 0           | 2.417902                | -1.796705 | -2.002229 |
| 19            | 16            | 0           | 1.992049                | -1.581486 | 0.376455  |
| 20            | 6             | 0           | 1.311789                | 0.104051  | 0.812053  |
| 21            | 6             | 0           | 0.549175                | 0.077245  | 2.131357  |
| 22            | 1             | 0           | 0.066327                | 1.046352  | 2.298126  |
| 23            | 1             | 0           | -0.199328               | -0.716164 | 2.188522  |
| 24            | 1             | 0           | 1.289150                | -0.067519 | 2.923806  |
| 25            | 1             | 0           | 0.464401                | 1.523590  | -0.548442 |
| 26            | 1             | 0           | 1.902313                | 1.973188  | 0.257452  |
| 27            | 8             | 0           | 2.275272                | 1.045421  | 0.765545  |
| 28            | 8             | 0           | 1.163817                | 2.744064  | -0.551479 |
| 29            | 1             | 0           | 0.790861                | 3.512539  | -0.095307 |

## NBO analysis of **ts5·H<sub>2</sub>O** (excerpt)

### Second Order Perturbation Theory Analysis of Fock Matrix in NBO Basis

Threshold for printing: 0.50 kcal/mol  
 (Intermolecular threshold: 0.05 kcal/mol)

| Donor NBO (i)         | Acceptor NBO (j)   | E(2)<br>kcal/mol | E(j)-E(i)<br>a. u. | F(i, j)<br>a. u. |
|-----------------------|--------------------|------------------|--------------------|------------------|
| =====                 |                    |                  |                    |                  |
| from unit 1 to unit 2 |                    |                  |                    |                  |
| 49. LP ( 1) N 12      | / 52. LP*( 1) H 25 | 327.09           | 0.50               | 0.374            |
| 49. LP ( 1) N 12      | /328. RY*( 1) H 25 | 3.47             | 2.90               | 0.099            |
| 49. LP ( 1) N 12      | /329. RY*( 2) H 25 | 1.21             | 1.58               | 0.043            |
| 49. LP ( 1) N 12      | /330. RY*( 3) H 25 | 0.10             | 2.82               | 0.016            |
| 49. LP ( 1) N 12      | /332. RY*( 5) H 25 | 0.20             | 2.29               | 0.021            |
|                       |                    |                  |                    |                  |
| from unit 4 to unit 3 |                    |                  |                    |                  |
| 57. LP ( 1) O 28      | / 53. LP*( 1) H 26 | 3.91             | 0.69               | 0.053            |
| 57. LP ( 1) O 28      | /333. RY*( 1) H 26 | 0.72             | 2.72               | 0.040            |
| 57. LP ( 1) O 28      | /335. RY*( 3) H 26 | 0.15             | 2.23               | 0.016            |
| 58. LP ( 2) O 28      | / 53. LP*( 1) H 26 | 23.17            | 0.49               | 0.104            |
| 58. LP ( 2) O 28      | /334. RY*( 2) H 26 | 0.42             | 2.81               | 0.032            |
| 58. LP ( 2) O 28      | /336. RY*( 4) H 26 | 0.07             | 2.36               | 0.012            |
| 58. LP ( 2) O 28      | /337. RY*( 5) H 26 | 0.13             | 1.58               | 0.013            |
| 59. LP ( 3) O 28      | / 53. LP*( 1) H 26 | 117.04           | 0.78               | 0.290            |
| 59. LP ( 3) O 28      | /333. RY*( 1) H 26 | 0.72             | 2.81               | 0.042            |
| 59. LP ( 3) O 28      | /334. RY*( 2) H 26 | 0.81             | 3.10               | 0.047            |
| 59. LP ( 3) O 28      | /336. RY*( 4) H 26 | 0.30             | 2.66               | 0.027            |
| 59. LP ( 3) O 28      | /337. RY*( 5) H 26 | 0.22             | 1.87               | 0.019            |

3·H<sub>2</sub>O\_1

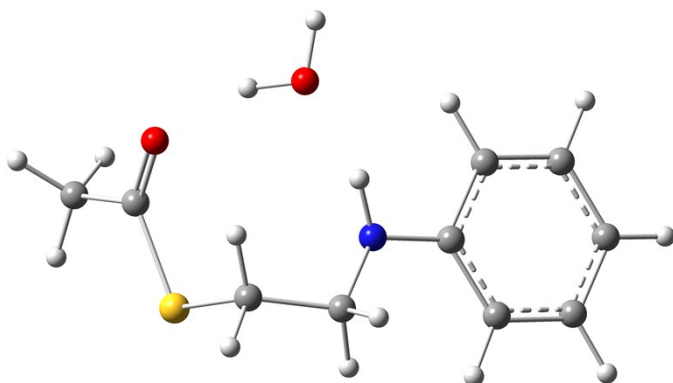

Level of theory: M06-2X/6-311+G(d,p) in PCM (water)//B3LYP/6-31+G(d), 1 atm, 298.15 K

Energy: -993.42144847 hartree/particle

Thermal correction to Gibbs free energy: 0.191080 hartree/particle

Thermal correction to Enthalpy: 0.255393 hartree/particle

Number of imaginary frequencies: 0

| Center Number | Atomic Number | Atomic Type | Coordinates (Angstroms) |           |           |
|---------------|---------------|-------------|-------------------------|-----------|-----------|
|               |               |             | X                       | Y         | Z         |
| 1             | 6             | 0           | -2.581206               | 1.075948  | -0.361165 |
| 2             | 6             | 0           | -3.968880               | 0.984928  | -0.392237 |
| 3             | 6             | 0           | -4.601424               | -0.179240 | -0.848107 |
| 4             | 6             | 0           | -3.809723               | -1.244834 | -1.277620 |
| 5             | 6             | 0           | -2.413643               | -1.163973 | -1.257413 |
| 6             | 6             | 0           | -1.771652               | -0.001049 | -0.787544 |
| 7             | 1             | 0           | -2.101637               | 1.981758  | 0.003427  |
| 8             | 1             | 0           | -4.563654               | 1.831555  | -0.056392 |
| 9             | 1             | 0           | -5.685395               | -0.248569 | -0.871122 |
| 10            | 1             | 0           | -4.277134               | -2.156244 | -1.643935 |
| 11            | 1             | 0           | -1.835290               | -2.010221 | -1.613384 |
| 12            | 7             | 0           | -0.386224               | 0.128427  | -0.689570 |
| 13            | 6             | 0           | 0.519651                | -0.786035 | -1.350955 |
| 14            | 1             | 0           | 0.202740                | -1.815469 | -1.153937 |
| 15            | 1             | 0           | 0.521673                | -0.657224 | -2.449941 |
| 16            | 6             | 0           | 1.962896                | -0.610207 | -0.865371 |
| 17            | 1             | 0           | 2.283884                | 0.433920  | -0.915850 |
| 18            | 1             | 0           | 2.635868                | -1.202326 | -1.493059 |
| 19            | 16            | 0           | 2.232405                | -1.191648 | 0.856826  |
| 20            | 6             | 0           | 2.495521                | 0.309698  | 1.776669  |
| 21            | 6             | 0           | 2.706171                | 0.076449  | 3.258289  |
| 22            | 1             | 0           | 1.845087                | 0.488967  | 3.797274  |
| 23            | 1             | 0           | 2.810154                | -0.981883 | 3.510781  |
| 24            | 1             | 0           | 3.598035                | 0.624690  | 3.578942  |
| 25            | 1             | 0           | -0.065038               | 1.096028  | -0.700175 |
| 26            | 1             | 0           | 1.633148                | 2.524700  | 0.039881  |
| 27            | 8             | 0           | 2.512987                | 1.430835  | 1.291335  |
| 28            | 8             | 0           | 1.057101                | 2.775250  | -0.709156 |
| 29            | 1             | 0           | 0.878947                | 3.722635  | -0.622017 |

## 2\_H<sub>2</sub>O\_2

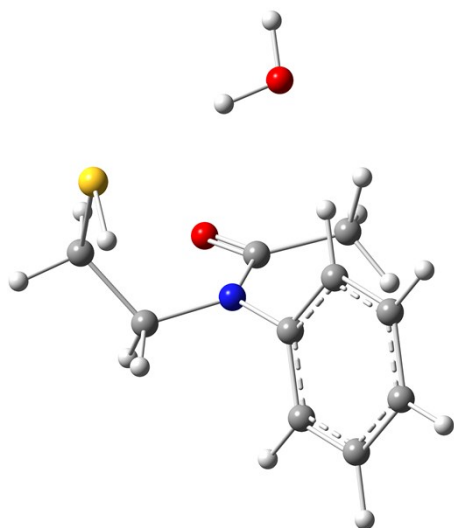

Level of theory: M06-2X/6-311+G(d,p) in PCM (water)//B3LYP/6-31+G(d), 1 atm, 298.15 K

Energy: -993.42536118 hartree/particle

Thermal correction to Gibbs free energy: 0.189581 hartree/particle

Thermal correction to Enthalpy: 0.253298 hartree/particle

Number of imaginary frequencies: 0

| Center Number | Atomic Number | Atomic Type | Coordinates (Angstroms) |           |           |
|---------------|---------------|-------------|-------------------------|-----------|-----------|
|               |               |             | X                       | Y         | Z         |
| 1             | 6             | 0           | -2.110817               | -0.972654 | -0.844209 |
| 2             | 6             | 0           | -3.438417               | -0.540859 | -0.877418 |
| 3             | 6             | 0           | -3.812692               | 0.627229  | -0.206301 |
| 4             | 6             | 0           | -2.849239               | 1.360558  | 0.491132  |
| 5             | 6             | 0           | -1.515261               | 0.942540  | 0.515618  |
| 6             | 6             | 0           | -1.142662               | -0.230734 | -0.150970 |
| 7             | 1             | 0           | -1.822983               | -1.891736 | -1.348699 |
| 8             | 1             | 0           | -4.180368               | -1.124085 | -1.417000 |
| 9             | 1             | 0           | -4.846759               | 0.961309  | -0.226373 |
| 10            | 1             | 0           | -3.130103               | 2.270584  | 1.015212  |
| 11            | 1             | 0           | -0.770469               | 1.519929  | 1.053757  |
| 12            | 6             | 0           | 0.911415                | -0.823082 | -1.441757 |
| 13            | 1             | 0           | 1.174026                | -1.877937 | -1.599357 |
| 14            | 1             | 0           | 0.200038                | -0.530622 | -2.218517 |
| 15            | 6             | 0           | 2.211268                | -0.024938 | -1.604995 |
| 16            | 1             | 0           | 2.609797                | -0.222780 | -2.605611 |
| 17            | 1             | 0           | 2.947558                | -0.359780 | -0.872358 |
| 18            | 16            | 0           | 2.102557                | 1.799205  | -1.368286 |
| 19            | 6             | 0           | 0.844739                | -1.230987 | 0.959398  |
| 20            | 6             | 0           | 0.119857                | -1.181792 | 2.289241  |
| 21            | 1             | 0           | 0.623415                | -1.876695 | 2.964011  |
| 22            | 1             | 0           | 0.186358                | -0.171117 | 2.707576  |
| 23            | 1             | 0           | -0.938658               | -1.444585 | 2.205199  |
| 24            | 8             | 0           | 1.964483                | -1.733029 | 0.855184  |
| 25            | 7             | 0           | 0.224274                | -0.681274 | -0.150068 |
| 26            | 8             | 0           | 1.166712                | 2.313775  | 1.891514  |
| 27            | 1             | 0           | 1.873680                | 2.739431  | 2.399077  |
| 28            | 1             | 0           | 0.995115                | 2.021375  | -2.110107 |
| 29            | 1             | 0           | 1.519667                | 2.199160  | 0.986880  |



ts6·H<sub>2</sub>O

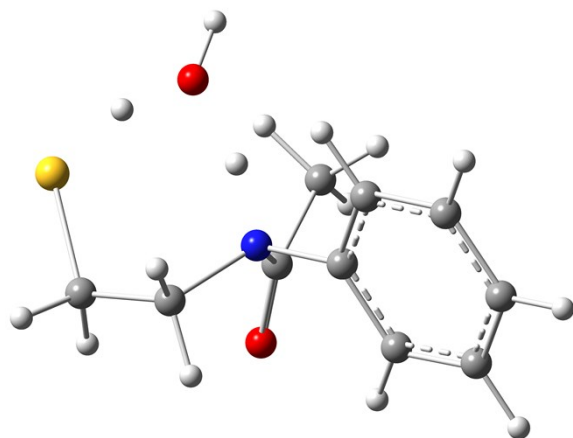

Level of theory: M06-2X/6-311+G(d,p) in PCM (water)//B3LYP/6-31+G(d), 1 atm, 298.15 K

Energy: -993.37630302 hartree/particle

Thermal correction to Gibbs free energy: 0.190641 hartree/particle

Thermal correction to Enthalpy: 0.247783 hartree/particle

Number of imaginary frequencies: 1

IRC calc: OK

| Center Number | Atomic Number | Atomic Type | Coordinates (Angstroms) |           |           |
|---------------|---------------|-------------|-------------------------|-----------|-----------|
|               |               |             | X                       | Y         | Z         |
| 1             | 6             | 0           | -2.059076               | -1.054119 | -0.402063 |
| 2             | 6             | 0           | -3.447005               | -0.903383 | -0.453281 |
| 3             | 6             | 0           | -4.031742               | 0.342072  | -0.207610 |
| 4             | 6             | 0           | -3.224443               | 1.443296  | 0.088572  |
| 5             | 6             | 0           | -1.835110               | 1.306285  | 0.147451  |
| 6             | 6             | 0           | -1.263686               | 0.053490  | -0.093826 |
| 7             | 1             | 0           | -1.605559               | -2.019956 | -0.601005 |
| 8             | 1             | 0           | -4.068736               | -1.762722 | -0.688712 |
| 9             | 1             | 0           | -5.111724               | 0.453880  | -0.250157 |
| 10            | 1             | 0           | -3.672357               | 2.415690  | 0.274101  |
| 11            | 1             | 0           | -1.195535               | 2.155822  | 0.367919  |
| 12            | 6             | 0           | 0.822344                | 0.002999  | -1.443774 |
| 13            | 1             | 0           | 0.293516                | -0.717221 | -2.074949 |
| 14            | 1             | 0           | 0.581963                | 1.013847  | -1.784478 |
| 15            | 6             | 0           | 2.334127                | -0.254108 | -1.491928 |
| 16            | 1             | 0           | 2.658298                | 0.100122  | -2.478044 |
| 17            | 1             | 0           | 2.519892                | -1.330595 | -1.459146 |
| 18            | 16            | 0           | 3.365387                | 0.534474  | -0.179826 |
| 19            | 6             | 0           | 0.629001                | -1.283627 | 0.721337  |
| 20            | 6             | 0           | 0.715018                | -1.071731 | 2.205900  |
| 21            | 1             | 0           | 1.616168                | -0.485753 | 2.418492  |
| 22            | 1             | 0           | -0.154285               | -0.518185 | 2.577721  |
| 23            | 1             | 0           | 0.786722                | -2.040303 | 2.703610  |
| 24            | 8             | 0           | 0.819591                | -2.317323 | 0.136003  |
| 25            | 7             | 0           | 0.210884                | -0.064138 | -0.050375 |
| 26            | 8             | 0           | 1.183377                | 2.109344  | 0.769471  |
| 27            | 1             | 0           | 1.312806                | 2.307972  | 1.711104  |
| 28            | 1             | 0           | 2.250298                | 1.600247  | 0.359093  |
| 29            | 1             | 0           | 0.605847                | 0.901324  | 0.485821  |

## NBO analysis of $\text{ts6}\cdot\text{H}_2\text{O}$ (excerpt)

### Second Order Perturbation Theory Analysis of Fock Matrix in NBO Basis

Threshold for printing: 0.50 kcal/mol  
 (Intermolecular threshold: 0.05 kcal/mol)

| Donor NBO (i)         | Acceptor NBO (j)   | E(2)<br>kcal/mol | E(j)-E(i)<br>a. u. | F(i, j)<br>a. u. |
|-----------------------|--------------------|------------------|--------------------|------------------|
| =====                 |                    |                  |                    |                  |
| from unit 1 to unit 3 |                    |                  |                    |                  |
| 54. LP ( 1) N 25      | / 58. LP*( 1) H 29 | 291.17           | 0.51               | 0.359            |
| 54. LP ( 1) N 25      | /371. RY*( 1) H 29 | 2.98             | 2.96               | 0.092            |
| 54. LP ( 1) N 25      | /372. RY*( 2) H 29 | 1.93             | 1.29               | 0.049            |
| from unit 2 to unit 1 |                    |                  |                    |                  |
| 55. LP ( 1) O 26      | /366. RY*( 1) H 28 | 0.37             | 2.27               | 0.026            |
| 55. LP ( 1) O 26      | /367. RY*( 2) H 28 | 0.47             | 2.11               | 0.028            |
| 55. LP ( 1) O 26      | /368. RY*( 3) H 28 | 0.14             | 2.74               | 0.017            |
| 55. LP ( 1) O 26      | /369. RY*( 4) H 28 | 0.21             | 2.11               | 0.019            |
| 55. LP ( 1) O 26      | /370. RY*( 5) H 28 | 0.12             | 2.02               | 0.014            |

3·H<sub>2</sub>O\_2

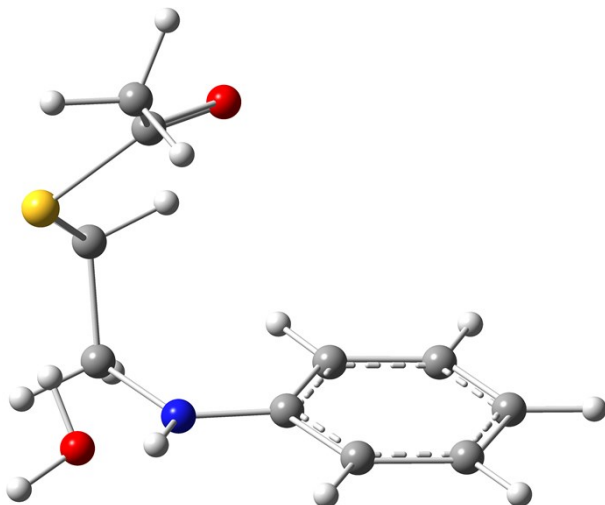

Level of theory: M06-2X/6-311+G(d,p) in PCM (water)//B3LYP/6-31+G(d), 1 atm, 298.15 K

Energy: -993.41890647 hartree/particle

Thermal correction to Gibbs free energy: 0.188893 hartree/particle

Thermal correction to Enthalpy: 0.254956 hartree/particle

Number of imaginary frequencies: 0

| Center Number | Atomic Number | Atomic Type | Coordinates (Angstroms) |           |           |
|---------------|---------------|-------------|-------------------------|-----------|-----------|
|               |               |             | X                       | Y         | Z         |
| 1             | 6             | 0           | 2.000788                | 0.300586  | -1.563197 |
| 2             | 6             | 0           | 3.329674                | -0.108559 | -1.515778 |
| 3             | 6             | 0           | 4.105943                | 0.100841  | -0.368576 |
| 4             | 6             | 0           | 3.517445                | 0.727735  | 0.730819  |
| 5             | 6             | 0           | 2.183274                | 1.142835  | 0.698354  |
| 6             | 6             | 0           | 1.400612                | 0.941898  | -0.456458 |
| 7             | 1             | 0           | 1.409261                | 0.133621  | -2.461023 |
| 8             | 1             | 0           | 3.763793                | -0.598112 | -2.384747 |
| 9             | 1             | 0           | 5.142594                | -0.222100 | -0.333848 |
| 10            | 1             | 0           | 4.097191                | 0.895554  | 1.635752  |
| 11            | 1             | 0           | 1.759764                | 1.620586  | 1.576454  |
| 12            | 7             | 0           | 0.085944                | 1.373939  | -0.563140 |
| 13            | 6             | 0           | -0.701619               | 1.892839  | 0.526117  |
| 14            | 1             | 0           | -0.120440               | 2.643654  | 1.079818  |
| 15            | 1             | 0           | -1.553550               | 2.429642  | 0.093253  |
| 16            | 6             | 0           | -1.206328               | 0.859596  | 1.558547  |
| 17            | 1             | 0           | -1.666549               | 1.374635  | 2.408687  |
| 18            | 1             | 0           | -0.391732               | 0.230225  | 1.930773  |
| 19            | 16            | 0           | -2.462844               | -0.299275 | 0.882695  |
| 20            | 6             | 0           | -1.670578               | -1.911344 | 1.169150  |
| 21            | 8             | 0           | -0.635873               | -2.033590 | 1.781196  |
| 22            | 1             | 0           | -2.421318               | -0.023973 | -1.663921 |
| 23            | 1             | 0           | -0.425329               | 1.083282  | -1.389873 |
| 24            | 6             | 0           | -2.432255               | -3.067855 | 0.558063  |
| 25            | 1             | 0           | -3.488780               | -2.833280 | 0.399373  |
| 26            | 1             | 0           | -1.977998               | -3.307413 | -0.411428 |
| 27            | 1             | 0           | -2.333824               | -3.942497 | 1.207226  |
| 28            | 8             | 0           | -1.973439               | 0.271486  | -2.477747 |
| 29            | 1             | 0           | -2.661497               | 0.643078  | -3.049853 |

**with  $H_2PO_4^-$**

$H_2PO_4^-$

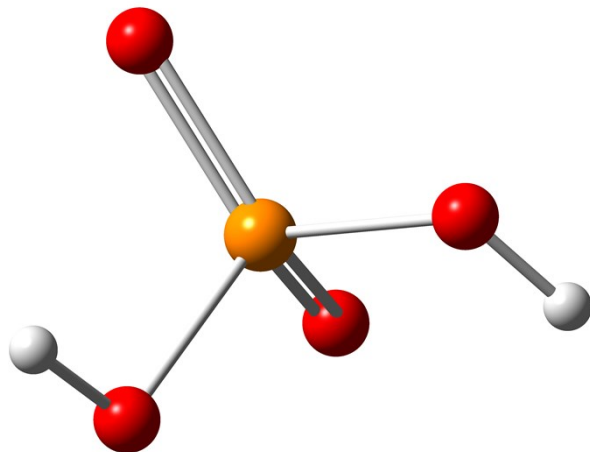

Level of theory: M06-2X/6-311+G(d,p) in PCM (water)//B3LYP/6-31+G(d), 1 atm, 298.15 K

Energy: -643.70849982 hartree/particle

Thermal correction to Gibbs free energy: 0.007783 hartree/particle

Thermal correction to Enthalpy: 0.043145 hartree/particle

Number of imaginary frequencies: 0

| Center Number | Atomic Number | Atomic Type | Coordinates (Angstroms) |           |           |
|---------------|---------------|-------------|-------------------------|-----------|-----------|
|               |               |             | X                       | Y         | Z         |
| 1             | 15            | 0           | -0.000017               | 0.000248  | 0.175623  |
| 2             | 8             | 0           | -0.994052               | 0.834419  | -0.896105 |
| 3             | 1             | 0           | -1.773986               | 0.272313  | -1.025711 |
| 4             | 8             | 0           | 0.994392                | -0.836854 | -0.893568 |
| 5             | 1             | 0           | 1.774334                | -0.275133 | -1.024667 |
| 6             | 8             | 0           | 0.871425                | 1.024005  | 0.857136  |
| 7             | 8             | 0           | -0.871777               | -1.021683 | 0.859542  |

## 2·H<sub>2</sub>PO<sub>4</sub><sup>-</sup>\_1

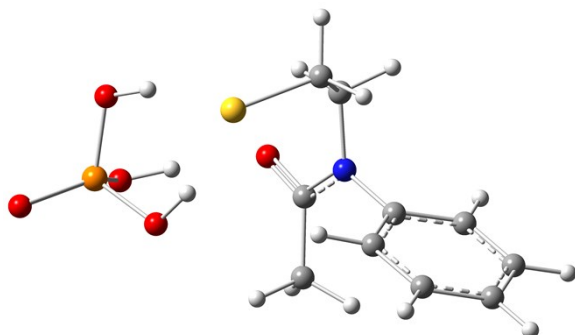

Level of theory: M06-2X/6-311+G(d,p) in PCM (water)//B3LYP/6-31+G(d), 1 atm, 298.15 K

Energy: -1560.71942067 hartree/particle

Thermal correction to Gibbs free energy: 0.202788 hartree/particle

Thermal correction to Enthalpy: 0.272288 hartree/particle

Number of imaginary frequencies: 0

| Center Number | Atomic Number | Atomic Type | Coordinates (Angstroms) |           |           |
|---------------|---------------|-------------|-------------------------|-----------|-----------|
|               |               |             | X                       | Y         | Z         |
| 1             | 6             | 0           | 2.437360                | 0.720896  | 0.868289  |
| 2             | 6             | 0           | 3.660405                | 0.989944  | 1.489392  |
| 3             | 6             | 0           | 4.834085                | 0.373293  | 1.045187  |
| 4             | 6             | 0           | 4.785961                | -0.514400 | -0.034621 |
| 5             | 6             | 0           | 3.566601                | -0.785126 | -0.660838 |
| 6             | 6             | 0           | 2.388946                | -0.178833 | -0.202935 |
| 7             | 1             | 0           | 1.518890                | 1.213483  | 1.180888  |
| 8             | 1             | 0           | 3.692883                | 1.688919  | 2.321825  |
| 9             | 1             | 0           | 5.782148                | 0.585569  | 1.534510  |
| 10            | 1             | 0           | 5.694952                | -0.994967 | -0.389629 |
| 11            | 1             | 0           | 3.515417                | -1.474050 | -1.500691 |
| 12            | 7             | 0           | 1.144542                | -0.463987 | -0.863228 |
| 13            | 6             | 0           | 0.729142                | 0.436576  | -1.960107 |
| 14            | 1             | 0           | 1.462481                | 0.335030  | -2.777915 |
| 15            | 1             | 0           | -0.230074               | 0.056481  | -2.312213 |
| 16            | 6             | 0           | 0.613217                | 1.915849  | -1.572275 |
| 17            | 1             | 0           | 0.340635                | 2.444110  | -2.496088 |
| 18            | 1             | 0           | 1.601308                | 2.297512  | -1.282753 |
| 19            | 16            | 0           | -0.601111               | 2.354634  | -0.256127 |
| 20            | 6             | 0           | 0.373436                | -1.548671 | -0.550063 |
| 21            | 6             | 0           | 0.720697                | -2.355745 | 0.685773  |
| 22            | 1             | 0           | 1.782609                | -2.352819 | 0.939511  |
| 23            | 1             | 0           | 0.158337                | -1.924135 | 1.523067  |
| 24            | 1             | 0           | 0.372448                | -3.380297 | 0.534490  |
| 25            | 8             | 0           | -0.623498               | -1.852179 | -1.225975 |
| 26            | 1             | 0           | -2.238974               | -1.862791 | -0.434612 |
| 27            | 8             | 0           | -3.054187               | -1.772262 | 0.114657  |
| 28            | 15            | 0           | -3.183770               | -0.311094 | 0.795003  |
| 29            | 8             | 0           | -1.719006               | -0.024216 | 1.426424  |
| 30            | 8             | 0           | -3.310614               | 0.739900  | -0.421085 |
| 31            | 8             | 0           | -4.311283               | -0.297712 | 1.759714  |
| 32            | 1             | 0           | -1.209622               | 0.708671  | 0.949975  |
| 33            | 1             | 0           | -2.492980               | 1.310339  | -0.565141 |

ts4·H<sub>2</sub>PO<sub>4</sub><sup>-</sup>

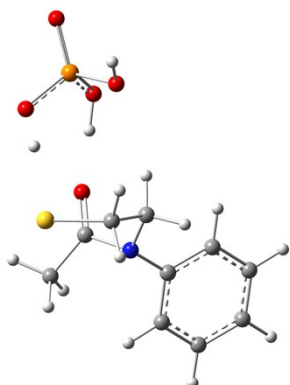

Level of theory: M06-2X/6-311+G(d,p) in PCM (water)//B3LYP/6-31+G(d), 1 atm, 298.15 K

Energy: -1560.68106238 hartree/particle

Thermal correction to Gibbs free energy: 0.200445 hartree/particle

Thermal correction to Enthalpy: 0.269604 hartree/particle

Number of imaginary frequencies: 1

IRC calc: OK

| Center Number | Atomic Number | Atomic Type | Coordinates (Angstroms) |           |           |
|---------------|---------------|-------------|-------------------------|-----------|-----------|
|               |               |             | X                       | Y         | Z         |
| 1             | 6             | 0           | -3.733385               | 0.573370  | -0.182358 |
| 2             | 6             | 0           | -4.969946               | -0.059304 | -0.315642 |
| 3             | 6             | 0           | -5.102723               | -1.427615 | -0.056012 |
| 4             | 6             | 0           | -3.973309               | -2.154493 | 0.330996  |
| 5             | 6             | 0           | -2.728799               | -1.530808 | 0.444955  |
| 6             | 6             | 0           | -2.585210               | -0.151341 | 0.193966  |
| 7             | 1             | 0           | -3.651062               | 1.643314  | -0.340857 |
| 8             | 1             | 0           | -5.840110               | 0.527704  | -0.603275 |
| 9             | 1             | 0           | -6.069587               | -1.916552 | -0.149934 |
| 10            | 1             | 0           | -4.053622               | -3.221438 | 0.529937  |
| 11            | 1             | 0           | -1.855681               | -2.116579 | 0.714570  |
| 12            | 7             | 0           | -1.333353               | 0.506017  | 0.332873  |
| 13            | 6             | 0           | -0.399216               | 0.019613  | 1.358887  |
| 14            | 1             | 0           | -0.988113               | -0.466717 | 2.145780  |
| 15            | 1             | 0           | 0.305661                | -0.720535 | 0.960117  |
| 16            | 6             | 0           | 0.359170                | 1.220853  | 1.942447  |
| 17            | 1             | 0           | 1.163236                | 0.844563  | 2.586845  |
| 18            | 1             | 0           | -0.330531               | 1.805537  | 2.564687  |
| 19            | 16            | 0           | 1.039598                | 2.307121  | 0.628172  |
| 20            | 6             | 0           | -0.682555               | 0.881119  | -0.915642 |
| 21            | 6             | 0           | -1.288865               | 2.034069  | -1.688209 |
| 22            | 1             | 0           | -2.114072               | 1.657955  | -2.311772 |
| 23            | 1             | 0           | -1.655218               | 2.817555  | -1.023587 |
| 24            | 1             | 0           | -0.524292               | 2.443205  | -2.351712 |
| 25            | 8             | 0           | 0.081828                | 0.092892  | -1.488307 |
| 26            | 1             | 0           | 1.448235                | -0.872446 | -1.182997 |
| 27            | 8             | 0           | 2.237640                | -1.467671 | -1.068526 |
| 28            | 15            | 0           | 3.481068                | -0.858054 | -0.272271 |
| 29            | 8             | 0           | 3.440964                | 0.722947  | -0.401423 |
| 30            | 8             | 0           | 3.048300                | -1.193957 | 1.286719  |
| 31            | 8             | 0           | 4.793908                | -1.464574 | -0.619595 |
| 32            | 1             | 0           | 2.611511                | 1.221609  | -0.026035 |
| 33            | 1             | 0           | 3.845450                | -1.182293 | 1.840161  |

## NBO analysis of $\text{ts4}\cdot\text{H}_2\text{PO}_4^-$ (excerpt)

### Second Order Perturbation Theory Analysis of Fock Matrix in NBO Basis

Threshold for printing: 0.50 kcal/mol  
 (Intermolecular threshold: 0.05 kcal/mol)

| Donor NBO (i)         | Acceptor NBO (j)          | E(2)<br>kcal/mol | E(j)-E(i)<br>a. u. | F(i, j)<br>a. u. |
|-----------------------|---------------------------|------------------|--------------------|------------------|
| =====                 |                           |                  |                    |                  |
| from unit 1 to unit 2 |                           |                  |                    |                  |
| 66. LP ( 1) 0 25      | /364. RY*( 1) H 26        | 0.11             | 2.76               | 0.016            |
| 66. LP ( 1) 0 25      | /368. RY*( 5) H 26        | 0.09             | 3.03               | 0.015            |
| 66. LP ( 1) 0 25      | /497. BD*( 1) H 26 - 0 27 | 12.47            | 1.24               | 0.111            |
| 67. LP ( 2) 0 25      | /497. BD*( 1) H 26 - 0 27 | 7.61             | 0.84               | 0.073            |
|                       |                           |                  |                    |                  |
| from unit 2 to unit 3 |                           |                  |                    |                  |
| 70. LP ( 1) 0 29      | / 78. LP*( 1) H 32        | 16.99            | 0.76               | 0.115            |
| 70. LP ( 1) 0 29      | /458. RY*( 1) H 32        | 1.17             | 2.18               | 0.046            |
| 70. LP ( 1) 0 29      | /459. RY*( 2) H 32        | 0.19             | 2.34               | 0.019            |
| 70. LP ( 1) 0 29      | /460. RY*( 3) H 32        | 0.14             | 2.30               | 0.016            |
| 70. LP ( 1) 0 29      | /461. RY*( 4) H 32        | 0.32             | 2.66               | 0.026            |
| 71. LP ( 2) 0 29      | /459. RY*( 2) H 32        | 0.13             | 2.08               | 0.015            |
| 71. LP ( 2) 0 29      | /460. RY*( 3) H 32        | 0.73             | 2.04               | 0.035            |
| 72. LP ( 3) 0 29      | / 78. LP*( 1) H 32        | 371.39           | 0.72               | 0.478            |
| 72. LP ( 3) 0 29      | /458. RY*( 1) H 32        | 14.13            | 2.15               | 0.171            |
| 72. LP ( 3) 0 29      | /459. RY*( 2) H 32        | 0.62             | 2.31               | 0.037            |
| 72. LP ( 3) 0 29      | /461. RY*( 4) H 32        | 0.14             | 2.62               | 0.019            |
| 72. LP ( 3) 0 29      | /462. RY*( 5) H 32        | 0.23             | 2.82               | 0.025            |

int2·H<sub>2</sub>PO<sub>4</sub><sup>-</sup>\_1

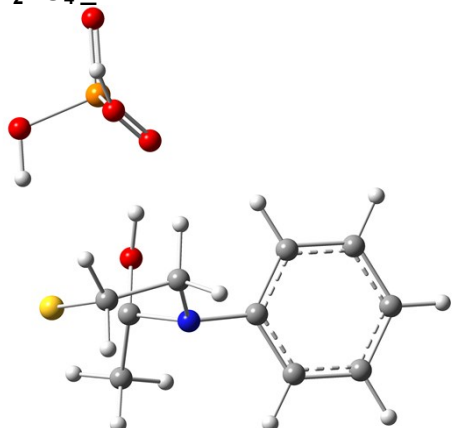

Level of theory: M06-2X/6-311+G(d,p) in PCM (water)//B3LYP/6-31+G(d), 1 atm, 298.15 K

Energy: -1560.70820859 hartree/particle

Thermal correction to Gibbs free energy: 0.205916 hartree/particle

Thermal correction to Enthalpy: 0.273503 hartree/particle

Number of imaginary frequencies: 0

| Center Number | Atomic Number | Atomic Type | Coordinates (Angstroms) |           |           |
|---------------|---------------|-------------|-------------------------|-----------|-----------|
|               |               |             | X                       | Y         | Z         |
| 1             | 6             | 0           | -3.620697               | 0.375484  | 0.178277  |
| 2             | 6             | 0           | -4.660137               | -0.527005 | -0.066704 |
| 3             | 6             | 0           | -4.377675               | -1.882575 | -0.258645 |
| 4             | 6             | 0           | -3.050549               | -2.322778 | -0.211238 |
| 5             | 6             | 0           | -2.007768               | -1.422027 | 0.020470  |
| 6             | 6             | 0           | -2.288359               | -0.059450 | 0.222663  |
| 7             | 1             | 0           | -3.827339               | 1.428839  | 0.348219  |
| 8             | 1             | 0           | -5.688590               | -0.172016 | -0.097789 |
| 9             | 1             | 0           | -5.183771               | -2.589686 | -0.444067 |
| 10            | 1             | 0           | -2.819410               | -3.373920 | -0.370241 |
| 11            | 1             | 0           | -0.976928               | -1.767144 | 0.027021  |
| 12            | 7             | 0           | -1.258802               | 0.906531  | 0.496986  |
| 13            | 6             | 0           | -0.328167               | 0.527139  | 1.577258  |
| 14            | 1             | 0           | -0.915707               | 0.322408  | 2.480438  |
| 15            | 1             | 0           | 0.272962                | -0.356647 | 1.334681  |
| 16            | 6             | 0           | 0.584615                | 1.732591  | 1.784213  |
| 17            | 1             | 0           | 1.523432                | 1.437477  | 2.260108  |
| 18            | 1             | 0           | 0.094575                | 2.516037  | 2.371958  |
| 19            | 16            | 0           | 0.927427                | 2.358752  | 0.090548  |
| 20            | 6             | 0           | -0.537497               | 1.417566  | -0.696444 |
| 21            | 6             | 0           | -1.398248               | 2.399310  | -1.491613 |
| 22            | 1             | 0           | -2.241409               | 1.861371  | -1.940151 |
| 23            | 1             | 0           | -1.772777               | 3.196963  | -0.845358 |
| 24            | 1             | 0           | -0.805141               | 2.834174  | -2.302365 |
| 25            | 8             | 0           | -0.092899               | 0.464796  | -1.595654 |
| 26            | 1             | 0           | 0.494499                | -0.227712 | -1.160729 |
| 27            | 8             | 0           | 1.361027                | -1.414475 | -0.412412 |
| 28            | 15            | 0           | 2.830057                | -1.419006 | -0.007093 |
| 29            | 8             | 0           | 3.502192                | -0.001355 | -0.524531 |
| 30            | 8             | 0           | 2.797318                | -1.204983 | 1.658746  |
| 31            | 8             | 0           | 3.782846                | -2.533855 | -0.316662 |
| 32            | 1             | 0           | 2.840875                | 0.718388  | -0.480189 |
| 33            | 1             | 0           | 3.627717                | -1.568119 | 2.004679  |



int2·H<sub>2</sub>PO<sub>4</sub><sup>-</sup>\_2

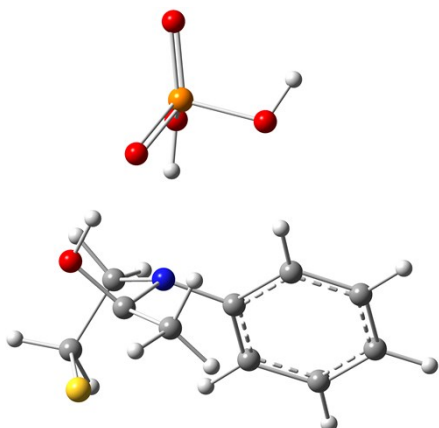

Level of theory: M06-2X/6-311+G(d,p) in PCM (water)//B3LYP/6-31+G(d), 1 atm, 298.15 K

Energy: -1560.70964343 hartree/particle

Thermal correction to Gibbs free energy: 0.207096 hartree/particle

Thermal correction to Enthalpy: 0.273505 hartree/particle

Number of imaginary frequencies: 0

| Center Number | Atomic Number | Atomic Type | Coordinates (Angstroms) |           |           |
|---------------|---------------|-------------|-------------------------|-----------|-----------|
|               |               |             | X                       | Y         | Z         |
| 1             | 6             | 0           | 0.846731                | 1.823402  | 0.348566  |
| 2             | 6             | 0           | 1.585073                | 2.987513  | 0.568892  |
| 3             | 6             | 0           | 2.939717                | 3.050780  | 0.226364  |
| 4             | 6             | 0           | 3.553354                | 1.928308  | -0.334844 |
| 5             | 6             | 0           | 2.824238                | 0.753214  | -0.539774 |
| 6             | 6             | 0           | 1.462347                | 0.686374  | -0.202146 |
| 7             | 1             | 0           | -0.213605               | 1.804081  | 0.585295  |
| 8             | 1             | 0           | 1.087199                | 3.856169  | 0.993886  |
| 9             | 1             | 0           | 3.507665                | 3.964279  | 0.389062  |
| 10            | 1             | 0           | 4.607096                | 1.957818  | -0.605194 |
| 11            | 1             | 0           | 3.325078                | -0.116180 | -0.951238 |
| 12            | 6             | 0           | 0.969129                | -1.286648 | -1.618819 |
| 13            | 1             | 0           | 0.037203                | -1.748682 | -1.952198 |
| 14            | 1             | 0           | 1.330815                | -0.626839 | -2.411910 |
| 15            | 6             | 0           | 1.987761                | -2.418328 | -1.282129 |
| 16            | 1             | 0           | 3.006921                | -2.168747 | -1.597943 |
| 17            | 1             | 0           | 1.695446                | -3.349053 | -1.777464 |
| 18            | 16            | 0           | 1.953282                | -2.619478 | 0.541216  |
| 19            | 6             | 0           | 0.463660                | -1.439166 | 0.698317  |
| 20            | 6             | 0           | 0.459851                | -0.809266 | 2.088559  |
| 21            | 1             | 0           | 1.367977                | -0.237926 | 2.294279  |
| 22            | 1             | 0           | -0.420885               | -0.168057 | 2.192847  |
| 23            | 1             | 0           | 0.372853                | -1.619368 | 2.819220  |
| 24            | 8             | 0           | -0.668670               | -2.203223 | 0.467373  |
| 25            | 1             | 0           | -1.192844               | 0.198604  | -1.065543 |
| 26            | 7             | 0           | 0.655967                | -0.483142 | -0.426569 |
| 27            | 8             | 0           | -4.481019               | 0.825361  | -0.532571 |
| 28            | 8             | 0           | -2.687850               | -0.563617 | 0.882921  |
| 29            | 15            | 0           | -3.085354               | 0.574840  | -0.045464 |
| 30            | 8             | 0           | -2.555715               | 1.961180  | 0.748610  |
| 31            | 8             | 0           | -2.072084               | 0.528881  | -1.351636 |
| 32            | 1             | 0           | -1.486729               | -1.620954 | 0.617118  |
| 33            | 1             | 0           | -3.089957               | 2.698044  | 0.412318  |

ts5-H<sub>2</sub>PO<sub>4</sub><sup>-</sup>

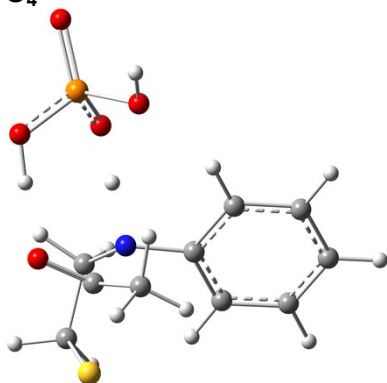

Level of theory: M06-2X/6-311+G(d,p) in PCM (water)//B3LYP/6-31+G(d), 1 atm, 298.15 K

Energy: -1560.6893665 hartree/particle

Thermal correction to Gibbs free energy: 0.201561 hartree/particle

Thermal correction to Enthalpy: 0.267582 hartree/particle

Number of imaginary frequencies: 1

IRC calc: OK

| Center Number | Atomic Number | Atomic Type | Coordinates (Angstroms) |           |           |
|---------------|---------------|-------------|-------------------------|-----------|-----------|
|               |               |             | X                       | Y         | Z         |
| 1             | 6             | 0           | 0.837861                | 1.950305  | 0.225174  |
| 2             | 6             | 0           | 1.638965                | 3.073963  | 0.433574  |
| 3             | 6             | 0           | 3.005855                | 3.037969  | 0.140565  |
| 4             | 6             | 0           | 3.563436                | 1.859570  | -0.362047 |
| 5             | 6             | 0           | 2.768787                | 0.727776  | -0.564006 |
| 6             | 6             | 0           | 1.396450                | 0.760713  | -0.272378 |
| 7             | 1             | 0           | -0.225669               | 1.992698  | 0.436882  |
| 8             | 1             | 0           | 1.185226                | 3.985325  | 0.816751  |
| 9             | 1             | 0           | 3.627092                | 3.917022  | 0.298319  |
| 10            | 1             | 0           | 4.626002                | 1.812011  | -0.591800 |
| 11            | 1             | 0           | 3.226347                | -0.183511 | -0.929234 |
| 12            | 6             | 0           | 0.834407                | -1.256269 | -1.612859 |
| 13            | 1             | 0           | -0.116731               | -1.692309 | -1.922063 |
| 14            | 1             | 0           | 1.216666                | -0.646645 | -2.436965 |
| 15            | 6             | 0           | 1.819741                | -2.393589 | -1.221474 |
| 16            | 1             | 0           | 2.815091                | -2.229959 | -1.650855 |
| 17            | 1             | 0           | 1.445774                | -3.348423 | -1.604180 |
| 18            | 16            | 0           | 1.962028                | -2.440787 | 0.605340  |
| 19            | 6             | 0           | 0.266931                | -1.389313 | 0.786612  |
| 20            | 6             | 0           | 0.337648                | -0.648067 | 2.123827  |
| 21            | 1             | 0           | 1.272300                | -0.099973 | 2.267773  |
| 22            | 1             | 0           | -0.511845               | 0.039319  | 2.204680  |
| 23            | 1             | 0           | 0.240338                | -1.403182 | 2.910774  |
| 24            | 8             | 0           | -0.774147               | -2.089216 | 0.550738  |
| 25            | 1             | 0           | -0.690835               | 0.095875  | -0.753006 |
| 26            | 7             | 0           | 0.516705                | -0.366627 | -0.468141 |
| 27            | 8             | 0           | -4.306060               | 0.977141  | -0.868951 |
| 28            | 8             | 0           | -3.188308               | -1.035962 | 0.272651  |
| 29            | 15            | 0           | -3.030315               | 0.460989  | -0.291132 |
| 30            | 8             | 0           | -2.603874               | 1.362405  | 1.050573  |
| 31            | 8             | 0           | -1.724949               | 0.533304  | -1.142154 |
| 32            | 1             | 0           | -2.291384               | -1.475611 | 0.430997  |
| 33            | 1             | 0           | -3.414826               | 1.621770  | 1.515664  |

## NBO analysis of $\text{ts5}\cdot\text{H}_2\text{PO}_4^-$ (excerpt)

### Second Order Perturbation Theory Analysis of Fock Matrix in NBO Basis

Threshold for printing: 0.50 kcal/mol  
 (Intermolecular threshold: 0.05 kcal/mol)

| Donor NBO (i)         | Acceptor NBO (j)   | E(2)<br>kcal/mol | E(j)-E(i)<br>a. u. | F(i, j)<br>a. u. |
|-----------------------|--------------------|------------------|--------------------|------------------|
| =====                 |                    |                  |                    |                  |
| from unit 1 to unit 2 |                    |                  |                    |                  |
| 68. LP ( 1) N 26      | / 67. LP*( 1) H 25 | 194.25           | 0.49               | 0.291            |
| 68. LP ( 1) N 26      | /347. RY*( 1) H 25 | 0.38             | 1.98               | 0.027            |
| 68. LP ( 1) N 26      | /348. RY*( 2) H 25 | 0.31             | 2.88               | 0.029            |
| 68. LP ( 1) N 26      | /349. RY*( 3) H 25 | 0.86             | 2.58               | 0.045            |
| within unit 3         |                    |                  |                    |                  |
| 72. LP ( 1) O 28      | /458. RY*( 1) H 32 | 1.99             | 2.63               | 0.065            |
| 73. LP ( 2) O 28      | /460. RY*( 3) H 32 | 1.06             | 2.05               | 0.042            |

**3·H<sub>2</sub>PO<sub>4</sub><sup>-</sup>\_1**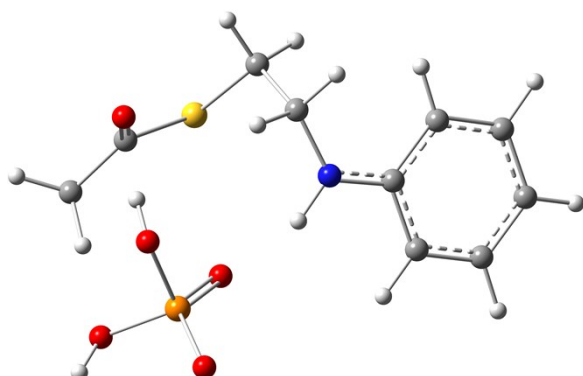

Level of theory: M06-2X/6-311+G(d,p) in PCM (water)//B3LYP/6-31+G(d), 1 atm, 298.15 K

Energy: -1560.71092327 hartree/particle

Thermal correction to Gibbs free energy: 0.199749 hartree/particle

Thermal correction to Enthalpy: 0.272959 hartree/particle

Number of imaginary frequencies: 0

| Center Number | Atomic Number | Atomic Type | Coordinates (Angstroms) |           |           |
|---------------|---------------|-------------|-------------------------|-----------|-----------|
|               |               |             | X                       | Y         | Z         |
| 1             | 6             | 0           | 2.813170                | 1.507703  | 0.620753  |
| 2             | 6             | 0           | 4.113348                | 1.852104  | 0.966898  |
| 3             | 6             | 0           | 5.213802                | 1.131975  | 0.473902  |
| 4             | 6             | 0           | 4.969296                | 0.052427  | -0.378119 |
| 5             | 6             | 0           | 3.667969                | -0.311155 | -0.735093 |
| 6             | 6             | 0           | 2.552841                | 0.414117  | -0.247380 |
| 7             | 1             | 0           | 1.969169                | 2.075181  | 1.005327  |
| 8             | 1             | 0           | 4.273542                | 2.698315  | 1.632980  |
| 9             | 1             | 0           | 6.228940                | 1.406429  | 0.750041  |
| 10            | 1             | 0           | 5.802701                | -0.525863 | -0.774846 |
| 11            | 1             | 0           | 3.519061                | -1.157617 | -1.399349 |
| 12            | 6             | 0           | 0.830866                | -0.980937 | -1.399502 |
| 13            | 1             | 0           | -0.183069               | -0.753218 | -1.732267 |
| 14            | 1             | 0           | 1.455922                | -1.069434 | -2.303110 |
| 15            | 6             | 0           | 0.823953                | -2.368429 | -0.714492 |
| 16            | 1             | 0           | 1.841638                | -2.710729 | -0.499102 |
| 17            | 1             | 0           | 0.343986                | -3.100961 | -1.372803 |
| 18            | 16            | 0           | -0.004346               | -2.414775 | 0.921362  |
| 19            | 6             | 0           | -1.710936               | -2.111881 | 0.478122  |
| 20            | 6             | 0           | -2.620645               | -1.897449 | 1.663674  |
| 21            | 1             | 0           | -2.171189               | -2.243104 | 2.599700  |
| 22            | 1             | 0           | -2.822545               | -0.820746 | 1.738808  |
| 23            | 1             | 0           | -3.569931               | -2.413355 | 1.484569  |
| 24            | 8             | 0           | -2.098219               | -2.070559 | -0.679405 |
| 25            | 1             | 0           | 0.487158                | 0.660196  | -0.165520 |
| 26            | 7             | 0           | 1.259722                | 0.124000  | -0.585059 |
| 27            | 8             | 0           | -2.691156               | 3.141056  | -0.496042 |
| 28            | 8             | 0           | -3.068614               | 0.774966  | -1.373078 |
| 29            | 15            | 0           | -2.495882               | 1.701733  | -0.120779 |
| 30            | 8             | 0           | -3.587895               | 1.322970  | 1.103016  |
| 31            | 8             | 0           | -1.189869               | 1.094177  | 0.353590  |
| 32            | 1             | 0           | -2.837749               | -0.161488 | -1.227138 |
| 33            | 1             | 0           | -4.336929               | 1.933361  | 1.016390  |

**2·H<sub>2</sub>PO<sub>4</sub><sup>-</sup>\_2**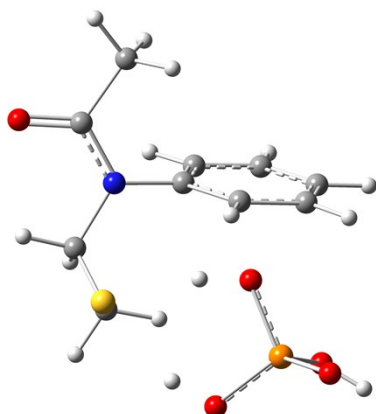

Level of theory: M06-2X/6-311+G(d,p) in PCM (water)//B3LYP/6-31+G(d), 1 atm, 298.15 K

Energy: -1560.70723745 hartree/particle

Thermal correction to Gibbs free energy: 0.195432 hartree/particle

Thermal correction to Enthalpy: 0.270808 hartree/particle

Number of imaginary frequencies: 0

| Center Number | Atomic Number | Atomic Type | Coordinates (Angstroms) |           |           |
|---------------|---------------|-------------|-------------------------|-----------|-----------|
|               |               |             | X                       | Y         | Z         |
| 1             | 6             | 0           | 1.651969                | 2.449558  | 1.249460  |
| 2             | 7             | 0           | 1.420173                | 1.638988  | 0.160832  |
| 3             | 16            | 0           | -1.920372               | 1.474156  | -0.503144 |
| 4             | 6             | 0           | 2.252439                | 1.783031  | 2.482890  |
| 5             | 6             | 0           | 0.785478                | 2.195118  | -1.049754 |
| 6             | 6             | 0           | -0.420661               | 1.404571  | -1.576108 |
| 7             | 8             | 0           | 1.391186                | 3.653253  | 1.254109  |
| 8             | 1             | 0           | -3.042150               | -0.094203 | -1.349495 |
| 9             | 6             | 0           | 1.988572                | 0.323204  | 0.065042  |
| 10            | 1             | 0           | -0.133276               | 0.365156  | -1.777624 |
| 11            | 1             | 0           | 1.551176                | 2.248918  | -1.842998 |
| 12            | 1             | 0           | 0.485943                | 3.212152  | -0.792802 |
| 13            | 1             | 0           | -0.669524               | 1.849492  | -2.548976 |
| 14            | 1             | 0           | 3.300263                | 1.507154  | 2.315463  |
| 15            | 1             | 0           | 2.201528                | 2.501824  | 3.303089  |
| 16            | 1             | 0           | 1.713387                | 0.870461  | 2.756492  |
| 17            | 6             | 0           | 3.325518                | 0.176958  | -0.334280 |
| 18            | 6             | 0           | 1.216984                | -0.814466 | 0.325069  |
| 19            | 6             | 0           | 1.781728                | -2.086455 | 0.193224  |
| 20            | 6             | 0           | 3.890392                | -1.094759 | -0.456573 |
| 21            | 6             | 0           | 3.117207                | -2.230722 | -0.192676 |
| 22            | 1             | 0           | 1.161960                | -2.959067 | 0.379943  |
| 23            | 1             | 0           | 3.914451                | 1.066690  | -0.546012 |
| 24            | 1             | 0           | 4.929349                | -1.198016 | -0.762822 |
| 25            | 1             | 0           | 3.552460                | -3.222389 | -0.295447 |
| 26            | 8             | 0           | -1.741492               | -2.886807 | -1.208008 |
| 27            | 15            | 0           | -2.978243               | -2.101670 | -0.444510 |
| 28            | 8             | 0           | -4.002984               | -3.095149 | -0.018693 |
| 29            | 8             | 0           | -2.223071               | -1.288831 | 0.699129  |
| 30            | 8             | 0           | -3.491455               | -1.002693 | -1.486693 |
| 31            | 1             | 0           | -2.053925               | -3.777194 | -1.433647 |
| 32            | 1             | 0           | 0.178646                | -0.705779 | 0.618486  |
| 33            | 1             | 0           | -2.031000               | -0.305165 | 0.424092  |

ts6·H<sub>2</sub>PO<sub>4</sub><sup>-</sup>

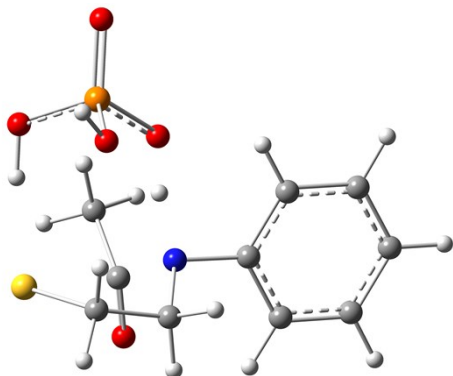

Level of theory: M06-2X/6-311+G(d,p) in PCM (water)//B3LYP/6-31+G(d), 1 atm, 298.15 K

Energy: -1560.68219737 hartree/particle

Thermal correction to Gibbs free energy: 0.199934 hartree/particle

Thermal correction to Enthalpy: 0.267555 hartree/particle

Number of imaginary frequencies: 1

IRC calc: OK

| Center Number | Atomic Number | Atomic Type | Coordinates (Angstroms) |           |           |
|---------------|---------------|-------------|-------------------------|-----------|-----------|
|               |               |             | X                       | Y         | Z         |
| 1             | 6             | 0           | 0.725011                | 1.583656  | 0.878960  |
| 2             | 7             | 0           | 0.717121                | 0.473311  | -0.218937 |
| 3             | 16            | 0           | -1.366297               | 2.442090  | -0.017505 |
| 4             | 6             | 0           | 0.267554                | 1.059949  | 2.228956  |
| 5             | 6             | 0           | 0.528791                | 1.129481  | -1.546622 |
| 6             | 6             | 0           | -0.889010               | 1.704659  | -1.634821 |
| 7             | 8             | 0           | 1.575863                | 2.467599  | 0.782918  |
| 8             | 1             | 0           | -2.642178               | 0.874556  | 0.557258  |
| 9             | 6             | 0           | 1.966275                | -0.291045 | -0.170901 |
| 10            | 1             | 0           | -1.598450               | 0.921275  | -1.916932 |
| 11            | 1             | 0           | 0.700714                | 0.373254  | -2.321411 |
| 12            | 1             | 0           | 1.275559                | 1.924566  | -1.655019 |
| 13            | 1             | 0           | -0.908437               | 2.472093  | -2.417991 |
| 14            | 1             | 0           | 1.109839                | 0.522951  | 2.690926  |
| 15            | 1             | 0           | 0.021996                | 1.914845  | 2.864138  |
| 16            | 1             | 0           | -0.590082               | 0.390115  | 2.164175  |
| 17            | 6             | 0           | 3.209527                | 0.319975  | -0.402105 |
| 18            | 6             | 0           | 1.918109                | -1.663292 | 0.110886  |
| 19            | 6             | 0           | 3.098600                | -2.412323 | 0.157277  |
| 20            | 6             | 0           | 4.383023                | -0.435536 | -0.353124 |
| 21            | 6             | 0           | 4.334733                | -1.805429 | -0.075478 |
| 22            | 1             | 0           | 3.043727                | -3.476486 | 0.376192  |
| 23            | 1             | 0           | 3.251777                | 1.386385  | -0.587726 |
| 24            | 1             | 0           | 5.339686                | 0.052543  | -0.528220 |
| 25            | 1             | 0           | 5.250928                | -2.391268 | -0.039566 |
| 26            | 8             | 0           | -2.978298               | -1.103160 | -1.495720 |
| 27            | 15            | 0           | -2.640121               | -1.299178 | 0.117006  |
| 28            | 8             | 0           | -3.324706               | -2.507485 | 0.659416  |
| 29            | 8             | 0           | -1.074404               | -1.288477 | 0.126052  |
| 30            | 8             | 0           | -3.170040               | 0.047190  | 0.815739  |
| 31            | 1             | 0           | -3.896950               | -1.375005 | -1.651055 |
| 32            | 1             | 0           | 0.958674                | -2.138362 | 0.285216  |
| 33            | 1             | 0           | -0.357080               | -0.416325 | -0.027836 |

## NBO analysis of $\text{ts6}\cdot\text{H}_2\text{PO}_4^-$ (excerpt)

### Second Order Perturbation Theory Analysis of Fock Matrix in NBO Basis

Threshold for printing: 0.50 kcal/mol  
 (Intermolecular threshold: 0.05 kcal/mol)

| Donor NBO (i)         | Acceptor NBO (j)   | E(2)<br>kcal/mol | E(j)-E(i)<br>a. u. | F(i, j)<br>a. u. |
|-----------------------|--------------------|------------------|--------------------|------------------|
| =====                 |                    |                  |                    |                  |
| from unit 1 to unit 4 |                    |                  |                    |                  |
| 61. LP ( 1) N 2       | / 79. LP*( 1) H 33 | 144.35           | 0.51               | 0.258            |
| 61. LP ( 1) N 2       | /465. RY*( 2) H 33 | 0.65             | 3.02               | 0.042            |
| 61. LP ( 1) N 2       | /466. RY*( 3) H 33 | 0.65             | 2.61               | 0.039            |
|                       |                    |                  |                    |                  |
| from unit 3 to unit 2 |                    |                  |                    |                  |
| 76. LP ( 1) O 30      | / 67. LP*( 1) H 8  | 16.74            | 0.80               | 0.117            |
| 76. LP ( 1) O 30      | /203. RY*( 1) H 8  | 1.25             | 2.23               | 0.047            |
| 76. LP ( 1) O 30      | /205. RY*( 3) H 8  | 0.20             | 2.33               | 0.019            |
| 76. LP ( 1) O 30      | /206. RY*( 4) H 8  | 0.43             | 2.68               | 0.030            |
| 77. LP ( 2) O 30      | /204. RY*( 2) H 8  | 0.35             | 1.96               | 0.024            |
| 77. LP ( 2) O 30      | /205. RY*( 3) H 8  | 0.71             | 2.05               | 0.035            |
| 77. LP ( 2) O 30      | /206. RY*( 4) H 8  | 0.07             | 2.40               | 0.012            |
| 78. LP ( 3) O 30      | / 67. LP*( 1) H 8  | 426.87           | 0.73               | 0.512            |
| 78. LP ( 3) O 30      | /203. RY*( 1) H 8  | 16.54            | 2.16               | 0.188            |
| 78. LP ( 3) O 30      | /204. RY*( 2) H 8  | 0.84             | 2.18               | 0.042            |
| 78. LP ( 3) O 30      | /205. RY*( 3) H 8  | 0.06             | 2.26               | 0.011            |
| 78. LP ( 3) O 30      | /206. RY*( 4) H 8  | 0.09             | 2.62               | 0.016            |
| 78. LP ( 3) O 30      | /207. RY*( 5) H 8  | 0.18             | 2.87               | 0.023            |

3·H<sub>2</sub>PO<sub>4</sub><sup>-</sup>\_2

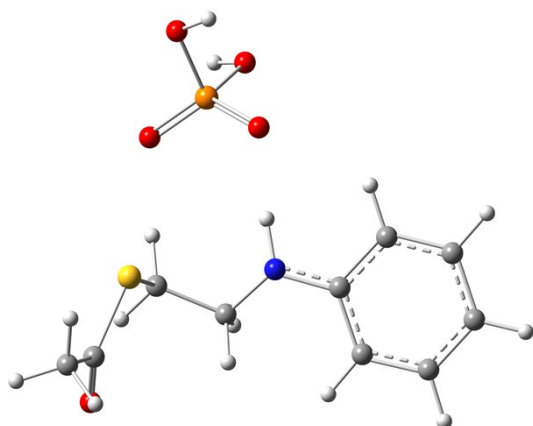

Level of theory: M06-2X/6-311+G(d,p) in PCM (water)//B3LYP/6-31+G(d), 1 atm, 298.15 K

Energy: -1560.70386264 hartree/particle

Thermal correction to Gibbs free energy: 0.193763 hartree/particle

Thermal correction to Enthalpy: 0.272677 hartree/particle

Number of imaginary frequencies: 0

| Center Number | Atomic Number | Atomic Type | Coordinates (Angstroms) |           |           |
|---------------|---------------|-------------|-------------------------|-----------|-----------|
|               |               |             | X                       | Y         | Z         |
| 1             | 6             | 0           | -1.830451               | -2.544412 | 0.318035  |
| 2             | 6             | 0           | -2.893245               | -3.438433 | 0.332752  |
| 3             | 6             | 0           | -4.114977               | -3.128666 | -0.287881 |
| 4             | 6             | 0           | -4.235000               | -1.897474 | -0.935309 |
| 5             | 6             | 0           | -3.175256               | -0.985302 | -0.964611 |
| 6             | 6             | 0           | -1.949484               | -1.282485 | -0.322398 |
| 7             | 1             | 0           | -0.881762               | -2.795249 | 0.785747  |
| 8             | 1             | 0           | -2.766876               | -4.398040 | 0.831772  |
| 9             | 1             | 0           | -4.942433               | -3.834260 | -0.273387 |
| 10            | 1             | 0           | -5.165975               | -1.635553 | -1.436525 |
| 11            | 1             | 0           | -3.303575               | -0.044214 | -1.490106 |
| 12            | 6             | 0           | -0.816137               | 0.783257  | -1.086274 |
| 13            | 1             | 0           | -0.697010               | 0.539252  | -2.160352 |
| 14            | 1             | 0           | -1.747758               | 1.354352  | -0.994207 |
| 15            | 6             | 0           | 0.360165                | 1.678931  | -0.695561 |
| 16            | 1             | 0           | 0.429876                | 2.517775  | -1.393727 |
| 17            | 1             | 0           | 1.312616                | 1.133542  | -0.698999 |
| 18            | 16            | 0           | 0.203288                | 2.409110  | 0.982593  |
| 19            | 6             | 0           | -0.692789               | 3.905738  | 0.639362  |
| 20            | 6             | 0           | -0.992600               | 4.733402  | 1.881398  |
| 21            | 1             | 0           | -2.079843               | 4.781370  | 2.014446  |
| 22            | 1             | 0           | -0.538706               | 4.319338  | 2.786217  |
| 23            | 1             | 0           | -0.627967               | 5.754152  | 1.720605  |
| 24            | 8             | 0           | -1.052029               | 4.266262  | -0.470786 |
| 25            | 1             | 0           | 0.011830                | -0.827116 | 0.011318  |
| 26            | 7             | 0           | -0.887295               | -0.410142 | -0.271944 |
| 27            | 1             | 0           | 3.556364                | -1.863963 | 1.984140  |
| 28            | 8             | 0           | 3.972784                | -1.347450 | 1.275992  |
| 29            | 15            | 0           | 2.907952                | -1.320402 | -0.003588 |
| 30            | 8             | 0           | 3.438839                | -2.604678 | -0.921604 |
| 31            | 8             | 0           | 1.550417                | -1.697884 | 0.553087  |
| 32            | 8             | 0           | 3.151662                | -0.059571 | -0.792645 |
| 33            | 1             | 0           | 4.043357                | -2.245607 | -1.590199 |



**with  $\text{HSO}_4^-$**

$\text{HSO}_4^-$

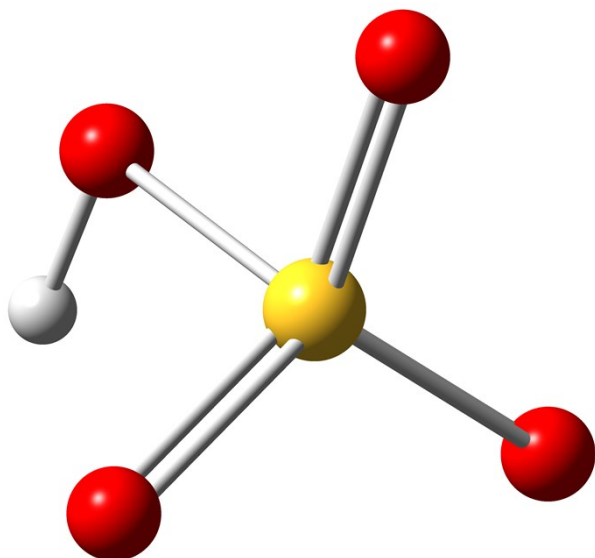

Level of theory: M06-2X/6-311+G(d,p) in PCM (water)//B3LYP/6-31+G(d), 1 atm, 298.15 K

Energy: -699.78649264 hartree/particle

Thermal correction to Gibbs free energy: -0.002572 hartree/particle

Thermal correction to Enthalpy: 0.031963 hartree/particle

Number of imaginary frequencies: 0

| Center Number | Atomic Number | Atomic Type | Coordinates (Angstroms) |           |           |
|---------------|---------------|-------------|-------------------------|-----------|-----------|
|               |               |             | X                       | Y         | Z         |
| 1             | 16            | 0           | 0.155065                | -0.024712 | 0.000020  |
| 2             | 8             | 0           | -1.484034               | 0.475161  | -0.000234 |
| 3             | 1             | 0           | -1.993366               | -0.353697 | -0.000181 |
| 4             | 8             | 0           | 0.282453                | -0.827961 | 1.244512  |
| 5             | 8             | 0           | 0.282964                | -0.827672 | -1.244602 |
| 6             | 8             | 0           | 0.857659                | 1.274108  | 0.000306  |

2·HSO<sub>4</sub><sup>-</sup>\_1

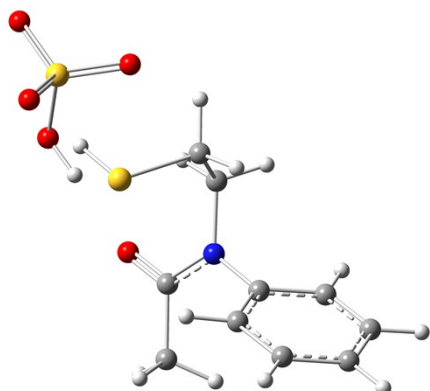

Level of theory: M06-2X/6-311+G(d,p) in PCM (water)//B3LYP/6-31+G(d), 1 atm, 298.15 K

Energy: -1616.79522463 hartree/particle

Thermal correction to Gibbs free energy: 0.188643 hartree/particle

Thermal correction to Enthalpy: 0.260082 hartree/particle

Number of imaginary frequencies: 0

| Center Number | Atomic Number | Atomic Type | Coordinates (Angstroms) |           |           |
|---------------|---------------|-------------|-------------------------|-----------|-----------|
|               |               |             | X                       | Y         | Z         |
| 1             | 6             | 0           | -3.229512               | 0.971635  | 0.177046  |
| 2             | 6             | 0           | -4.591625               | 1.004595  | 0.488626  |
| 3             | 6             | 0           | -5.322809               | -0.183017 | 0.586961  |
| 4             | 6             | 0           | -4.684170               | -1.408778 | 0.372076  |
| 5             | 6             | 0           | -3.325045               | -1.444266 | 0.051514  |
| 6             | 6             | 0           | -2.592519               | -0.253857 | -0.056693 |
| 7             | 1             | 0           | -2.641857               | 1.883628  | 0.128407  |
| 8             | 1             | 0           | -5.077863               | 1.960725  | 0.667755  |
| 9             | 1             | 0           | -6.381217               | -0.154794 | 0.835263  |
| 10            | 1             | 0           | -5.244489               | -2.337766 | 0.449274  |
| 11            | 1             | 0           | -2.822807               | -2.391965 | -0.125229 |
| 12            | 7             | 0           | -1.194003               | -0.308046 | -0.362979 |
| 13            | 6             | 0           | -0.280664               | -0.704317 | 0.725296  |
| 14            | 1             | 0           | -0.578679               | -1.702629 | 1.078903  |
| 15            | 1             | 0           | 0.725626                | -0.788559 | 0.316725  |
| 16            | 6             | 0           | -0.270439               | 0.248943  | 1.927107  |
| 17            | 1             | 0           | 0.486134                | -0.122235 | 2.624692  |
| 18            | 1             | 0           | -1.238002               | 0.246259  | 2.442305  |
| 19            | 16            | 0           | 0.086136                | 2.014082  | 1.549927  |
| 20            | 6             | 0           | -0.689722               | 0.056839  | -1.589463 |
| 21            | 6             | 0           | -1.684149               | 0.489573  | -2.659616 |
| 22            | 1             | 0           | -2.599564               | -0.109659 | -2.665879 |
| 23            | 1             | 0           | -1.971054               | 1.536073  | -2.503061 |
| 24            | 1             | 0           | -1.179974               | 0.412041  | -3.624934 |
| 25            | 8             | 0           | 0.513434                | 0.032368  | -1.849356 |
| 26            | 1             | 0           | 2.423580                | 0.078413  | -1.426851 |
| 27            | 8             | 0           | 3.395451                | 0.056962  | -1.293627 |
| 28            | 8             | 0           | 3.170280                | 1.584451  | 0.695731  |
| 29            | 8             | 0           | 2.885351                | -0.860911 | 0.988602  |
| 30            | 8             | 0           | 5.148365                | 0.076861  | 0.430557  |
| 31            | 1             | 0           | 1.397921                | 1.840925  | 1.168051  |
| 32            | 16            | 0           | 3.685328                | 0.220465  | 0.344024  |

ts4·HSO<sub>4</sub><sup>-</sup>

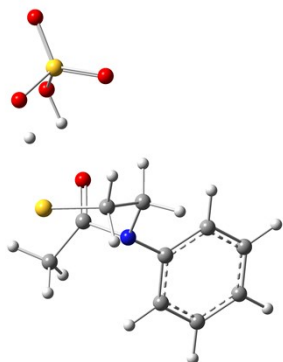

Level of theory: M06-2X/6-311+G(d,p) in PCM (water)//B3LYP/6-31+G(d), 1 atm, 298.15 K

Energy: -1616.74194673 hartree/particle

Thermal correction to Gibbs free energy: 0.191865 hartree/particle

Thermal correction to Enthalpy: 0.258159 hartree/particle

Number of imaginary frequencies: 1

IRC calc: OK

| Center Number | Atomic Number | Atomic Type | Coordinates (Angstroms) |           |           |
|---------------|---------------|-------------|-------------------------|-----------|-----------|
|               |               |             | X                       | Y         | Z         |
| 1             | 6             | 0           | -3.695078               | 0.590090  | -0.361972 |
| 2             | 6             | 0           | -4.920956               | -0.053964 | -0.530836 |
| 3             | 6             | 0           | -5.096141               | -1.375146 | -0.104281 |
| 4             | 6             | 0           | -4.019434               | -2.042884 | 0.485535  |
| 5             | 6             | 0           | -2.783158               | -1.409932 | 0.636797  |
| 6             | 6             | 0           | -2.598780               | -0.076594 | 0.220717  |
| 7             | 1             | 0           | -3.581544               | 1.628895  | -0.654560 |
| 8             | 1             | 0           | -5.750948               | 0.488335  | -0.979855 |
| 9             | 1             | 0           | -6.055668               | -1.872524 | -0.225868 |
| 10            | 1             | 0           | -4.132874               | -3.073538 | 0.816352  |
| 11            | 1             | 0           | -1.948940               | -1.955935 | 1.064810  |
| 12            | 7             | 0           | -1.364127               | 0.608306  | 0.391940  |
| 13            | 6             | 0           | -0.506699               | 0.185161  | 1.511131  |
| 14            | 1             | 0           | -1.157145               | -0.126927 | 2.337124  |
| 15            | 1             | 0           | 0.142035                | -0.657596 | 1.239574  |
| 16            | 6             | 0           | 0.344216                | 1.387093  | 1.938715  |
| 17            | 1             | 0           | 1.133218                | 1.049318  | 2.620540  |
| 18            | 1             | 0           | -0.286014               | 2.110789  | 2.469520  |
| 19            | 16            | 0           | 1.075706                | 2.210064  | 0.469913  |
| 20            | 6             | 0           | -0.593918               | 0.772284  | -0.854446 |
| 21            | 6             | 0           | -1.075503               | 1.845833  | -1.811223 |
| 22            | 1             | 0           | -1.879504               | 1.427998  | -2.435454 |
| 23            | 1             | 0           | -1.437400               | 2.729854  | -1.283848 |
| 24            | 1             | 0           | -0.249724               | 2.122623  | -2.470501 |
| 25            | 8             | 0           | 0.059573                | -0.193360 | -1.289148 |
| 26            | 1             | 0           | 1.624488                | -0.732388 | -1.359402 |
| 27            | 8             | 0           | 2.573076                | -1.040791 | -1.481482 |
| 28            | 8             | 0           | 3.602778                | 0.648969  | 0.078537  |
| 29            | 8             | 0           | 2.595287                | -1.450350 | 0.990213  |
| 30            | 8             | 0           | 4.717186                | -1.490903 | -0.384801 |
| 31            | 1             | 0           | 2.684927                | 1.161140  | 0.242275  |
| 32            | 16            | 0           | 3.407637                | -0.914961 | -0.108142 |

NBO analysis of **ts4·HSO<sub>4</sub><sup>-</sup>** (excerpt)

Second Order Perturbation Theory Analysis of Fock Matrix in NBO Basis

Threshold for printing: 0.50 kcal/mol  
 (Intermolecular threshold: 0.05 kcal/mol)

| Donor NBO (i)         | Acceptor NBO (j)          | E(2)<br>kcal/mol | E(j)-E(i)<br>a. u. | F(i, j)<br>a. u. |
|-----------------------|---------------------------|------------------|--------------------|------------------|
| =====                 |                           |                  |                    |                  |
| from unit 1 to unit 2 |                           |                  |                    |                  |
| 65. LP ( 1) 0 25      | /364. RY*( 1) H 26        | 0.16             | 2.70               | 0.019            |
| 65. LP ( 1) 0 25      | /368. RY*( 5) H 26        | 0.18             | 2.88               | 0.021            |
| 65. LP ( 1) 0 25      | /492. BD*( 1) H 26 - 0 27 | 18.89            | 1.21               | 0.135            |
| 66. LP ( 2) 0 25      | /365. RY*( 2) H 26        | 0.07             | 2.05               | 0.011            |
|                       |                           |                  |                    |                  |
| from unit 2 to unit 3 |                           |                  |                    |                  |
| 69. LP ( 1) 0 28      | / 78. LP*( 1) H 31        | 19.68            | 0.80               | 0.128            |
| 69. LP ( 1) 0 28      | /437. RY*( 1) H 31        | 1.63             | 2.12               | 0.053            |
| 69. LP ( 1) 0 28      | /438. RY*( 2) H 31        | 0.19             | 2.47               | 0.020            |
| 69. LP ( 1) 0 28      | /441. RY*( 5) H 31        | 0.35             | 2.90               | 0.029            |
| 70. LP ( 2) 0 28      | / 78. LP*( 1) H 31        | 0.32             | 0.47               | 0.012            |
| 70. LP ( 2) 0 28      | /438. RY*( 2) H 31        | 0.08             | 2.14               | 0.012            |
| 70. LP ( 2) 0 28      | /439. RY*( 3) H 31        | 0.79             | 2.02               | 0.036            |
| 71. LP ( 3) 0 28      | / 78. LP*( 1) H 31        | 336.46           | 0.70               | 0.455            |
| 71. LP ( 3) 0 28      | /437. RY*( 1) H 31        | 11.21            | 2.02               | 0.147            |
| 71. LP ( 3) 0 28      | /438. RY*( 2) H 31        | 0.65             | 2.37               | 0.038            |
| 71. LP ( 3) 0 28      | /439. RY*( 3) H 31        | 0.07             | 2.25               | 0.012            |
| 71. LP ( 3) 0 28      | /440. RY*( 4) H 31        | 0.25             | 2.71               | 0.026            |
| 71. LP ( 3) 0 28      | /441. RY*( 5) H 31        | 0.10             | 2.80               | 0.016            |

int2·HSO<sub>4</sub><sup>-</sup>\_1

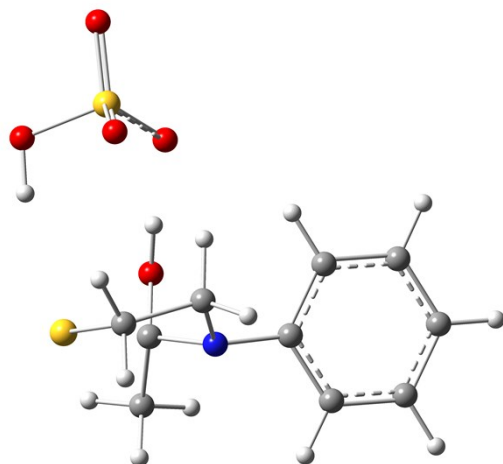

Level of theory: M06-2X/6-311+G(d,p) in PCM (water)//B3LYP/6-31+G(d), 1 atm, 298.15 K

Energy: -1616.78394230 hartree/particle

Thermal correction to Gibbs free energy: 0.196300 hartree/particle

Thermal correction to Enthalpy: 0.262569 hartree/particle

Number of imaginary frequencies: 0

| Center Number | Atomic Number | Atomic Type | Coordinates (Angstroms) |           |           |
|---------------|---------------|-------------|-------------------------|-----------|-----------|
|               |               |             | X                       | Y         | Z         |
| 1             | 6             | 0           | -3.584454               | 0.234928  | 0.312767  |
| 2             | 6             | 0           | -4.597947               | -0.706040 | 0.108604  |
| 3             | 6             | 0           | -4.274147               | -2.051846 | -0.086628 |
| 4             | 6             | 0           | -2.931385               | -2.443870 | -0.083176 |
| 5             | 6             | 0           | -1.915679               | -1.503602 | 0.106839  |
| 6             | 6             | 0           | -2.236055               | -0.150449 | 0.311291  |
| 7             | 1             | 0           | -3.823820               | 1.280367  | 0.487507  |
| 8             | 1             | 0           | -5.638931               | -0.388544 | 0.113138  |
| 9             | 1             | 0           | -5.060145               | -2.788486 | -0.239624 |
| 10            | 1             | 0           | -2.667902               | -3.487063 | -0.243565 |
| 11            | 1             | 0           | -0.875017               | -1.814379 | 0.082241  |
| 12            | 7             | 0           | -1.232794               | 0.852185  | 0.541785  |
| 13            | 6             | 0           | -0.229615               | 0.507009  | 1.568020  |
| 14            | 1             | 0           | -0.758394               | 0.269146  | 2.498566  |
| 15            | 1             | 0           | 0.400766                | -0.345613 | 1.292487  |
| 16            | 6             | 0           | 0.643783                | 1.745897  | 1.738956  |
| 17            | 1             | 0           | 1.622587                | 1.476123  | 2.142169  |
| 18            | 1             | 0           | 0.161324                | 2.502110  | 2.366703  |
| 19            | 16            | 0           | 0.852408                | 2.409620  | 0.036465  |
| 20            | 6             | 0           | -0.599858               | 1.409019  | -0.676298 |
| 21            | 6             | 0           | -1.545248               | 2.344687  | -1.428890 |
| 22            | 1             | 0           | -2.377806               | 1.764999  | -1.843395 |
| 23            | 1             | 0           | -1.931935               | 3.119291  | -0.762289 |
| 24            | 1             | 0           | -1.011684               | 2.813379  | -2.261716 |
| 25            | 8             | 0           | -0.155732               | 0.476908  | -1.609482 |
| 26            | 1             | 0           | 0.501428                | -0.160313 | -1.218602 |
| 27            | 8             | 0           | 1.559194                | -1.365400 | -0.558290 |
| 28            | 8             | 0           | 3.464633                | 0.236772  | -0.878699 |
| 29            | 8             | 0           | 2.947043                | -0.722819 | 1.391005  |
| 30            | 8             | 0           | 3.934617                | -2.140073 | -0.431789 |
| 31            | 1             | 0           | 2.821149                | 0.951601  | -0.678959 |
| 32            | 16            | 0           | 2.953437                | -1.119334 | -0.040093 |

int2·HSO<sub>4</sub><sup>-</sup>\_2

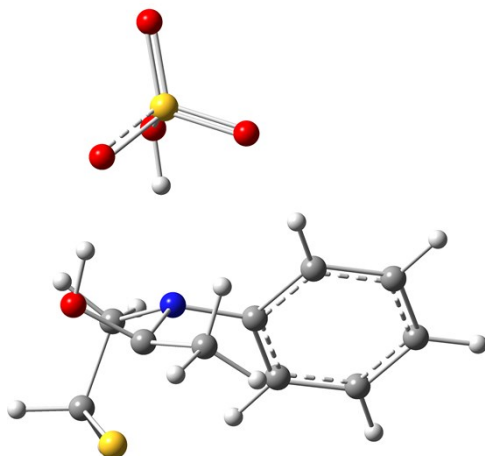

Level of theory: M06-2X/6-311+G(d,p) in PCM (water)//B3LYP/6-31+G(d), 1 atm, 298.15 K

Energy: -1616.78534265 hartree/particle

Thermal correction to Gibbs free energy: 0.197468 hartree/particle

Thermal correction to Enthalpy: 0.262504 hartree/particle

Number of imaginary frequencies: 0

| Center Number | Atomic Number | Atomic Type | Coordinates (Angstroms) |           |           |
|---------------|---------------|-------------|-------------------------|-----------|-----------|
|               |               |             | X                       | Y         | Z         |
| 1             | 6             | 0           | 0.658928                | 1.914565  | 0.277177  |
| 2             | 6             | 0           | 1.317026                | 3.127354  | 0.491782  |
| 3             | 6             | 0           | 2.673925                | 3.269392  | 0.184703  |
| 4             | 6             | 0           | 3.372735                | 2.177430  | -0.335389 |
| 5             | 6             | 0           | 2.724661                | 0.955255  | -0.536677 |
| 6             | 6             | 0           | 1.360783                | 0.810204  | -0.233849 |
| 7             | 1             | 0           | -0.403298               | 1.824849  | 0.495131  |
| 8             | 1             | 0           | 0.752920                | 3.970112  | 0.884618  |
| 9             | 1             | 0           | 3.178810                | 4.219973  | 0.343165  |
| 10            | 1             | 0           | 4.429808                | 2.267986  | -0.577642 |
| 11            | 1             | 0           | 3.292320                | 0.114613  | -0.919313 |
| 12            | 6             | 0           | 1.069298                | -1.228872 | -1.611289 |
| 13            | 1             | 0           | 0.192484                | -1.763497 | -1.982148 |
| 14            | 1             | 0           | 1.431154                | -0.566689 | -2.401889 |
| 15            | 6             | 0           | 2.143559                | -2.278227 | -1.182339 |
| 16            | 1             | 0           | 3.155434                | -1.986078 | -1.483517 |
| 17            | 1             | 0           | 1.921134                | -3.251010 | -1.630445 |
| 18            | 16            | 0           | 2.070193                | -2.381639 | 0.649367  |
| 19            | 6             | 0           | 0.471550                | -1.356926 | 0.679066  |
| 20            | 6             | 0           | 0.293711                | -0.692907 | 2.040259  |
| 21            | 1             | 0           | 1.141707                | -0.057584 | 2.306456  |
| 22            | 1             | 0           | -0.624587               | -0.096151 | 2.042666  |
| 23            | 1             | 0           | 0.191059                | -1.486057 | 2.787065  |
| 24            | 8             | 0           | -0.552908               | -2.255189 | 0.392840  |
| 25            | 1             | 0           | -1.203352               | 0.162246  | -1.134106 |
| 26            | 7             | 0           | 0.634511                | -0.416162 | -0.462385 |
| 27            | 8             | 0           | -4.425965               | 0.691197  | -0.640028 |
| 28            | 8             | 0           | -2.961968               | -1.032663 | 0.429482  |
| 29            | 8             | 0           | -2.511013               | 1.370630  | 0.834921  |
| 30            | 8             | 0           | -2.109953               | 0.397333  | -1.446270 |
| 31            | 1             | 0           | -1.439812               | -1.791082 | 0.440410  |
| 32            | 16            | 0           | -3.100189               | 0.368979  | -0.095741 |

ts5-HSO<sub>4</sub><sup>-</sup>

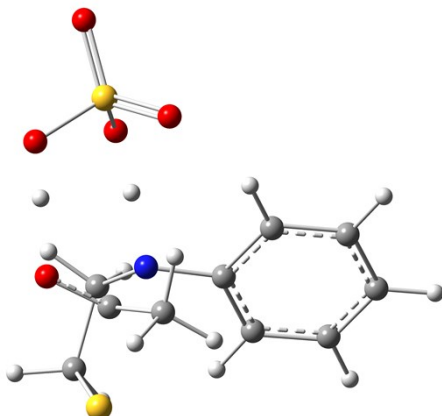

Level of theory: M06-2X/6-311+G(d,p) in PCM (water)//B3LYP/6-31+G(d), 1 atm, 298.15 K

Energy: -1616.75951280 hartree/particle

Thermal correction to Gibbs free energy: 0.192880 hartree/particle

Thermal correction to Enthalpy: 0.255853 hartree/particle

Number of imaginary frequencies: 1

IRC calc: OK

| Center Number | Atomic Number | Atomic Type | Coordinates (Angstroms) |           |           |
|---------------|---------------|-------------|-------------------------|-----------|-----------|
|               |               |             | X                       | Y         | Z         |
| 1             | 6             | 0           | 0.878054                | 1.919560  | 0.270298  |
| 2             | 6             | 0           | 1.714436                | 3.016766  | 0.481926  |
| 3             | 6             | 0           | 3.072675                | 2.950665  | 0.155807  |
| 4             | 6             | 0           | 3.587545                | 1.768271  | -0.381499 |
| 5             | 6             | 0           | 2.758020                | 0.662201  | -0.586220 |
| 6             | 6             | 0           | 1.393986                | 0.726586  | -0.263262 |
| 7             | 1             | 0           | -0.178005               | 1.982225  | 0.517759  |
| 8             | 1             | 0           | 1.294341                | 3.930914  | 0.895331  |
| 9             | 1             | 0           | 3.720709                | 3.809638  | 0.316210  |
| 10            | 1             | 0           | 4.643086                | 1.697158  | -0.636180 |
| 11            | 1             | 0           | 3.182898                | -0.252920 | -0.981222 |
| 12            | 6             | 0           | 0.778389                | -1.268720 | -1.612986 |
| 13            | 1             | 0           | -0.181754               | -1.674035 | -1.935938 |
| 14            | 1             | 0           | 1.192754                | -0.670809 | -2.429899 |
| 15            | 6             | 0           | 1.716448                | -2.440417 | -1.209565 |
| 16            | 1             | 0           | 2.728025                | -2.308406 | -1.610605 |
| 17            | 1             | 0           | 1.320278                | -3.380477 | -1.605988 |
| 18            | 16            | 0           | 1.804930                | -2.494023 | 0.619716  |
| 19            | 6             | 0           | 0.188057                | -1.367478 | 0.766486  |
| 20            | 6             | 0           | 0.258628                | -0.643565 | 2.113200  |
| 21            | 1             | 0           | 1.211098                | -0.134304 | 2.281689  |
| 22            | 1             | 0           | -0.565121               | 0.074395  | 2.186440  |
| 23            | 1             | 0           | 0.118122                | -1.403809 | 2.888564  |
| 24            | 8             | 0           | -0.893294               | -2.032612 | 0.518924  |
| 25            | 1             | 0           | -0.762750               | 0.136372  | -0.804689 |
| 26            | 7             | 0           | 0.478488                | -0.371844 | -0.468215 |
| 27            | 8             | 0           | -4.147974               | 1.070198  | -0.811651 |
| 28            | 8             | 0           | -3.157606               | -0.896814 | 0.295610  |
| 29            | 8             | 0           | -2.417413               | 1.392740  | 0.987823  |
| 30            | 8             | 0           | -1.769780               | 0.505553  | -1.234875 |
| 31            | 1             | 0           | -2.229819               | -1.367727 | 0.454686  |
| 32            | 16            | 0           | -2.919441               | 0.613333  | -0.164116 |

## NBO analysis of **ts5·HSO<sub>4</sub><sup>-</sup>** (excerpt)

### Second Order Perturbation Theory Analysis of Fock Matrix in NBO Basis

Threshold for printing: 0.50 kcal/mol  
 (Intermolecular threshold: 0.05 kcal/mol)

| Donor NBO (i)         | Acceptor NBO (j)   | E(2)<br>kcal/mol | E(j)-E(i)<br>a. u. | F(i, j)<br>a. u. |
|-----------------------|--------------------|------------------|--------------------|------------------|
| =====                 |                    |                  |                    |                  |
| from unit 1 to unit 2 |                    |                  |                    |                  |
| 66. LP ( 1) N 26      | / 65. LP*( 1) H 25 | 166.04           | 0.47               | 0.264            |
| 66. LP ( 1) N 26      | /349. RY*( 2) H 25 | 0.53             | 2.70               | 0.036            |
| 66. LP ( 1) N 26      | /350. RY*( 3) H 25 | 0.88             | 2.47               | 0.045            |
|                       |                    |                  |                    |                  |
| from unit 3 to unit 4 |                    |                  |                    |                  |
| 70. LP ( 1) O 28      | / 79. LP*( 1) H 31 | 19.92            | 0.89               | 0.134            |
| 70. LP ( 1) O 28      | /438. RY*( 1) H 31 | 2.15             | 2.78               | 0.069            |
| 70. LP ( 1) O 28      | /439. RY*( 2) H 31 | 0.42             | 2.84               | 0.031            |
| 70. LP ( 1) O 28      | /440. RY*( 3) H 31 | 0.31             | 2.54               | 0.025            |
| 70. LP ( 1) O 28      | /441. RY*( 4) H 31 | 0.17             | 2.73               | 0.020            |
| 71. LP ( 2) O 28      | /439. RY*( 2) H 31 | 0.06             | 2.49               | 0.012            |
| 71. LP ( 2) O 28      | /440. RY*( 3) H 31 | 0.57             | 2.19               | 0.032            |
| 71. LP ( 2) O 28      | /441. RY*( 4) H 31 | 0.18             | 2.38               | 0.019            |
| 72. LP ( 3) O 28      | / 79. LP*( 1) H 31 | 376.45           | 0.75               | 0.488            |
| 72. LP ( 3) O 28      | /438. RY*( 1) H 31 | 5.15             | 2.64               | 0.115            |
| 72. LP ( 3) O 28      | /439. RY*( 2) H 31 | 0.51             | 2.70               | 0.037            |
| 72. LP ( 3) O 28      | /440. RY*( 3) H 31 | 0.19             | 2.40               | 0.021            |
| 72. LP ( 3) O 28      | /441. RY*( 4) H 31 | 0.12             | 2.59               | 0.017            |



### 3·HSO<sub>4</sub><sup>-</sup>\_1

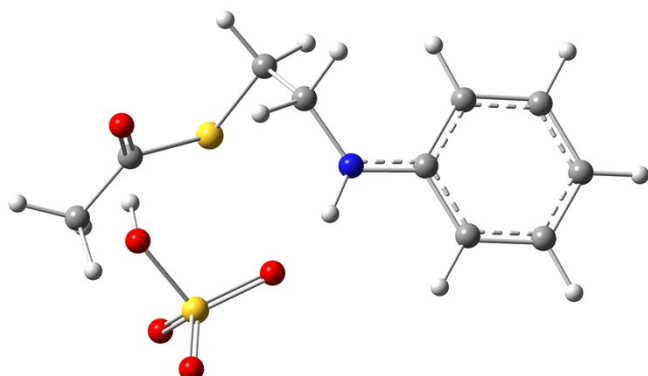

Level of theory: M06-2X/6-311+G(d,p) in PCM (water)//B3LYP/6-31+G(d), 1 atm, 298.15 K

Energy: -1616.78615938 hartree/particle

Thermal correction to Gibbs free energy: 0.189614 hartree/particle

Thermal correction to Enthalpy: 0.261876 hartree/particle

Number of imaginary frequencies: 0

| Center Number | Atomic Number | Atomic Type | Coordinates (Angstroms) |           |           |
|---------------|---------------|-------------|-------------------------|-----------|-----------|
|               |               |             | X                       | Y         | Z         |
| 1             | 6             | 0           | 1.692228                | 2.836926  | -0.394979 |
| 2             | 6             | 0           | 2.669962                | 3.818145  | -0.498705 |
| 3             | 6             | 0           | 3.950512                | 3.519369  | -0.990872 |
| 4             | 6             | 0           | 4.221444                | 2.205088  | -1.377439 |
| 5             | 6             | 0           | 3.250992                | 1.204162  | -1.276678 |
| 6             | 6             | 0           | 1.957890                | 1.497792  | -0.781825 |
| 7             | 1             | 0           | 0.701960                | 3.082187  | -0.018625 |
| 8             | 1             | 0           | 2.429396                | 4.835106  | -0.193882 |
| 9             | 1             | 0           | 4.711586                | 4.291752  | -1.068806 |
| 10            | 1             | 0           | 5.205427                | 1.944485  | -1.764490 |
| 11            | 1             | 0           | 3.500522                | 0.193334  | -1.585277 |
| 12            | 6             | 0           | 1.033518                | -0.793496 | -1.153278 |
| 13            | 1             | 0           | 0.005062                | -1.129751 | -1.294033 |
| 14            | 1             | 0           | 1.524766                | -0.832289 | -2.141063 |
| 15            | 6             | 0           | 1.769373                | -1.807205 | -0.249747 |
| 16            | 1             | 0           | 2.839208                | -1.582157 | -0.188742 |
| 17            | 1             | 0           | 1.652557                | -2.814260 | -0.664860 |
| 18            | 16            | 0           | 1.236162                | -1.842364 | 1.505457  |
| 19            | 6             | 0           | -0.403942               | -2.545613 | 1.378096  |
| 20            | 6             | 0           | -1.151013               | -2.601991 | 2.686323  |
| 21            | 1             | 0           | -0.484736               | -2.536607 | 3.551915  |
| 22            | 1             | 0           | -1.838711               | -1.743100 | 2.685075  |
| 23            | 1             | 0           | -1.738885               | -3.524828 | 2.725040  |
| 24            | 8             | 0           | -0.885938               | -2.904083 | 0.313759  |
| 25            | 1             | 0           | 0.021700                | 0.867946  | -0.422012 |
| 26            | 7             | 0           | 0.967636                | 0.557446  | -0.659857 |
| 27            | 8             | 0           | -4.297600               | 1.028693  | 0.074244  |
| 28            | 8             | 0           | -3.310184               | -1.161481 | -0.462060 |
| 29            | 8             | 0           | -2.716494               | -0.037807 | 1.707713  |
| 30            | 8             | 0           | -1.854721               | 0.897144  | -0.423804 |
| 31            | 1             | 0           | -2.568232               | -1.757467 | -0.234376 |
| 32            | 16            | 0           | -3.030248               | 0.315600  | 0.294864  |

2·HSO<sub>4</sub><sup>-</sup>\_2

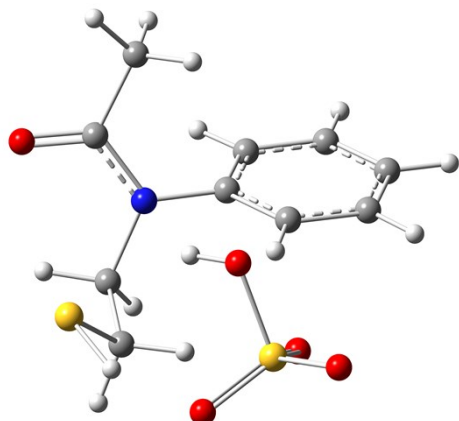

Level of theory: M06-2X/6-311+G(d,p) in PCM (water)//B3LYP/6-31+G(d), 1 atm, 298.15 K

Energy: -1616.78650456 hartree/particle

Thermal correction to Gibbs free energy: 0.187231 hartree/particle

Thermal correction to Enthalpy: 0.260197 hartree/particle

Number of imaginary frequencies: 0

| Center Number | Atomic Number | Atomic Type | Coordinates (Angstroms) |           |           |
|---------------|---------------|-------------|-------------------------|-----------|-----------|
|               |               |             | X                       | Y         | Z         |
| 1             | 6             | 0           | 1.299137                | 2.245785  | 1.079957  |
| 2             | 7             | 0           | 1.302552                | 1.411761  | -0.019674 |
| 3             | 16            | 0           | -2.009799               | 1.689610  | -0.459571 |
| 4             | 6             | 0           | 1.869975                | 1.687326  | 2.376985  |
| 5             | 6             | 0           | 0.683600                | 1.876009  | -1.273150 |
| 6             | 6             | 0           | -0.656400               | 1.221287  | -1.629316 |
| 7             | 8             | 0           | 0.847705                | 3.390445  | 1.036736  |
| 8             | 1             | 0           | -2.853446               | 0.687077  | -0.839878 |
| 9             | 6             | 0           | 2.093488                | 0.210612  | -0.065364 |
| 10            | 1             | 0           | -0.590331               | 0.130636  | -1.647470 |
| 11            | 1             | 0           | 1.389339                | 1.672921  | -2.089325 |
| 12            | 1             | 0           | 0.566764                | 2.959001  | -1.181256 |
| 13            | 1             | 0           | -0.928802               | 1.561858  | -2.635184 |
| 14            | 1             | 0           | 2.958749                | 1.813895  | 2.406329  |
| 15            | 1             | 0           | 1.435325                | 2.262249  | 3.197553  |
| 16            | 1             | 0           | 1.653668                | 0.623908  | 2.510756  |
| 17            | 6             | 0           | 3.492586                | 0.317235  | -0.110752 |
| 18            | 6             | 0           | 1.490974                | -1.051860 | -0.109702 |
| 19            | 6             | 0           | 2.291783                | -2.196457 | -0.188588 |
| 20            | 6             | 0           | 4.286193                | -0.829795 | -0.174025 |
| 21            | 6             | 0           | 3.684757                | -2.092746 | -0.213585 |
| 22            | 1             | 0           | 1.805970                | -3.167621 | -0.228956 |
| 23            | 1             | 0           | 3.950470                | 1.303820  | -0.097076 |
| 24            | 1             | 0           | 5.369812                | -0.736272 | -0.201395 |
| 25            | 1             | 0           | 4.299766                | -2.988314 | -0.268817 |
| 26            | 8             | 0           | -1.364575               | -2.104724 | -0.880725 |
| 27            | 8             | 0           | -3.274405               | -3.445771 | 0.034878  |
| 28            | 8             | 0           | -2.491153               | -1.458036 | 1.271906  |
| 29            | 8             | 0           | -3.657508               | -1.162515 | -0.939437 |
| 30            | 1             | 0           | 0.410684                | -1.168708 | -0.099375 |
| 31            | 1             | 0           | -2.208591               | -0.531555 | 1.131427  |
| 32            | 16            | 0           | -2.724639               | -2.115766 | -0.267102 |

ts6·HSO<sub>4</sub><sup>-</sup>

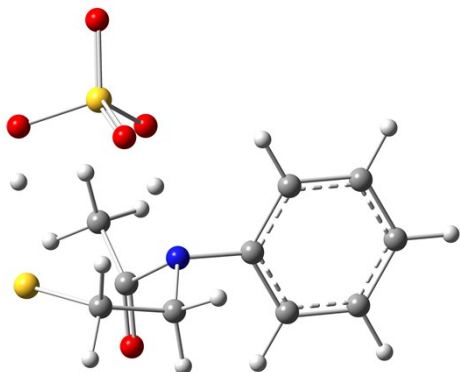

Level of theory: M06-2X/6-311+G(d,p) in PCM (water)//B3LYP/6-31+G(d), 1 atm, 298.15 K

Energy: -1616.74672157 hartree/particle

Thermal correction to Gibbs free energy: 0.190549 hartree/particle

Thermal correction to Enthalpy: 0.256044 hartree/particle

Number of imaginary frequencies: 1

IRC calc: OK

| Center Number | Atomic Number | Atomic Type | Coordinates (Angstroms) |           |           |
|---------------|---------------|-------------|-------------------------|-----------|-----------|
|               |               |             | X                       | Y         | Z         |
| 1             | 6             | 0           | 0.696040                | 1.643938  | 0.859228  |
| 2             | 7             | 0           | 0.672446                | 0.508699  | -0.178777 |
| 3             | 16            | 0           | -1.584912               | 2.350184  | -0.078318 |
| 4             | 6             | 0           | 0.278675                | 1.204866  | 2.247534  |
| 5             | 6             | 0           | 0.453283                | 1.099216  | -1.537190 |
| 6             | 6             | 0           | -0.975664               | 1.650446  | -1.670243 |
| 7             | 8             | 0           | 1.446663                | 2.593394  | 0.669434  |
| 8             | 1             | 0           | -2.749200               | 0.795453  | 0.335341  |
| 9             | 6             | 0           | 1.936217                | -0.240397 | -0.138160 |
| 10            | 1             | 0           | -1.648549               | 0.855683  | -2.001140 |
| 11            | 1             | 0           | 0.635185                | 0.305899  | -2.270545 |
| 12            | 1             | 0           | 1.193212                | 1.893454  | -1.687446 |
| 13            | 1             | 0           | -0.970426               | 2.430746  | -2.440633 |
| 14            | 1             | 0           | 1.146173                | 0.728255  | 2.730234  |
| 15            | 1             | 0           | 0.015976                | 2.094773  | 2.824124  |
| 16            | 1             | 0           | -0.553472               | 0.501590  | 2.240100  |
| 17            | 6             | 0           | 3.174468                | 0.397714  | -0.315590 |
| 18            | 6             | 0           | 1.901694                | -1.626683 | 0.063947  |
| 19            | 6             | 0           | 3.090316                | -2.363413 | 0.085227  |
| 20            | 6             | 0           | 4.356860                | -0.345106 | -0.288307 |
| 21            | 6             | 0           | 4.321897                | -1.729066 | -0.090627 |
| 22            | 1             | 0           | 3.045493                | -3.438781 | 0.242189  |
| 23            | 1             | 0           | 3.204131                | 1.472590  | -0.450300 |
| 24            | 1             | 0           | 5.309459                | 0.163439  | -0.421612 |
| 25            | 1             | 0           | 5.244757                | -2.304905 | -0.072731 |
| 26            | 8             | 0           | -2.502926               | -1.328861 | -1.468071 |
| 27            | 8             | 0           | -3.157591               | -2.522792 | 0.650434  |
| 28            | 8             | 0           | -1.065944               | -1.218183 | 0.561184  |
| 29            | 8             | 0           | -3.291934               | -0.071128 | 0.559743  |
| 30            | 1             | 0           | 0.947987                | -2.123335 | 0.205086  |
| 31            | 1             | 0           | -0.399229               | -0.402219 | 0.149860  |
| 32            | 16            | 0           | -2.537431               | -1.369063 | 0.002830  |

## NBO analysis of **ts6·HSO<sub>4</sub><sup>-</sup>** (excerpt)

### Second Order Perturbation Theory Analysis of Fock Matrix in NBO Basis

Threshold for printing: 0.50 kcal/mol  
 (Intermolecular threshold: 0.05 kcal/mol)

| Donor NBO (i)         | Acceptor NBO (j)   | E(2)<br>kcal/mol | E(j)-E(i)<br>a. u. | F(i, j)<br>a. u. |
|-----------------------|--------------------|------------------|--------------------|------------------|
| =====                 |                    |                  |                    |                  |
| from unit 1 to unit 4 |                    |                  |                    |                  |
| 60. LP ( 1) N 2       | / 79. LP*( 1) H 31 | 132.75           | 0.49               | 0.243            |
| 60. LP ( 1) N 2       | /438. RY*( 1) H 31 | 0.06             | 1.88               | 0.010            |
| 60. LP ( 1) N 2       | /439. RY*( 2) H 31 | 0.70             | 2.96               | 0.043            |
| 60. LP ( 1) N 2       | /440. RY*( 3) H 31 | 0.74             | 2.51               | 0.041            |
|                       |                    |                  |                    |                  |
| from unit 3 to unit 2 |                    |                  |                    |                  |
| 76. LP ( 1) O 29      | / 66. LP*( 1) H 8  | 19.57            | 0.82               | 0.129            |
| 76. LP ( 1) O 29      | /203. RY*( 1) H 8  | 1.68             | 2.14               | 0.054            |
| 76. LP ( 1) O 29      | /205. RY*( 3) H 8  | 0.14             | 2.41               | 0.017            |
| 76. LP ( 1) O 29      | /206. RY*( 4) H 8  | 0.22             | 3.41               | 0.025            |
| 76. LP ( 1) O 29      | /207. RY*( 5) H 8  | 0.21             | 2.35               | 0.020            |
| 77. LP ( 2) O 29      | /204. RY*( 2) H 8  | 0.31             | 2.04               | 0.023            |
| 77. LP ( 2) O 29      | /205. RY*( 3) H 8  | 0.61             | 2.07               | 0.032            |
| 77. LP ( 2) O 29      | /207. RY*( 5) H 8  | 0.06             | 2.01               | 0.010            |
| 78. LP ( 3) O 29      | / 66. LP*( 1) H 8  | 366.48           | 0.71               | 0.474            |
| 78. LP ( 3) O 29      | /203. RY*( 1) H 8  | 12.85            | 2.04               | 0.159            |
| 78. LP ( 3) O 29      | /204. RY*( 2) H 8  | 0.97             | 2.27               | 0.046            |
| 78. LP ( 3) O 29      | /205. RY*( 3) H 8  | 0.12             | 2.30               | 0.017            |
| 78. LP ( 3) O 29      | /207. RY*( 5) H 8  | 0.31             | 2.24               | 0.026            |

3·HSO<sub>4</sub><sup>-</sup>\_2

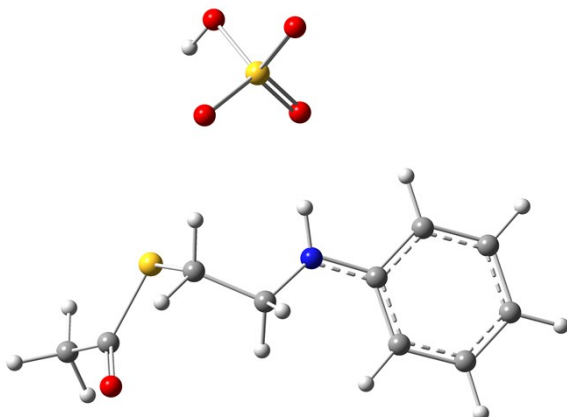

Level of theory: M06-2X/6-311+G(d,p) in PCM (water)//B3LYP/6-31+G(d), 1 atm, 298.15 K

Energy: -1616.77956168 hartree/particle

Thermal correction to Gibbs free energy: 0.184020 hartree/particle

Thermal correction to Enthalpy: 0.261726 hartree/particle

Number of imaginary frequencies: 0

| Center Number | Atomic Number | Atomic Type | Coordinates (Angstroms) |           |           |
|---------------|---------------|-------------|-------------------------|-----------|-----------|
|               |               |             | X                       | Y         | Z         |
| 1             | 6             | 0           | -0.113936               | 3.550625  | 1.418760  |
| 2             | 7             | 0           | 0.985463                | -0.307053 | -0.473027 |
| 3             | 16            | 0           | -0.728856               | 1.889828  | 1.234813  |
| 4             | 6             | 0           | -0.145202               | 4.055506  | 2.853613  |
| 5             | 6             | 0           | 0.817837                | 1.041799  | -0.968524 |
| 6             | 6             | 0           | -0.539312               | 1.624091  | -0.573054 |
| 7             | 8             | 0           | 0.299323                | 4.242685  | 0.502828  |
| 8             | 1             | 0           | -3.443170               | -1.582953 | 1.067082  |
| 9             | 6             | 0           | 2.176828                | -0.995142 | -0.564239 |
| 10            | 1             | 0           | -1.362975               | 0.960536  | -0.861714 |
| 11            | 1             | 0           | 0.884678                | 1.085149  | -2.073194 |
| 12            | 1             | 0           | 1.614977                | 1.685216  | -0.577940 |
| 13            | 1             | 0           | -0.678080               | 2.598892  | -1.048577 |
| 14            | 1             | 0           | -0.729812               | 4.981831  | 2.887206  |
| 15            | 1             | 0           | -0.572354               | 3.328125  | 3.549622  |
| 16            | 1             | 0           | 0.879228                | 4.292944  | 3.162878  |
| 17            | 6             | 0           | 3.407732                | -0.377862 | -0.885305 |
| 18            | 6             | 0           | 2.184944                | -2.388970 | -0.300885 |
| 19            | 6             | 0           | 3.370802                | -3.111970 | -0.334567 |
| 20            | 6             | 0           | 4.591830                | -1.121745 | -0.910585 |
| 21            | 6             | 0           | 4.593632                | -2.490144 | -0.634325 |
| 22            | 1             | 0           | 3.341216                | -4.180743 | -0.129693 |
| 23            | 1             | 0           | 3.445545                | 0.681849  | -1.117312 |
| 24            | 1             | 0           | 5.523826                | -0.615610 | -1.158100 |
| 25            | 1             | 0           | 5.517789                | -3.062602 | -0.660142 |
| 26            | 8             | 0           | -2.922116               | -0.521423 | -1.318877 |
| 27            | 8             | 0           | -3.101741               | -2.961873 | -1.888608 |
| 28            | 8             | 0           | -1.309399               | -2.124051 | -0.343827 |
| 29            | 8             | 0           | -3.713801               | -2.212537 | 0.375593  |
| 30            | 1             | 0           | 1.240236                | -2.879905 | -0.080792 |
| 31            | 1             | 0           | 0.142808                | -0.891300 | -0.465722 |
| 32            | 16            | 0           | -2.673512               | -1.935604 | -0.929051 |

**with  $\text{HCO}_3^-$**

$\text{HCO}_3^-$

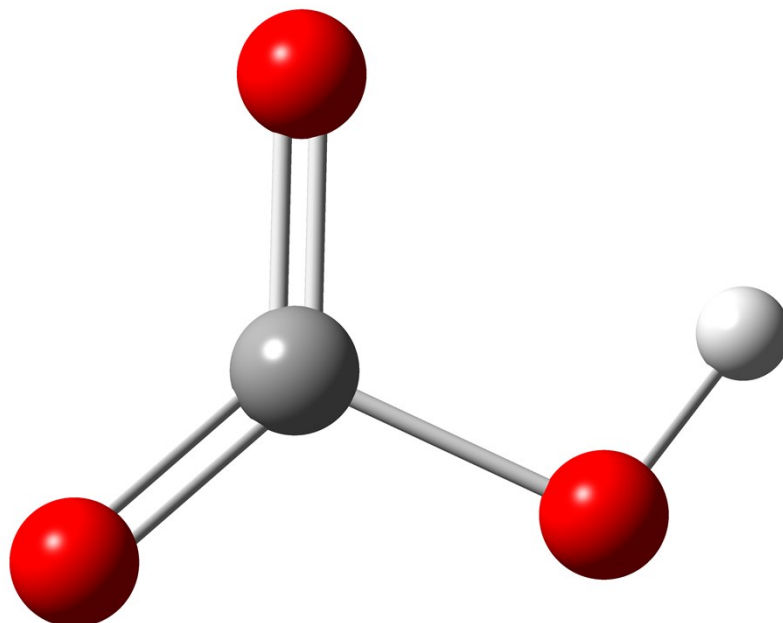

Level of theory: M06-2X/6-311+G(d,p) in PCM (water)//B3LYP/6-31+G(d), 1 atm, 298.15 K

Energy: -264.55203985 hartree/particle

Thermal correction to Gibbs free energy: 0.000121 hartree/particle

Thermal correction to Enthalpy: 0.030397 hartree/particle

Number of imaginary frequencies: 0

| Center Number | Atomic Number | Atomic Type | Coordinates (Angstroms) |           |           |
|---------------|---------------|-------------|-------------------------|-----------|-----------|
|               |               |             | X                       | Y         | Z         |
| 1             | 6             | 0           | -0.157500               | -0.067242 | -0.000011 |
| 2             | 8             | 0           | 0.098932                | -1.298861 | 0.000025  |
| 3             | 8             | 0           | 1.026027                | 0.768506  | 0.000069  |
| 4             | 1             | 0           | 1.746370                | 0.117346  | -0.000485 |
| 5             | 8             | 0           | -1.225130               | 0.566118  | -0.000025 |

2·HCO<sub>3</sub><sup>-</sup>\_1

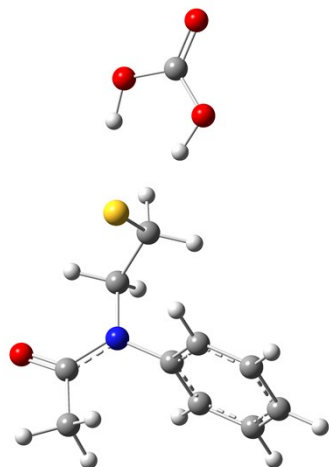

Level of theory: M06-2X/6-311+G(d,p) in PCM (water)//B3LYP/6-31+G(d), 1 atm, 298.15 K

Energy: -1181.5544092 hartree/particle

Thermal correction to Gibbs free energy: 0.190581 hartree/particle

Thermal correction to Enthalpy: 0.260117 hartree/particle

Number of imaginary frequencies: 0

| Center Number | Atomic Number | Atomic Type | Coordinates (Angstroms) |           |           |
|---------------|---------------|-------------|-------------------------|-----------|-----------|
|               |               |             | X                       | Y         | Z         |
| 1             | 6             | 0           | -1.417697               | 1.264752  | -0.687662 |
| 2             | 6             | 0           | -1.858163               | 2.586350  | -0.800731 |
| 3             | 6             | 0           | -2.953219               | 3.037509  | -0.056775 |
| 4             | 6             | 0           | -3.605325               | 2.161580  | 0.816702  |
| 5             | 6             | 0           | -3.163202               | 0.841551  | 0.939683  |
| 6             | 6             | 0           | -2.076905               | 0.384116  | 0.180166  |
| 7             | 1             | 0           | -0.554793               | 0.900398  | -1.242655 |
| 8             | 1             | 0           | -1.337827               | 3.265874  | -1.471793 |
| 9             | 1             | 0           | -3.291995               | 4.066966  | -0.151046 |
| 10            | 1             | 0           | -4.452452               | 2.505688  | 1.406265  |
| 11            | 1             | 0           | -3.657228               | 0.155163  | 1.623641  |
| 12            | 7             | 0           | -1.636775               | -0.975058 | 0.318062  |
| 13            | 6             | 0           | -0.511087               | -1.258585 | 1.232431  |
| 14            | 1             | 0           | -0.848069               | -1.067513 | 2.266187  |
| 15            | 1             | 0           | -0.310049               | -2.325776 | 1.131997  |
| 16            | 6             | 0           | 0.764544                | -0.450007 | 0.965534  |
| 17            | 1             | 0           | 1.470574                | -0.737178 | 1.756153  |
| 18            | 1             | 0           | 0.563283                | 0.619766  | 1.107673  |
| 19            | 16            | 0           | 1.527078                | -0.741072 | -0.690558 |
| 20            | 6             | 0           | -2.339194               | -2.020267 | -0.235930 |
| 21            | 6             | 0           | -3.424884               | -1.666538 | -1.247757 |
| 22            | 1             | 0           | -4.333118               | -1.316570 | -0.742558 |
| 23            | 1             | 0           | -3.109397               | -0.881778 | -1.941827 |
| 24            | 1             | 0           | -3.663800               | -2.577444 | -1.800641 |
| 25            | 8             | 0           | -2.118409               | -3.198478 | 0.049784  |
| 26            | 1             | 0           | 3.551686                | -1.002469 | -0.076049 |
| 27            | 8             | 0           | 4.514371                | -0.849178 | 0.196622  |
| 28            | 8             | 0           | 3.907033                | 1.255586  | -0.448735 |
| 29            | 1             | 0           | 3.042382                | 0.748493  | -0.598895 |
| 30            | 6             | 0           | 4.865494                | 0.440092  | 0.029798  |
| 31            | 8             | 0           | 5.981106                | 0.842773  | 0.295239  |

ts4·HCO<sub>3</sub><sup>-</sup>

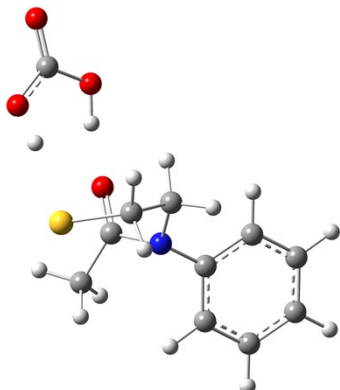

Level of theory: M06-2X/6-311+G(d,p) in PCM (water)//B3LYP/6-31+G(d), 1 atm, 298.15 K

Energy: -1181.52317331 hartree/particle

Thermal correction to Gibbs free energy: 0.194169 hartree/particle

Thermal correction to Enthalpy: 0.258217 hartree/particle

Number of imaginary frequencies: 1

IRC calc: OK

| Center Number | Atomic Number | Atomic Type | Coordinates (Angstroms) |           |           |
|---------------|---------------|-------------|-------------------------|-----------|-----------|
|               |               |             | X                       | Y         | Z         |
| 1             | 6             | 0           | 3.235337                | -0.745335 | -0.310183 |
| 2             | 6             | 0           | 4.547244                | -0.288526 | -0.441466 |
| 3             | 6             | 0           | 4.889531                | 1.016992  | -0.073094 |
| 4             | 6             | 0           | 3.892004                | 1.862028  | 0.421565  |
| 5             | 6             | 0           | 2.573129                | 1.416849  | 0.535005  |
| 6             | 6             | 0           | 2.217962                | 0.100927  | 0.174311  |
| 7             | 1             | 0           | 2.992508                | -1.773324 | -0.555786 |
| 8             | 1             | 0           | 5.311905                | -0.967576 | -0.813853 |
| 9             | 1             | 0           | 5.914985                | 1.366834  | -0.166356 |
| 10            | 1             | 0           | 4.134764                | 2.883963  | 0.706493  |
| 11            | 1             | 0           | 1.803783                | 2.095942  | 0.888914  |
| 12            | 7             | 0           | 0.887818                | -0.370845 | 0.313266  |
| 13            | 6             | 0           | 0.070986                | 0.122197  | 1.429213  |
| 14            | 1             | 0           | 0.747706                | 0.472547  | 2.217334  |
| 15            | 1             | 0           | -0.564315               | 0.965686  | 1.126856  |
| 16            | 6             | 0           | -0.787742               | -1.042513 | 1.953740  |
| 17            | 1             | 0           | -1.527756               | -0.643486 | 2.660254  |
| 18            | 1             | 0           | -0.138253               | -1.734165 | 2.505848  |
| 19            | 16            | 0           | -1.613842               | -1.959680 | 0.595266  |
| 20            | 6             | 0           | 0.127052                | -0.572471 | -0.909545 |
| 21            | 6             | 0           | 0.592176                | -1.671341 | -1.842757 |
| 22            | 1             | 0           | 1.414351                | -1.294527 | -2.469719 |
| 23            | 1             | 0           | 0.920292                | -2.557959 | -1.298423 |
| 24            | 1             | 0           | -0.240378               | -1.933377 | -2.498776 |
| 25            | 8             | 0           | -0.618768               | 0.322642  | -1.332495 |
| 26            | 1             | 0           | -2.071159               | 1.051260  | -0.689430 |
| 27            | 8             | 0           | -2.794668               | 1.678438  | -0.434598 |
| 28            | 8             | 0           | -4.071445               | -0.213400 | -0.171974 |
| 29            | 1             | 0           | -3.195176               | -0.689627 | 0.041615  |
| 30            | 6             | 0           | -4.013454               | 1.117743  | -0.275537 |
| 31            | 8             | 0           | -5.010352               | 1.813484  | -0.228382 |



NBO analysis of **ts4·HCO<sub>3</sub><sup>-</sup>** (excerpt)

Second Order Perturbation Theory Analysis of Fock Matrix in NBO Basis

Threshold for printing: 0.50 kcal/mol  
 (Intermolecular threshold: 0.05 kcal/mol)

| Donor NBO (i)         | Acceptor NBO (j)          | E(2)<br>kcal/mol | E(j)-E(i)<br>a. u. | F(i, j)<br>a. u. |
|-----------------------|---------------------------|------------------|--------------------|------------------|
| =====                 |                           |                  |                    |                  |
| from unit 1 to unit 2 |                           |                  |                    |                  |
| 60. LP ( 1) 0 25      | /359. RY*( 5) H 26        | 0.09             | 2.90               | 0.015            |
| 60. LP ( 1) 0 25      | /462. BD*( 1) H 26 - 0 27 | 10.09            | 1.25               | 0.100            |
| 61. LP ( 2) 0 25      | /462. BD*( 1) H 26 - 0 27 | 3.91             | 0.83               | 0.052            |
| from unit 2 to unit 3 |                           |                  |                    |                  |
| 64. LP ( 1) 0 28      | / 67. LP*( 1) H 29        | 14.99            | 0.76               | 0.108            |
| 64. LP ( 1) 0 28      | /394. RY*( 1) H 29        | 1.30             | 2.11               | 0.047            |
| 64. LP ( 1) 0 28      | /396. RY*( 3) H 29        | 0.20             | 2.46               | 0.020            |
| 64. LP ( 1) 0 28      | /398. RY*( 5) H 29        | 0.20             | 3.13               | 0.023            |
| 65. LP ( 2) 0 28      | / 67. LP*( 1) H 29        | 3.04             | 0.50               | 0.038            |
| 65. LP ( 2) 0 28      | /395. RY*( 2) H 29        | 0.91             | 2.00               | 0.040            |
| 65. LP ( 2) 0 28      | /396. RY*( 3) H 29        | 0.14             | 2.21               | 0.016            |
| 66. LP ( 3) 0 28      | / 67. LP*( 1) H 29        | 420.50           | 0.70               | 0.498            |
| 66. LP ( 3) 0 28      | /394. RY*( 1) H 29        | 17.87            | 2.05               | 0.190            |
| 66. LP ( 3) 0 28      | /395. RY*( 2) H 29        | 0.21             | 2.20               | 0.021            |
| 66. LP ( 3) 0 28      | /396. RY*( 3) H 29        | 0.99             | 2.40               | 0.048            |
| 66. LP ( 3) 0 28      | /397. RY*( 4) H 29        | 0.32             | 2.37               | 0.027            |
| 66. LP ( 3) 0 28      | /398. RY*( 5) H 29        | 0.20             | 3.08               | 0.024            |

int2·HCO<sub>3</sub><sup>-</sup>\_1

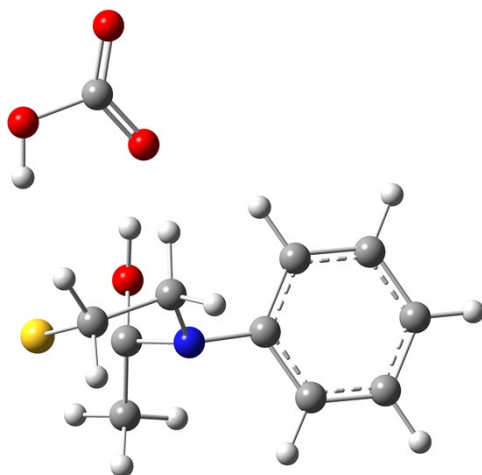

Level of theory: M06-2X/6-311+G(d,p) in PCM (water)//B3LYP/6-31+G(d), 1 atm, 298.15 K

Energy: -1181.54627580 hartree/particle

Thermal correction to Gibbs free energy: 0.196477 hartree/particle

Thermal correction to Enthalpy: 0.260507 hartree/particle

Number of imaginary frequencies: 0

| Center Number | Atomic Number | Atomic Type | Coordinates (Angstroms) |           |           |
|---------------|---------------|-------------|-------------------------|-----------|-----------|
|               |               |             | X                       | Y         | Z         |
| 1             | 6             | 0           | 3.084732                | -0.479835 | 0.327663  |
| 2             | 6             | 0           | 4.179277                | 0.370954  | 0.146322  |
| 3             | 6             | 0           | 3.974486                | 1.741405  | -0.039299 |
| 4             | 6             | 0           | 2.670503                | 2.248074  | -0.048623 |
| 5             | 6             | 0           | 1.572424                | 1.399937  | 0.120219  |
| 6             | 6             | 0           | 1.775352                | 0.022387  | 0.313819  |
| 7             | 1             | 0           | 3.228995                | -1.544517 | 0.491796  |
| 8             | 1             | 0           | 5.188853                | -0.035668 | 0.159322  |
| 9             | 1             | 0           | 4.823164                | 2.408815  | -0.175779 |
| 10            | 1             | 0           | 2.500258                | 3.311632  | -0.201643 |
| 11            | 1             | 0           | 0.561525                | 1.799715  | 0.084415  |
| 12            | 7             | 0           | 0.688968                | -0.897201 | 0.525771  |
| 13            | 6             | 0           | -0.259469               | -0.507880 | 1.584582  |
| 14            | 1             | 0           | 0.306046                | -0.335732 | 2.508352  |
| 15            | 1             | 0           | -0.824019               | 0.400398  | 1.334903  |
| 16            | 6             | 0           | -1.209335               | -1.692904 | 1.735094  |
| 17            | 1             | 0           | -2.147111               | -1.400475 | 2.216769  |
| 18            | 1             | 0           | -0.745126               | -2.510163 | 2.297644  |
| 19            | 16            | 0           | -1.551191               | -2.233066 | 0.013601  |
| 20            | 6             | 0           | -0.015755               | -1.346514 | -0.704082 |
| 21            | 6             | 0           | 0.827364                | -2.347678 | -1.493264 |
| 22            | 1             | 0           | 1.715879                | -1.840612 | -1.886892 |
| 23            | 1             | 0           | 1.132139                | -3.183968 | -0.859207 |
| 24            | 1             | 0           | 0.248530                | -2.724974 | -2.342236 |
| 25            | 8             | 0           | -0.389008               | -0.354053 | -1.589058 |
| 26            | 1             | 0           | -0.944293               | 0.367842  | -1.146324 |
| 27            | 8             | 0           | -1.673220               | 1.628489  | -0.423039 |
| 28            | 8             | 0           | -3.748346               | 0.741662  | -0.190828 |
| 29            | 1             | 0           | -3.190474               | -0.031731 | -0.392584 |
| 30            | 6             | 0           | -2.903168               | 1.870956  | -0.163158 |
| 31            | 8             | 0           | -3.443996               | 2.940839  | 0.120151  |

int2·HCO<sub>3</sub><sup>-</sup>\_2

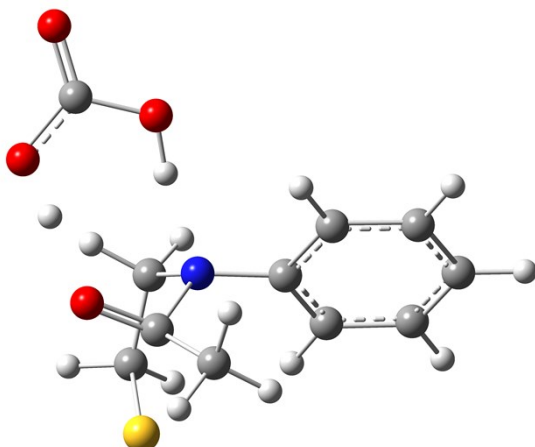

Level of theory: M06-2X/6-311+G(d,p) in PCM (water)//B3LYP/6-31+G(d), 1 atm, 298.15 K

Energy: -1181.53191259 hartree/particle

Thermal correction to Gibbs free energy: 0.195288 hartree/particle

Thermal correction to Enthalpy: 0.259450 hartree/particle

Number of imaginary frequencies: 0

| Center Number | Atomic Number | Atomic Type | Coordinates (Angstroms) |           |           |
|---------------|---------------|-------------|-------------------------|-----------|-----------|
|               |               |             | X                       | Y         | Z         |
| 1             | 6             | 0           | -1.269213               | -1.821068 | 0.455232  |
| 2             | 6             | 0           | -2.431294               | -2.590221 | 0.533268  |
| 3             | 6             | 0           | -3.622922               | -2.129495 | -0.035656 |
| 4             | 6             | 0           | -3.635292               | -0.888045 | -0.677055 |
| 5             | 6             | 0           | -2.476686               | -0.108716 | -0.742425 |
| 6             | 6             | 0           | -1.273667               | -0.565436 | -0.176940 |
| 7             | 1             | 0           | -0.339052               | -2.196011 | 0.871498  |
| 8             | 1             | 0           | -2.399217               | -3.559612 | 1.026126  |
| 9             | 1             | 0           | -4.527687               | -2.731321 | 0.016716  |
| 10            | 1             | 0           | -4.556006               | -0.511783 | -1.118788 |
| 11            | 1             | 0           | -2.516225               | 0.867856  | -1.208835 |
| 12            | 6             | 0           | 0.244881                | 0.891764  | -1.478877 |
| 13            | 1             | 0           | 1.331730                | 0.970474  | -1.562651 |
| 14            | 1             | 0           | -0.112575               | 0.289408  | -2.320551 |
| 15            | 6             | 0           | -0.357364               | 2.327895  | -1.489354 |
| 16            | 1             | 0           | -1.290958               | 2.361014  | -2.065098 |
| 17            | 1             | 0           | 0.348251                | 3.009495  | -1.977717 |
| 18            | 16            | 0           | -0.665490               | 2.838639  | 0.240564  |
| 19            | 6             | 0           | 0.325929                | 1.060392  | 0.935164  |
| 20            | 6             | 0           | -0.402310               | 0.747207  | 2.243860  |
| 21            | 1             | 0           | -0.022862               | -0.198341 | 2.654201  |
| 22            | 1             | 0           | -0.148121               | 1.542971  | 2.949381  |
| 23            | 1             | 0           | -1.488123               | 0.691130  | 2.137684  |
| 24            | 8             | 0           | 1.591731                | 1.255979  | 1.035191  |
| 25            | 1             | 0           | 1.398232                | -1.008131 | -0.123953 |
| 26            | 7             | 0           | -0.041746               | 0.167666  | -0.226867 |
| 27            | 8             | 0           | 3.548310                | 0.004891  | -0.054662 |
| 28            | 8             | 0           | 2.074395                | -1.740246 | -0.180427 |
| 29            | 1             | 0           | 2.736007                | 0.497991  | 0.340663  |
| 30            | 6             | 0           | 3.354877                | -1.295898 | -0.259363 |
| 31            | 8             | 0           | 4.258693                | -2.069037 | -0.515945 |

ts5·HCO<sub>3</sub><sup>-</sup>

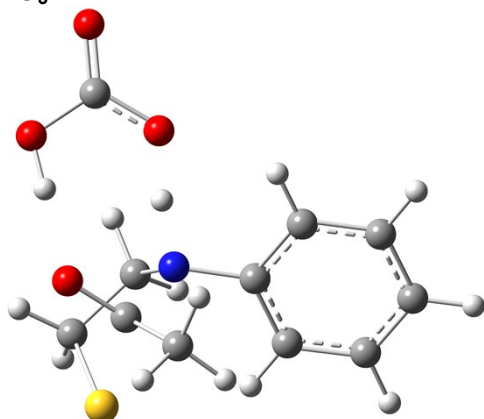

Level of theory: M06-2X/6-311+G(d,p) in PCM (water)//B3LYP/6-31+G(d), 1 atm, 298.15 K

Energy: -1181.52562302 hartree/particle

Thermal correction to Gibbs free energy: 0.193219 hartree/particle

Thermal correction to Enthalpy: 0.255691 hartree/particle

Number of imaginary frequencies: 1

IRC calc: OK

| Center Number | Atomic Number | Atomic Type | Coordinates (Angstroms) |           |           |
|---------------|---------------|-------------|-------------------------|-----------|-----------|
|               |               |             | X                       | Y         | Z         |
| 1             | 6             | 0           | -1.202719               | -1.934296 | 0.244961  |
| 2             | 6             | 0           | -2.385424               | -2.673021 | 0.342022  |
| 3             | 6             | 0           | -3.613773               | -2.097729 | 0.005877  |
| 4             | 6             | 0           | -3.649485               | -0.769534 | -0.431436 |
| 5             | 6             | 0           | -2.473091               | -0.023905 | -0.530929 |
| 6             | 6             | 0           | -1.238988               | -0.600665 | -0.190040 |
| 7             | 1             | 0           | -0.245011               | -2.387702 | 0.481594  |
| 8             | 1             | 0           | -2.339378               | -3.707825 | 0.674471  |
| 9             | 1             | 0           | -4.531931               | -2.676684 | 0.080273  |
| 10            | 1             | 0           | -4.598927               | -0.305709 | -0.691824 |
| 11            | 1             | 0           | -2.507015               | 1.016803  | -0.837365 |
| 12            | 6             | 0           | 0.245633                | 0.825392  | -1.568119 |
| 13            | 1             | 0           | 1.117061                | 0.354196  | -2.037790 |
| 14            | 1             | 0           | -0.619522               | 0.650997  | -2.212256 |
| 15            | 6             | 0           | 0.472103                | 2.337224  | -1.382952 |
| 16            | 1             | 0           | 0.173658                | 2.880983  | -2.284825 |
| 17            | 1             | 0           | 1.522647                | 2.551023  | -1.168890 |
| 18            | 16            | 0           | -0.539930               | 2.855129  | 0.043494  |
| 19            | 6             | 0           | 0.287796                | 1.237906  | 0.966450  |
| 20            | 6             | 0           | -0.556247               | 0.919071  | 2.200005  |
| 21            | 1             | 0           | -0.232198               | -0.040666 | 2.620427  |
| 22            | 1             | 0           | -0.345615               | 1.701279  | 2.935835  |
| 23            | 1             | 0           | -1.630595               | 0.888116  | 2.003367  |
| 24            | 8             | 0           | 1.535742                | 1.360139  | 1.123362  |
| 25            | 1             | 0           | 0.952403                | -0.666748 | -0.111577 |
| 26            | 7             | 0           | 0.004561                | 0.143728  | -0.251911 |
| 27            | 8             | 0           | 3.518783                | -0.135237 | 0.037789  |
| 28            | 8             | 0           | 1.790311                | -1.605299 | -0.092362 |
| 29            | 1             | 0           | 2.788926                | 0.413445  | 0.431919  |
| 30            | 6             | 0           | 3.080610                | -1.403059 | -0.221649 |
| 31            | 8             | 0           | 3.895372                | -2.257181 | -0.557085 |

## NBO analysis of **ts5·HCO<sub>3</sub><sup>-</sup>** (excerpt)

### Second Order Perturbation Theory Analysis of Fock Matrix in NBO Basis

Threshold for printing: 0.50 kcal/mol  
 (Intermolecular threshold: 0.05 kcal/mol)

| Donor NBO (i)         | Acceptor NBO (j)   | E(2)<br>kcal/mol | E(j)-E(i)<br>a. u. | F(i, j)<br>a. u. |
|-----------------------|--------------------|------------------|--------------------|------------------|
| =====                 |                    |                  |                    |                  |
| from unit 1 to unit 2 |                    |                  |                    |                  |
| 62. LP ( 1) N 26      | / 61. LP*( 1) H 25 | 241.70           | 0.49               | 0.324            |
| 62. LP ( 1) N 26      | /338. RY*( 1) H 25 | 1.72             | 2.96               | 0.069            |
| 62. LP ( 1) N 26      | /340. RY*( 3) H 25 | 0.63             | 2.59               | 0.039            |
| within unit 3         |                    |                  |                    |                  |
| 63. LP ( 1) O 27      | /394. RY*( 1) H 29 | 1.90             | 2.61               | 0.063            |
| 64. LP ( 2) O 27      | /395. RY*( 2) H 29 | 1.10             | 1.98               | 0.043            |

3·HCO<sub>3</sub><sup>-</sup>\_1

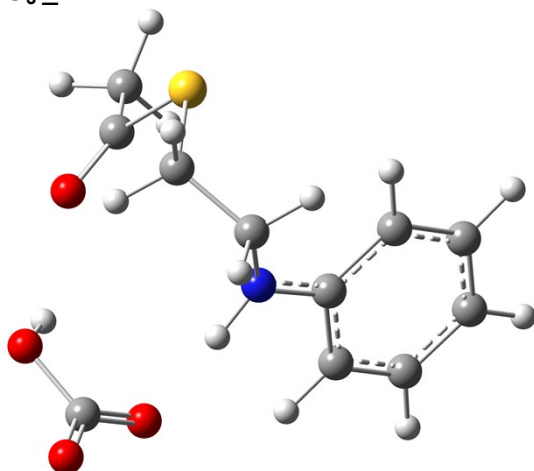

Level of theory: M06-2X/6-311+G(d,p) in PCM (water)//B3LYP/6-31+G(d), 1 atm, 298.15 K

Energy: -1181.54527444 hartree/particle

Thermal correction to Gibbs free energy: 0.187849 hartree/particle

Thermal correction to Enthalpy: 0.260002 hartree/particle

Number of imaginary frequencies: 0

| Center Number | Atomic Number | Atomic Type | Coordinates (Angstroms) |           |           |
|---------------|---------------|-------------|-------------------------|-----------|-----------|
|               |               |             | X                       | Y         | Z         |
| 1             | 6             | 0           | -1.405852               | -2.350935 | -0.072281 |
| 2             | 6             | 0           | -2.601502               | -3.005010 | 0.199749  |
| 3             | 6             | 0           | -3.839523               | -2.405443 | -0.080733 |
| 4             | 6             | 0           | -3.841375               | -1.123959 | -0.637904 |
| 5             | 6             | 0           | -2.649709               | -0.446854 | -0.909607 |
| 6             | 6             | 0           | -1.396678               | -1.047440 | -0.636850 |
| 7             | 1             | 0           | -0.451275               | -2.829340 | 0.133140  |
| 8             | 1             | 0           | -2.567823               | -4.004956 | 0.629485  |
| 9             | 1             | 0           | -4.771821               | -2.924068 | 0.129842  |
| 10            | 1             | 0           | -4.786436               | -0.629849 | -0.860025 |
| 11            | 1             | 0           | -2.696972               | 0.560786  | -1.310914 |
| 12            | 6             | 0           | 0.051355                | 0.679789  | -1.735549 |
| 13            | 1             | 0           | 0.776797                | 0.381927  | -2.509394 |
| 14            | 1             | 0           | -0.870521               | 0.961321  | -2.255050 |
| 15            | 6             | 0           | 0.656102                | 1.905295  | -1.027453 |
| 16            | 1             | 0           | 0.861529                | 2.701862  | -1.752015 |
| 17            | 1             | 0           | 1.594721                | 1.640678  | -0.531327 |
| 18            | 16            | 0           | -0.450298               | 2.623971  | 0.248420  |
| 19            | 6             | 0           | 0.249762                | 1.966388  | 1.769031  |
| 20            | 6             | 0           | -0.624274               | 2.223667  | 2.983316  |
| 21            | 1             | 0           | -1.231718               | 1.327666  | 3.160641  |
| 22            | 1             | 0           | 0.014217                | 2.387768  | 3.856550  |
| 23            | 1             | 0           | -1.298217               | 3.073727  | 2.839630  |
| 24            | 8             | 0           | 1.302409                | 1.368083  | 1.833413  |
| 25            | 1             | 0           | 0.663109                | -1.013165 | -0.677002 |
| 26            | 7             | 0           | -0.183375               | -0.439352 | -0.855016 |
| 27            | 8             | 0           | 3.566224                | -0.107786 | -0.044309 |
| 28            | 8             | 0           | 2.200414                | -1.847600 | -0.535533 |
| 29            | 1             | 0           | 2.856973                | -0.057315 | 0.619838  |
| 30            | 6             | 0           | 3.293256                | -1.266181 | -0.827905 |
| 31            | 8             | 0           | 4.144007                | -1.532800 | -1.683047 |

2·HCO<sub>3</sub><sup>-</sup>\_2

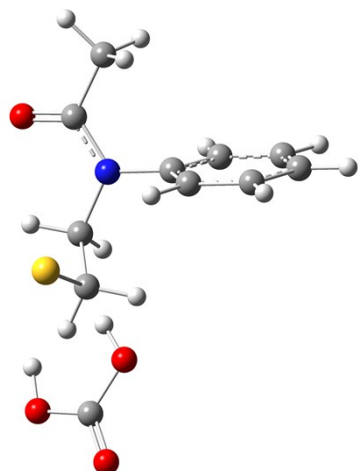

Level of theory: M06-2X/6-311+G(d,p) in PCM (water)//B3LYP/6-31+G(d), 1 atm, 298.15 K

Energy: -1181.55454273 hartree/particle

Thermal correction to Gibbs free energy: 0.189972 hartree/particle

Thermal correction to Enthalpy: 0.255505 hartree/particle

Number of imaginary frequencies: 0

| Center Number | Atomic Number | Atomic Type | Coordinates (Angstroms) |           |           |
|---------------|---------------|-------------|-------------------------|-----------|-----------|
|               |               |             | X                       | Y         | Z         |
| 1             | 6             | 0           | -2.770530               | -1.312186 | 0.550596  |
| 2             | 7             | 0           | -1.805276               | -0.638358 | -0.160331 |
| 3             | 16            | 0           | 1.341388                | -1.544262 | 0.489407  |
| 4             | 6             | 0           | -3.529503               | -0.519433 | 1.610263  |
| 5             | 6             | 0           | -0.984165               | -1.369765 | -1.147082 |
| 6             | 6             | 0           | 0.518812                | -1.069972 | -1.094479 |
| 7             | 8             | 0           | -3.028949               | -2.502705 | 0.362868  |
| 8             | 1             | 0           | 3.324356                | -1.806834 | -0.266190 |
| 9             | 6             | 0           | -1.695731               | 0.792504  | -0.113153 |
| 10            | 1             | 0           | 0.695203                | -0.009265 | -1.315785 |
| 11            | 1             | 0           | -1.362314               | -1.132241 | -2.156757 |
| 12            | 1             | 0           | -1.164954               | -2.428549 | -0.957670 |
| 13            | 1             | 0           | 0.963821                | -1.634775 | -1.924456 |
| 14            | 1             | 0           | -2.872354               | 0.127508  | 2.198898  |
| 15            | 1             | 0           | -4.293899               | 0.117700  | 1.149053  |
| 16            | 1             | 0           | -4.024996               | -1.239968 | 2.264334  |
| 17            | 6             | 0           | -2.594843               | 1.582064  | -0.843672 |
| 18            | 6             | 0           | -0.682549               | 1.405599  | 0.634772  |
| 19            | 6             | 0           | -0.584364               | 2.799526  | 0.659079  |
| 20            | 6             | 0           | -2.497991               | 2.975849  | -0.810083 |
| 21            | 6             | 0           | -1.491720               | 3.587814  | -0.055964 |
| 22            | 1             | 0           | 0.211530                | 3.267866  | 1.233202  |
| 23            | 1             | 0           | -3.368191               | 1.095790  | -1.434112 |
| 24            | 1             | 0           | -3.202688               | 3.580930  | -1.376585 |
| 25            | 1             | 0           | -1.410075               | 4.672327  | -0.033470 |
| 26            | 8             | 0           | 3.785665                | 0.374799  | 0.344839  |
| 27            | 8             | 0           | 4.280020                | -1.659237 | -0.565942 |
| 28            | 1             | 0           | 0.028595                | 0.772808  | 1.162409  |
| 29            | 1             | 0           | 2.912078                | -0.121857 | 0.483583  |
| 30            | 6             | 0           | 4.688380                | -0.409971 | -0.273563 |
| 31            | 8             | 0           | 5.804014                | -0.015207 | -0.550242 |

ts6·HCO<sub>3</sub><sup>-</sup>

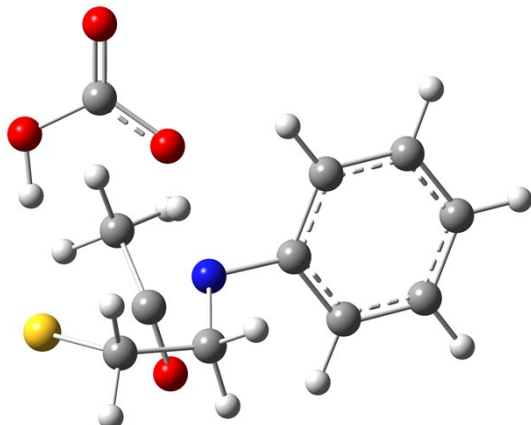

Level of theory: M06-2X/6-311+G(d,p) in PCM (water)//B3LYP/6-31+G(d), 1 atm, 298.15 K

Energy: -1181.52137321 hartree/particle

Thermal correction to Gibbs free energy: 0.192951 hartree/particle

Thermal correction to Enthalpy: 0.255505 hartree/particle

Number of imaginary frequencies: 1

IRC calc: OK

| Center Number | Atomic Number | Atomic Type | Coordinates (Angstroms) |           |           |
|---------------|---------------|-------------|-------------------------|-----------|-----------|
|               |               |             | X                       | Y         | Z         |
| 1             | 6             | 0           | 0.628156                | 1.674612  | 0.796276  |
| 2             | 7             | 0           | 0.716219                | 0.532010  | -0.313512 |
| 3             | 16            | 0           | -1.332907               | 2.407691  | -0.062866 |
| 4             | 6             | 0           | 0.220946                | 1.078507  | 2.138696  |
| 5             | 6             | 0           | 0.575946                | 1.205187  | -1.634510 |
| 6             | 6             | 0           | -0.838841               | 1.789484  | -1.723930 |
| 7             | 8             | 0           | 1.497555                | 2.555658  | 0.736642  |
| 8             | 1             | 0           | -2.373274               | 0.530392  | 0.450053  |
| 9             | 6             | 0           | 1.968353                | -0.213063 | -0.203056 |
| 10            | 1             | 0           | -1.542638               | 1.019893  | -2.057146 |
| 11            | 1             | 0           | 0.754290                | 0.462481  | -2.419971 |
| 12            | 1             | 0           | 1.329175                | 1.997108  | -1.708084 |
| 13            | 1             | 0           | -0.853015               | 2.605757  | -2.454674 |
| 14            | 1             | 0           | 1.102801                | 0.596881  | 2.584112  |
| 15            | 1             | 0           | -0.085756               | 1.895712  | 2.797827  |
| 16            | 1             | 0           | -0.590091               | 0.351442  | 2.065534  |
| 17            | 6             | 0           | 3.214105                | 0.423194  | -0.325837 |
| 18            | 6             | 0           | 1.919912                | -1.593710 | 0.035525  |
| 19            | 6             | 0           | 3.105270                | -2.326953 | 0.149666  |
| 20            | 6             | 0           | 4.392378                | -0.318020 | -0.209100 |
| 21            | 6             | 0           | 4.345442                | -1.695485 | 0.027994  |
| 22            | 1             | 0           | 3.051558                | -3.398097 | 0.331797  |
| 23            | 1             | 0           | 3.250704                | 1.495310  | -0.476288 |
| 24            | 1             | 0           | 5.351689                | 0.187834  | -0.298585 |
| 25            | 1             | 0           | 5.265878                | -2.269087 | 0.116623  |
| 26            | 8             | 0           | -1.056203               | -1.241998 | -0.358587 |
| 27            | 8             | 0           | -2.854222               | -0.306912 | 0.695283  |
| 28            | 1             | 0           | 0.954428                | -2.083798 | 0.112879  |
| 29            | 1             | 0           | -0.305520               | -0.312510 | -0.241076 |
| 30            | 6             | 0           | -2.219630               | -1.420433 | 0.230996  |
| 31            | 8             | 0           | -2.756120               | -2.511465 | 0.374778  |



## NBO analysis of $\text{ts6}\cdot\text{HCO}_3^-$ (excerpt)

### Second Order Perturbation Theory Analysis of Fock Matrix in NBO Basis

Threshold for printing: 0.50 kcal/mol  
 (Intermolecular threshold: 0.05 kcal/mol)

| Donor NBO (i)         | Acceptor NBO (j)   | E(2)<br>kcal/mol | E(j)-E(i)<br>a. u. | F(i, j)<br>a. u. |
|-----------------------|--------------------|------------------|--------------------|------------------|
| =====                 |                    |                  |                    |                  |
| from unit 1 to unit 3 |                    |                  |                    |                  |
| 56. LP ( 1) N 2       | / 67. LP*( 1) H 29 | 189.55           | 0.51               | 0.294            |
| 56. LP ( 1) N 2       | /394. RY*( 1) H 29 | 0.09             | 1.87               | 0.012            |
| 56. LP ( 1) N 2       | /395. RY*( 2) H 29 | 1.14             | 3.09               | 0.057            |
| 56. LP ( 1) N 2       | /396. RY*( 3) H 29 | 0.64             | 2.63               | 0.039            |
| within unit 2         |                    |                  |                    |                  |
| 65. LP ( 1) O 27      | /193. RY*( 1) H 8  | 1.48             | 2.14               | 0.051            |
| 66. LP ( 2) O 27      | /194. RY*( 2) H 8  | 1.02             | 2.02               | 0.042            |

3·HCO<sub>3</sub><sup>-</sup>\_2

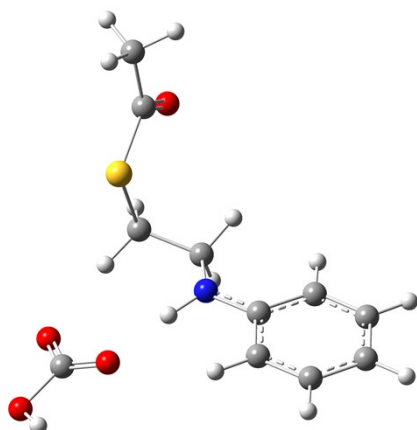

Level of theory: M06-2X/6-311+G(d,p) in PCM (water)//B3LYP/6-31+G(d), 1 atm, 298.15 K

Energy: -1181.54527444 hartree/particle

Thermal correction to Gibbs free energy: 0.187982 hartree/particle

Thermal correction to Enthalpy: 0.260105 hartree/particle

Number of imaginary frequencies: 0

| Center Number | Atomic Number | Atomic Type | Coordinates (Angstroms) |           |           |
|---------------|---------------|-------------|-------------------------|-----------|-----------|
|               |               |             | X                       | Y         | Z         |
| 1             | 6             | 0           | 3.524438                | -1.486787 | 0.157010  |
| 2             | 7             | 0           | -0.711938               | -0.174196 | -0.234594 |
| 3             | 16            | 0           | 2.453716                | -0.151049 | 0.634846  |
| 4             | 6             | 0           | 4.367746                | -2.030447 | 1.302459  |
| 5             | 6             | 0           | 0.322706                | -0.565848 | -1.166028 |
| 6             | 6             | 0           | 1.606499                | 0.235759  | -0.948648 |
| 7             | 8             | 0           | 3.604588                | -1.950750 | -0.970029 |
| 8             | 1             | 0           | -1.291353               | 4.662873  | 0.972831  |
| 9             | 6             | 0           | -1.904667               | -0.845774 | -0.122951 |
| 10            | 1             | 0           | 1.403042                | 1.315856  | -0.922685 |
| 11            | 1             | 0           | 0.010146                | -0.403053 | -2.216518 |
| 12            | 1             | 0           | 0.538132                | -1.636806 | -1.064002 |
| 13            | 1             | 0           | 2.322207                | 0.016355  | -1.745791 |
| 14            | 1             | 0           | 5.423825                | -1.987571 | 1.012725  |
| 15            | 1             | 0           | 4.221349                | -1.478959 | 2.235512  |
| 16            | 1             | 0           | 4.105083                | -3.083013 | 1.460663  |
| 17            | 6             | 0           | -2.151193               | -2.107396 | -0.717195 |
| 18            | 6             | 0           | -2.950954               | -0.265180 | 0.643472  |
| 19            | 6             | 0           | -4.159358               | -0.927316 | 0.817494  |
| 20            | 6             | 0           | -3.373448               | -2.759646 | -0.526919 |
| 21            | 6             | 0           | -4.390299               | -2.187339 | 0.240176  |
| 22            | 1             | 0           | -4.939541               | -0.452180 | 1.410551  |
| 23            | 1             | 0           | -1.390610               | -2.579953 | -1.330712 |
| 24            | 1             | 0           | -3.528205               | -3.730483 | -0.996193 |
| 25            | 1             | 0           | -5.339457               | -2.699485 | 0.380209  |
| 26            | 8             | 0           | -0.933712               | 2.559459  | 0.535762  |
| 27            | 8             | 0           | -0.537925               | 4.770869  | 0.369208  |
| 28            | 1             | 0           | -2.781888               | 0.714602  | 1.082771  |
| 29            | 1             | 0           | -0.733580               | 0.827506  | 0.028567  |
| 30            | 6             | 0           | -0.202457               | 3.447791  | 0.003306  |
| 31            | 8             | 0           | 0.754071                | 3.336096  | -0.780414 |
